# Supplementary material
Source: publisher figshare collection journal article supplement (https://wellcome.figshare.com/ndownloader/files/8593273)
Supplement: Supplementary file 1 [file 8593273]

## Sheet: To share_All institutes full da
PMCID	PMID	DOI	Publisher	Journal title	ISSN	Article title	Cost (£ incl VAT when charged)	Fulltext in EPMC	Ahead of Print?	Author Manuscript?	Licence in Europe PMC	Licence on Publisher website	Journal Type	COAF compliant?	Funder of research (1)	Funder of research (2)	Funder of research (3)	Grant ID (1)	Grant ID (2)	Grant ID (3)
PMC4718564	26869723	10.1063/1.4936345	AIP Publishing	Applied physics letters	0003-6951	Acoustic Particle Palpation for Measuring Tissue Elasticity	1753.8	TRUE	not applicable	FALSE	cc-by	not applicable	hybrid	TRUE
PMC5067544	27629089	unknown	American Academy of Neurology	Neurology	0028-3878, 1526-632X	A genome-wide association study in multiple system atrophy	3084.63	TRUE	not applicable	unknown	cc-by	not applicable	hybrid	TRUE	Wellcome Trust	MRC
PMC4873385	26921328	10.1158/0008-5472.can-15-1551	American Association for Cancer Research (AACR)	Cancer research	0008-5472, 1538-7445	A meta-analysis of individual participant data reveals an association between circulating levels of IGF-I and prostate cancer risk	2168.97	TRUE	not applicable	TRUE	non-standard-licence	unknown	hybrid	FALSE	Cancer Research UK			16491	19169	19170
PMC4795533	26964624	10.1158/0008-5472.can-15-1410	American Association for Cancer Research (AACR)	Cancer research	0008-5472, 1538-7445	Cytochrome P450 allele CYP3A7*1C associates with adverse outcomes in chronic lymphocytic leukemia, breast and lung cancer	2349.36	TRUE	not applicable	TRUE	non-standard-licence	unknown	hybrid	FALSE	Cancer Research UK	Leukaemia & Lymphoma Research		A5660	A8362	A8780
PMC4757751	26659574	10.1158/0008-5472.can-15-2062	American Association for Cancer Research (AACR)	Cancer research	0008-5472, 1538-7445	Oxygen-Enhanced MRI Accurately Identifies, Quantifies, and Maps Tumor Hypoxia in Preclinical Cancer Models.	2343.13	TRUE	not applicable	TRUE	non-standard-licence	unknown	hybrid	FALSE				091763Z/10/Z	15267	16464
PMC4740930	26453693	10.1158/1078-0432.ccr-15-1186	American Association for Cancer Research (AACR)	Clinical cancer research : an official journal of the American Association for Cancer Research	1078-0432	Defining a New Prognostic index for Stage I Non-seminomatous Germ Cell Tumors using CXCL12 Expression and Proportion of Embyronal Carcinoma	2404.86	TRUE	not applicable	TRUE	non-standard-licence	unknown	hybrid	FALSE	Cancer Research UK			MC_U122861331	G0801477
unknown	26581244	10.1158/1078-0432.ccr-15-1855	American Association for Cancer Research (AACR)	Clinical cancer research : an official journal of the American Association for Cancer Research	1078-0432	Are doses and schedules of small molecule targeted anticancer drugs recommended by phase I studies realistic?	1957.8	FALSE	FALSE	not applicable	unknown	unknown	hybrid	FALSE	Cancer Research UK
unknown	27141100	10.1158/1541-7786.mcr-15-0479	American Association for Cancer Research (AACR)	Molecular cancer research : MCR	1541-7786, 1557-3125	AMPK Causes Cell Cycle Arrest in LKB1-Deficient Cells via Activation of CAMKK2.	2134.27	FALSE	FALSE	not applicable	unknown	unknown	hybrid	FALSE	Wellcome Trust	Cancer Research UK
PMC4681344	26702435	10.1126/sciadv.1500723	American Association for the Advancement of Science (AAAS)	Science advances	2375-2548	Selective targeting of the BRG/PB1 bromodomains impairs embryonic and trophoblast stem cell maintenance	2206.68	TRUE	not applicable	unknown	cc-by	not applicable	oa	TRUE	Wellcome Trust	EPSRC		106169	EP/L000253/1	1233347
PMC5061470	27757418	10.1126/sciadv.1600760	American Association for the Advancement of Science (AAAS)	Science advances	2375-2548	Promiscuous targeting of bromodomains by Bromosporine identifies BET proteins as master regulators of primary transcription response in leukemia	3063.94	TRUE	not applicable	unknown	cc-by	not applicable	oa	TRUE	Wellcome Trust
PMC5077176	27267252	10.1021/acschembio.6b00371	American Chemical Society (ACS)	ACS chemical biology	1554-8929, 1554-8937	N-myristoyltransferase inhibition induces ER-stress, cell cycle arrest and apoptosis in cancer cells	1648.92	TRUE	not applicable	unknown	cc-by	not applicable	hybrid	TRUE	BBSRC	Cancer Research UK		BB/D02014X/1	20183
PMC4906374	27331140	10.1021/acsinfecdis.6b00034	American Chemical Society (ACS)	ACS infectious diseases	2373-8227	Global profiling and inhibition of protein lipidation in vector and host stages of the sleeping sickness parasite Trypanosoma brucei	1638.34	TRUE	not applicable	unknown	cc-by	not applicable	hybrid	TRUE	BBSRC			BB/D02014X/1
unknown	27326329	10.1021/acsmedchemlett.6b00022	American Chemical Society (ACS)	ACS medicinal chemistry letters	1948-5875	2,8-disubstituted-1,6-naphthyridines and 4,6-disubstituted-isoquionolines with potent, selective affinity for CDK8/19	1676.88	FALSE	FALSE	not applicable	unknown	unknown	hybrid	FALSE	Cancer Research UK
PMC4961266	27267364	10.1021/acsnano.6b00461	American Chemical Society (ACS)	ACS nano	1936-0851, 1936-086X	Molecular Insights into Division of Single Human Cancer Cells in On-Chip Transparent Microtubes.	1797.08	TRUE	not applicable	FALSE	cc-by	not applicable	hybrid	TRUE	ERC	Cancer Research UK	0	311529
PMC4819533	26905779	10.1021/acsnano.6b01246	American Chemical Society (ACS)	ACS nano	1936-0851, 1936-086X	Tunable Nanopatterning of Conductive Polymers via Electrohydrodynamic Lithography	3328.25	TRUE	not applicable	unknown	cc-by	not applicable	hybrid	TRUE	Wellcome Trust	EPSRC	0	174ISSFPP	EP/K503873/1
PMC4914944	26835539	10.1021/acssynbio.5b00179	American Chemical Society (ACS)	ACS synthetic biology	2161-5063	A statistical approach reveals designs for the most robust stochastic gene oscillators	2771.2	TRUE	not applicable	unknown	cc-by	not applicable	hybrid	TRUE	Wellcome Trust
PMC5023225	26436725	10.1021/acssynbio.5b00116	American Chemical Society (ACS)	ACS synthetic biology	2161-5063	Characterization of intrinsic properties of promoters	3640.78	TRUE	not applicable	unknown	cc-by	not applicable	hybrid	TRUE	Wellcome Trust	EPSRC		unknown
PMC5047652	27454319	10.1021/acs.analchem.6b02082	American Chemical Society (ACS)	Analytical chemistry	0003-2700, 1520-6882	Optimized Fragmentation Regime for Diazirine Photo-Cross-Linked Peptides	3131.56	TRUE	not applicable	unknown	cc-by	not applicable	hybrid	TRUE	Wellcome Trust
PMC4948919	27295282	10.1021/acs.analchem.6b01662	American Chemical Society (ACS)	Analytical chemistry	0003-2700, 1520-6882	Abnormally high content of free glucosamine residues identified in a preparation of commercially available porcine intestinal heparan sulfate	3590.69	TRUE	not applicable	unknown	cc-by	not applicable	hybrid	TRUE
unknown	27228284	10.1021/acs.analchem.6b01167	American Chemical Society (ACS)	Analytical chemistry	0003-2700, 1520-6882	Understanding the Complexity of Porous Graphitic Carbon (PGC) Chromatography: Modulation of Mobile-Stationary Phase Interactions Overcomes Loss of Retention and Reduces Variability.	1764.28	FALSE	FALSE	not applicable	unknown	unknown	hybrid	FALSE	cancer-research-uk,	0	0
PMC4730229	26701387	10.1021/acs.biochem.5b01128	American Chemical Society (ACS)	Biochemistry	0006-2960, 1520-4995	Benzobisthiazoles Represent a Novel Scaffold for Kinase Inhibitors of CLK Family Members	1367.26	TRUE	not applicable	unknown	cc-by	not applicable	hybrid	TRUE	Wellcome Trust	BBSRC	MRC	101472/Z/13/Z	BB/J015881/1	MC_PC_12024
PMC4785718	26854536	10.1021/acs.biochem.5b00838	American Chemical Society (ACS)	Biochemistry	0006-2960, 1520-4995	Crystal structures of Type-11 Inositol Polyphosphate	1611.56	TRUE	not applicable	unknown	cc-by	not applicable	hybrid	TRUE	Wellcome Trust		Canadian Institutes of Health Research	101010	82837	1097737
PMC4878814	27149221	10.1021/acs.biochem.5b01285	American Chemical Society (ACS)	Biochemistry	0006-2960, 1520-4995	Mechanism of the human nucleocytoplasmic hexosaminidase D	3321.46	TRUE	not applicable	unknown	cc-by	not applicable	hybrid	TRUE	Wellcome Trust
PMC4987862	27404282	10.1021/acs.chemrestox.6b00143	American Chemical Society (ACS)	Chemical research in toxicology	0893-228X, 1520-5010	NADH:Cytochrome b5 reductase and cytochrome b5 can act as sole electron donors to human cytochrome P450 1A1-mediated oxidation and DNA adduct formation by benzo[a]pyrene	3473.69	TRUE	not applicable	unknown	cc-by	not applicable	hybrid	TRUE	Cancer Research UK
PMC4869608	27212793	10.1021/acs.chemmater.6b00208	American Chemical Society (ACS)	Chemistry of materials : a publication of the American Chemical Society	0897-4756, 1520-5002	Highly Fluorescent Ribonuclease-A-Encapsulated Lead Sulfide Quantum Dots for Ultrasensitive FluorescenceÂ in VivoÂ Imaging in the Second Near-Infrared Window	1690.26	TRUE	not applicable	unknown	cc-by	not applicable	hybrid	TRUE	Wellcome Trust	0	0
PMC5024651	27656042	10.1021/acs.chemmater.6b01298	American Chemical Society (ACS)	Chemistry of materials : a publication of the American Chemical Society	0897-4756, 1520-5002	An electroconductive hydrogel based on functional poly(ethylenedioxy thiophene)	3615.26	TRUE	not applicable	unknown	cc-by	not applicable	hybrid	TRUE
unknown	26808351	10.1021/acs.jctc.5b00992	American Chemical Society (ACS)	Journal of chemical theory and computation	1549-9618, 1549-9626	Using Local States To Drive the Sampling of Global Conformations in Proteins.	2101.28	FALSE	FALSE	not applicable	unknown	unknown	hybrid	FALSE				FS/12/41/29724
PMC5053573	27219676	10.1021/acs.jmedchem.6b00140	American Chemical Society (ACS)	Journal of medicinal chemistry	0022-2623, 1520-4804	Structure-Based Design of Tetrahydroisoquinoline-7-carboxamides as Selective Discoidin Domain Receptor 1 (DDR1) Inhibitors	457.04	TRUE	not applicable	unknown	cc-by	not applicable	hybrid	TRUE	Wellcome Trust
PMC4441536	25719566	10.1021/jm501963e	American Chemical Society (ACS)	Journal of medicinal chemistry	0022-2623, 1520-4804	Structure Enabled Design of BAZ2-ICR, A Chemical Probe Targeting the Bromodomains of BAZ2A and BAZ2B	1204.19	TRUE	not applicable	unknown	cc-by	not applicable	hybrid	TRUE	Wellcome Trust	Cancer Research UK		090171/Z/09/Z	C309/A11566	C309/A11369
PMC4770307	26367539	10.1021/acs.jmedchem.5b01135	American Chemical Society (ACS)	Journal of medicinal chemistry	0022-2623, 1520-4804	New Synthetic Routes to Triazolo-benzodiazepine Analogues: Expanding the Scope of the Bump-and-Hole Approach for Selective Bromo and Extra-Terminal (BET) Bromodomain Inhibition	1328.84	TRUE	not applicable	unknown	cc-by	not applicable	hybrid	TRUE	Wellcome Trust	BBSRC		100476/Z/12/Z	BB/G023123/1	BB/J001201/2
PMC4885109	27115835	10.1021/acs.jmedchem.6b00065	American Chemical Society (ACS)	Journal of medicinal chemistry	0022-2623, 1520-4804	Rapid Discovery and Structure-Activity Relationships of Pyrazolopyrimidines that Potently Suppress Breast Cancer Cell Growth via SRC Kinase Inhibition with Exceptional Selectivity over ABL Kinase	1402.7	TRUE	not applicable	unknown	cc-by	not applicable	hybrid	TRUE	MRC	Wellcome Trust		MC_PC_U127585840
PMC4770306	26731131	10.1021/acs.jmedchem.5b01719	American Chemical Society (ACS)	Journal of medicinal chemistry	0022-2623, 1520-4804	Structure-Based Identification of Inhibitory Fragments Targeting the p300/CBP-Associated Factor Bromodomain	1664.52	TRUE	not applicable	unknown	cc-by	not applicable	hybrid	TRUE	Wellcome Trust		Canadian Institutes of Health Research	106169	092809/Z/10/Z	unknown
PMC4835159	27002486	10.1021/acs.jmedchem.6b00007	American Chemical Society (ACS)	Journal of medicinal chemistry	0022-2623, 1520-4804	Fragment-Based Approaches to the Development of Mycobacterium tuberculosis CYP121 Inhibitors.	1692.29	TRUE	not applicable	FALSE	cc-by	not applicable	hybrid	TRUE	Wellcome Trust	BBSRC	0	unknown	BB/I019227/1	BB/I019669/1
PMC4770324	26741168	10.1021/acs.jmedchem.5b01635	American Chemical Society (ACS)	Journal of medicinal chemistry	0022-2623, 1520-4804	8-substituted pyrido[3,4-d]pyrimidin-4(3H)-one derivatives as potent, cell permeable, KDM4 (JMJD2) and KDM5 (JARID1) histone demethylase inhibitors	1956.24	TRUE	not applicable	unknown	cc-by	not applicable	hybrid	TRUE	Cancer Research UK			106169	092809/Z/10/Z	EP/L003376/1
PMC4885110	26914985	10.1021/acs.jmedchem.5b01865	American Chemical Society (ACS)	Journal of medicinal chemistry	0022-2623, 1520-4804	Structure-Based Design of an in Vivo Active Selective BRD9 Inhibitor	3385.52	TRUE	not applicable	unknown	cc-by	not applicable	hybrid	TRUE	Wellcome Trust
PMC4601051	26418485	10.1021/acs.jmedchem.5b00596	American Chemical Society (ACS)	Journal of medicinal chemistry	0022-2623, 1520-4804	Discovery of Indoline-2-carboxamide Derivatives as a New Class of Brain-Penetrant Inhibitors of Trypanosoma brucei.	3387.16	TRUE	not applicable	unknown	cc-by	not applicable	hybrid	TRUE	Wellcome Trust			WT077705	WT083481	92340
PMC4947981	27314305	10.1021/acs.jmedchem.6b00028	American Chemical Society (ACS)	Journal of medicinal chemistry	0022-2623, 1520-4804	Trisubstituted Pyrimidines as Efficacious and Fast-Acting Antimalarials.	3569.46	TRUE	not applicable	unknown	cc-by	not applicable	hybrid	TRUE	Wellcome Trust
PMC5108032	27631715	10.1021/acs.jmedchem.6b00723	American Chemical Society (ACS)	Journal of medicinal chemistry	0022-2623, 1520-4804	Discovery of a Quinoline-4-carboxamide Derivative with a Novel Mechanism of Action, Multistage Antimalarial Activity, and Potent in Vivo Efficacy	3934.5	TRUE	not applicable	unknown	cc-by	not applicable	hybrid	TRUE	Wellcome Trust
unknown	26796641	10.1021/acs.jmedchem.5b01685	American Chemical Society (ACS)	Journal of medicinal chemistry	0022-2623, 1520-4804	Discovery of potent, selective and orally bioavailable small-molecule modulators of the mediator complex-associated kinases CDK8 and CDK19	3278.08	FALSE	FALSE	not applicable	unknown	unknown	hybrid	FALSE	Cancer Research UK			C309/A11566	11566
unknown	27119979	10.1021/acs.jmedchem.5b02001	American Chemical Society (ACS)	Journal of medicinal chemistry	0022-2623, 1520-4804	Exploiting protein conformational changes to optimize adenosine-derived inhibitors of HSP70	1032.96	FALSE	FALSE	not applicable	unknown	unknown	hybrid	FALSE	Cancer Research UK
PMC4922733	27117876	10.1021/jacs.6b02464	American Chemical Society (ACS)	Journal of the American Chemical Society	0002-7863, 1520-5126	A Population Shift between Sparsely Populated Folding Intermediates Determines Amyloidogenicity	3390.71	TRUE	not applicable	unknown	cc-by	not applicable	hybrid	TRUE	Wellcome Trust	ERC	0		322408
PMC5010359	27459426	10.1021/jacs.6b05602	American Chemical Society (ACS)	Journal of the American Chemical Society	0002-7863, 1520-5126	Conformational changes in the epidermal growth factor receptor: role of the transmembrane domain investigated by Coarse-Grained metadynamics free energy calculations	4558.57	TRUE	not applicable	unknown	cc-by	not applicable	hybrid	TRUE	Wellcome Trust
PMC4854487	27003358	10.1021/acs.langmuir.6b00240	American Chemical Society (ACS)	Langmuir : the ACS journal of surfaces and colloids	0743-7463, 1520-5827	The Effect of Lipopolysaccharide Core Oligosaccharide Size on the Electrostatic Binding of Antimicrobial Proteins to Models of the Gram Negative Bacterial Outer Membrane	3397.01	TRUE	not applicable	unknown	cc-by	not applicable	hybrid	TRUE	Wellcome Trust			93581
PMC5002933	27109430	10.1021/acs.jpcb.6b01387	American Chemical Society (ACS)	The journal of physical chemistry. B	1520-6106, 1520-5207	Free Energy Landscape of Lipid Interactions with Regulatory Binding Sites on the transmembrane Domain of the EGF Receptor	4086.64	TRUE	not applicable	unknown	cc-by	not applicable	hybrid	TRUE	Wellcome Trust
PMC3636649	23300278	10.2337/db12-1077	American Diabetes Association	Diabetes	0012-1797, 1939-327X	Multi-ethnic genome-wide association study identifies novel locus for type 2 diabetes susceptibility	2640	TRUE	not applicable	FALSE	cc-by-nc-nd	cc-by-nc-nd	hybrid	FALSE	Wellcome Trust			98017	90532	G0801056B
PMC4452716	25510240	10.2337/db14-1388	American Diabetes Association	Diabetes	0012-1797, 1939-327X	Organic Cation Transporter 1 Variants and Gastrointestinal Side Effects of Metformin in Patients with Type 2 Diabetes	1500	TRUE	not applicable	TRUE	non-standard-licence		hybrid	FALSE	Wellcome Trust			102820/Z/13/Z	102820	unknown
PMC4841180	27033835	10.1161/circimaging.115.003579	American Heart Association	Circulation. Cardiovascular imaging	1941-9651, 1942-0080	Athletic Cardiac Adaptation in Males Is a Consequence of Elevated Myocyte Mass	0	TRUE	not applicable	unknown	cc-by	not applicable	hybrid	TRUE	British Heart Foundation	0	0	FS/10/62/28409	PG/14/10/30641	FS/12/88/29474
PMC4596008	26429760	10.1161/circimaging.115.003487	American Heart Association	Circulation. Cardiovascular imaging	1941-9651, 1942-0080	Direct Comparison of Virtual-Histology Intravascular Ultrasound and Optical Coherence Tomography Imaging for Identification of Thin-Cap Fibroatheroma.	2371.54	TRUE	not applicable	unknown	cc-by	not applicable	hybrid	TRUE	Academy of Medical Sciences (AMS)	Department of Health	British Heart Foundation	AMS-SGCL7-Calvert	unknown	FS/13/33/30168
PMC4841180	27033835	10.1161/circimaging.115.003579	American Heart Association	Circulation. Cardiovascular imaging	1941-9651, 1942-0080	Athletic Cardiac Adaptation in Males Is a Consequence of Elevated Myocyte Mass	3826.94	TRUE	not applicable	unknown	cc-by	not applicable	hybrid	TRUE	British Heart Foundation	0	0	FS/10/62/28409	PG/14/10/30641	FS/12/88/29474
	26849616	10.1103/physrevlett.116.038102	American Physical Society (APS)	Physical review letters	0031-9007, 1079-7114	Motility of Colonial Choanoflagellates and the Statistics of Aggregate Random Walkers.	2147.69	FALSE	FALSE	not applicable	unknown	cc-by	hybrid	FALSE	epsrc, erc, wellcome-trust,	0	0	97855
PMC4572456	26126685	10.1152/ajpendo.00594.2014	American Physiological Society	American journal of physiology. Endocrinology and metabolism	0193-1849, 1522-1555	Characterization of lipid metabolism in a novel immortalized human hepatocyte cell line	1557.28	TRUE	not applicable	unknown	cc-by	not applicable	hybrid	TRUE	British Heart Foundation			unknown
PMC4867343	26747496	10.1152/ajpheart.00075.2015	American Physiological Society	American journal of physiology. Heart and circulatory physiology	0363-6135, 1522-1539	Age-related changes in intra-ventricular kinetic energy: a physiological or pathological adaptation?	820.5	TRUE	not applicable	unknown	cc-by	not applicable	hybrid	TRUE	Wellcome Trust	British Heart Foundation		WT 088641/Z/09/Z	NH/11/5/29058	unknown
PMC4796630	26566728	10.1152/ajpheart.00597.2015	American Physiological Society	American journal of physiology. Heart and circulatory physiology	0363-6135, 1522-1539	Altered Na/Ca exchange distribution and activity in ventricular myocytes from failing hearts	1486.38	TRUE	not applicable	unknown	cc-by	not applicable	hybrid	TRUE	British Heart Foundation			PG/10/91/28644	RG/12/10/29802	PG/14/65/31055
PMC5114464	27402665	10.1152/ajpheart.00130.2016	American Physiological Society	American journal of physiology. Heart and circulatory physiology	0363-6135, 1522-1539	Impact of Coronary Bifurcation Morphology on Wave Propagation	1739.26	TRUE	not applicable	unknown	cc-by	not applicable	hybrid	TRUE	British Heart Foundation
PMC4796623	26608338	10.1152/ajpheart.00635.2015	American Physiological Society	American journal of physiology. Heart and circulatory physiology	0363-6135, 1522-1539	Advances and challenges in skeletal muscle angiogenesis	2439.02	TRUE	not applicable	unknown	cc-by	not applicable	hybrid	TRUE	British Heart Foundation	0	0	PG/14/15/30691	U54GM104942	U54 GM104942
PMC4896102	26993521	10.1152/ajplung.00046.2016	American Physiological Society	American journal of physiology. Lung cellular and molecular physiology	1040-0605, 1522-1504	Biosynthesis of the polymeric gel-forming mucin MUC5B.	1717.8	TRUE	not applicable	unknown	cc-by	not applicable	hybrid	TRUE
PMC4796179	26744504	10.1152/japplphysiol.00871.2015	American Physiological Society	Journal of applied physiology (Bethesda, Md. : 1985)	8750-7587, 1522-1601	31P magnetization transfer measurements of Piâ†’ATP flux in exercising human muscle.	1729.61	TRUE	not applicable	unknown	cc-by	not applicable	hybrid	TRUE	Wellcome Trust	0	MRC	93875	91551	G0701532
PMC4269715	25231610	10.1152/jn.00062.2014	American Physiological Society	Journal of neurophysiology	0022-3077, 1522-1598	The binaural masking level difference: cortical correlates persist despite severe brain stem atrophy in progressive supranuclear palsy.	1231.45	TRUE	not applicable	FALSE	cc-by	not applicable	hybrid	TRUE	Wellcome Trust	0	MRC	88324	88263	G0001354
PMC4760470	26510762	10.1152/jn.00691.2015	American Physiological Society	Journal of neurophysiology	0022-3077, 1522-1598	A geometric model of defensive peripersonal space	1305.35	TRUE	not applicable	unknown	cc-by	not applicable	hybrid	TRUE	Wellcome Trust		MRC/EPSRC	unknown	102645	unknown
PMC4969393	27098022	10.1152/jn.00013.2016	American Physiological Society	Journal of neurophysiology	0022-3077, 1522-1598	Brain potentials evoked by intraepidermal electrical stimuli reflect the central sensitization of nociceptive pathways	1646.76	TRUE	not applicable	unknown	cc-by	not applicable	hybrid	TRUE	Wellcome Trust
PMC4922613	26984421	10.1152/jn.00125.2016	American Physiological Society	Journal of neurophysiology	0022-3077, 1522-1598	Local and global contributions to hemodynamic activity in mouse cortex	1683.97	TRUE	not applicable	unknown	cc-by	not applicable	hybrid	TRUE	Wellcome Trust
PMC4961752	27098028	10.1152/jn.00237.2016	American Physiological Society	Journal of neurophysiology	0022-3077, 1522-1598	Neuronal hyperexcitability in the ventral posterior thalamus of neuropathic rats: modality selective effects of pregabalin	1691.38	TRUE	not applicable	unknown	cc-by	not applicable	hybrid	TRUE	Wellcome Trust			102645
PMC4760504	26581867	10.1152/jn.00485.2015	American Physiological Society	Journal of neurophysiology	0022-3077, 1522-1598	Enhanced crosslimb transfer of force-field learning for dynamics that are identical in extrinsic and joint-based coordinates for both limbs.	1729.61	TRUE	not applicable	unknown	cc-by	not applicable	hybrid	TRUE	wellcome-trust,	0	Australian Research Council	97803	unknown
PMC4922602	26912596	10.1152/jn.00829.2015	American Physiological Society	Journal of neurophysiology	0022-3077, 1522-1598	Differential processing of binocular and monocular gloss cues in human visual cortex.	1729.61	TRUE	not applicable	FALSE	cc-by	not applicable	hybrid	TRUE	wellcome-trust,	0	0
PMC4969396	27098024	10.1152/jn.00093.2016	American Physiological Society	Journal of neurophysiology	0022-3077, 1522-1598	A comparison of computational methods for detecting bursts in neuronal spike trains and their application to human stem cell-derived neuronal networks.	1791.18	TRUE	not applicable	FALSE	cc-by	not applicable	hybrid	TRUE	Wellcome Trust	BBSRC	0	93875	BB/H008608/1
PMC5023412	27358315	10.1152/jn.00113.2016	American Physiological Society	Journal of neurophysiology	0022-3077, 1522-1598	Competition between movement plans increases motor variability: evidence of a shared resource for movement planning	1830.42	TRUE	not applicable	unknown	cc-by	not applicable	hybrid	TRUE	Wellcome Trust
PMC4808091	26631145	10.1152/jn.00181.2015	American Physiological Society	Journal of neurophysiology	0022-3077, 1522-1598	Transfer of tactile perceptual learning to untrained neighbouring fingers reflects natural use relationships	1903.06	TRUE	not applicable	unknown	cc-by	not applicable	hybrid	TRUE	Wellcome Trust			104128	104128/Z/14/Z	90955
PMC4757025	26487704	10.1152/physiolgenomics.00054.2015	American Physiological Society	Physiological genomics	1094-8341, 1531-2267	Gene transcripts associated with muscle strength: a CHARGE meta-analysis of 7,781 persons	1601.6	TRUE	not applicable	unknown	cc-by	not applicable	hybrid	TRUE	Wellcome Trust	Other	0	WT097835MF	N01-HC-25195	N01HC25195
PMC4516321	26214215	10.1037/bne0000072	American Psychological Association (APA)	Behavioral neuroscience	0735-7044, 1939-0084	Hippocampal acetylcholine depletion has no effect on anxiety, spatial novelty preference, or differential reward for low rates of responding (DRL) performance in rats	2627.34	TRUE	not applicable	unknown	cc-by	not applicable	hybrid	TRUE	Wellcome Trust	Wellcome Trust		74385	87736
PMC4655861	26595880	10.1037/bne0000108	American Psychological Association (APA)	Behavioral neuroscience	0735-7044, 1939-0084	Heterozygous Deletion of ?-Neurexin I or ?-Neurexin II Results in Behaviors Relevant to Autism and Schizophrenia	3252.02	TRUE	not applicable	unknown	cc-by	not applicable	hybrid	TRUE	MRC	Wellcome Trust	0	G0900625
PMC4655871	26501181	10.1037/bne0000097	American Psychological Association (APA)	Behavioral neuroscience	0735-7044, 1939-0084	Characterization of cognitive deficits in mice with an alternating hemiplegia-linked mutation.	3298.74	TRUE	not applicable	unknown	cc-by	not applicable	hybrid	TRUE	Wellcome Trust	MRC	0	unknown	G0900625	MOP-94856
PMC4450885	26030425	10.1037/bne0000049	American Psychological Association (APA)	Behavioral neuroscience	0735-7044, 1939-0084	Perirhinal cortex lesions in rats: Novelty detection and sensitivity to interference	3428.08	TRUE	not applicable	unknown	cc-by	not applicable	hybrid	TRUE	Wellcome Trust	0	0	103722
PMC4817233	26845505	10.1037/dev0000083	American Psychological Association (APA)	Developmental psychology	0012-1649, 1939-0599	Statistical treatment of looking-time data.	3333.27	TRUE	not applicable	unknown	cc-by	not applicable	hybrid	TRUE	Wellcome Trust	ERC	0	unknown	249519
PMC4577249	25622078	10.1037/hea0000191	American Psychological Association (APA)	Health psychology : official journal of the Division of Health Psychology, American Psychological Association	0278-6133, 1930-7810	Smoker identity and its potential role in young adultsÂ’ smoking behaviour: a meta-ethnography	3363.17	TRUE	not applicable	unknown	cc-by	not applicable	hybrid	TRUE	Cancer Research UK			MR/K023195/1	ES/G007489/1
PMC4976760	27505409	10.1037/abn0000182	American Psychological Association (APA)	Journal of abnormal psychology	0021-843X, 1939-1846	Â‘Theory of MindÂ’ is not Theory of Emotion: A cautionary note on the Reading the Mind in the Eyes Test	3572.01	TRUE	not applicable	unknown	cc-by	not applicable	hybrid	TRUE	Wellcome Trust
PMC4352962	25244390	10.1037/a0037981	American Psychological Association (APA)	Journal of consulting and clinical psychology	0022-006X, 1939-2117	Post-treatment motivation and alcohol treatment outcome 9 months later: findings from structural equation modelling.	2682.58	TRUE	not applicable	unknown	cc-by	not applicable	hybrid	TRUE	Wellcome Trust			WT086516MA	G9700729
PMC4655869	26302249	10.1037/ccp0000027	American Psychological Association (APA)	Journal of consulting and clinical psychology	0022-006X, 1939-2117	Mindfulness-Based Cognitive Therapy (MBCT) Reduces the Association Between Depressive Symptoms and Suicidal Cognitions in Patients With a History of Suicidal Depression	3204.97	TRUE	not applicable	unknown	cc-by	not applicable	hybrid	TRUE	Wellcome Trust			GR067797
PMC4961070	27454040	10.1037/xge0000180	American Psychological Association (APA)	Journal of experimental psychology. General	0096-3445, 1939-2222	The perceptual and social components of metacognition	3067.19	TRUE	not applicable	unknown	cc-by	not applicable	hybrid	TRUE	Wellcome Trust			91593
PMC4755819	26726916	10.1037/xge0000133	American Psychological Association (APA)	Journal of experimental psychology. General	0096-3445, 1939-2222	Exploratory decision-making as a function of lifelong experience, not cognitive decline	3372.35	TRUE	not applicable	unknown	cc-by	not applicable	hybrid	TRUE	Wellcome Trust			WT106931MA	AG043425	R01 AG043425
PMC4763252	26480248	10.1037/xhp0000147	American Psychological Association (APA)	Journal of experimental psychology. Human perception and performance	0096-1523, 1939-1277	Sound segregation via embedded Repetition is robust to inattention	3386.87	TRUE	not applicable	unknown	cc-by	not applicable	hybrid	TRUE	Wellcome Trust			093292/Z/10/Z
PMC4873047	26752732	10.1037/xhp0000194	American Psychological Association (APA)	Journal of experimental psychology. Human perception and performance	0096-1523, 1939-1277	Interaction between object-based attention and pertinence values shapes the attentional priority map of a multielement display	3633.34	TRUE	not applicable	unknown	cc-by	not applicable	hybrid	TRUE	Wellcome Trust
unknown	27668485	10.1037/xlm0000328	American Psychological Association (APA)	Journal of experimental psychology. Learning, memory, and cognition	0278-7393, 1939-1285	Rapid Forgetting Results From Competition Over Time Between Items in Visual Working Memory	3806.14	FALSE	TRUE	not applicable	unknown	unknown	hybrid	FALSE	Wellcome Trust
PMC4886836	26866836	10.1037/fam0000188	American Psychological Association (APA)	Journal of family psychology : JFP : journal of the Division of Family Psychology of the American Psychological Association (Division 43)	0893-3200, 1939-1293	Single mothers by choice: Mother-child relationships and children's psychological adjustment	3650.76	TRUE	not applicable	unknown	cc-by	not applicable	hybrid	TRUE	wellcome-trust,
PMC4768598	26752123	10.1037/neu0000240	American Psychological Association (APA)	Neuropsychology	0894-4105, 1931-1559	The Doors and People Test: The effect of frontal lobe lesions on recall and recognition memory performance	3397.28	TRUE	not applicable	unknown	cc-by	not applicable	hybrid	TRUE	Wellcome Trust			66763	089231/A/09/Z
PMC4824243	26727308	10.1037/bul0000037	American Psychological Association (APA)	Psychological bulletin	0033-2909, 1939-1455	Oral language deficits in familial dyslexia: A meta-analysis and review	3633.34	TRUE	not applicable	unknown	cc-by	not applicable	hybrid	TRUE	Wellcome Trust			WT082036AIA
PMC4976797	27294712	10.1037/pag0000105	American Psychological Association (APA)	Psychology and aging	0882-7974, 1939-1498	Temporal Orienting of Attention can be Preserved in Normal Aging	3592.48	TRUE	not applicable	unknown	cc-by	not applicable	hybrid	TRUE	Wellcome Trust
PMC4476608	25961147	10.1037/adb0000058	American Psychological Association (APA)	Psychology of addictive behaviors : journal of the Society of Psychologists in Addictive Behaviors	0893-164X, 1939-1501	The role of the working alliance treatment for alcohol problems.	2549.23	TRUE	not applicable	unknown	cc-by	not applicable	hybrid	TRUE	Wellcome Trust	MRC		WT086516MA	G9700729
PMC4813692	26385339	10.1074/mcp.m115.048504	American Society for Biochemistry & Molecular Biology (ASBMB)	Molecular & cellular proteomics : MCP	1535-9476, 1535-9484	Serum Albumin Domain Structures in Human Blood Serum by Mass Spectrometry and Computational Biology	987	TRUE	not applicable	unknown	cc-by	not applicable	hybrid	TRUE	Wellcome Trust			JR 084229	103139	92076
PMC4937518	27114452	10.1074/mcp.o115.055467	American Society for Biochemistry & Molecular Biology (ASBMB)	Molecular & cellular proteomics : MCP	1535-9476, 1535-9484	Global Membrane Protein Interactome Analysis using In vivo Crosslinking and Mass Spectrometry-based Protein Correlation Profiling.	1037.27	TRUE	not applicable	unknown	cc-by	not applicable	hybrid	TRUE	Wellcome Trust
PMC4974347	27250206	10.1074/mcp.m115.056473	American Society for Biochemistry & Molecular Biology (ASBMB)	Molecular & cellular proteomics : MCP	1535-9476, 1535-9484	Structure of complement C3(H2O) revealed by quantitative cross-linking/mass spectrometry and modelling	1147.64	TRUE	not applicable	unknown	cc-by	not applicable	hybrid	TRUE	Wellcome Trust			294809	R01 GM083960	BB/I007946/1
PMC4974350	27302889	10.1074/mcp.m115.056481	American Society for Biochemistry & Molecular Biology (ASBMB)	Molecular & cellular proteomics : MCP	1535-9476, 1535-9484	Quantitative cross-linking/mass spectrometry using isotopelabeled cross-linkers and MaxQuant	1156.82	TRUE	not applicable	unknown	cc-by	not applicable	hybrid	TRUE	Wellcome Trust
PMC4974353	27231315	10.1074/mcp.m116.057885	American Society for Biochemistry & Molecular Biology (ASBMB)	Molecular & cellular proteomics : MCP	1535-9476, 1535-9484	Proteomics analysis with a nano Random Forest approach reveals novel functional interactions regulated by SMC complexes on mitotic chromosomes	1465.84	TRUE	not applicable	unknown	cc-by	not applicable	hybrid	TRUE	Wellcome Trust
PMC4739672	26685126	10.1074/mcp.m115.051649	American Society for Biochemistry & Molecular Biology (ASBMB)	Molecular & cellular proteomics : MCP	1535-9476, 1535-9484	Analysis of signaling endosome composition and dynamics using SILAC in embryonic stem cell-derived neurons	1731.4	TRUE	not applicable	unknown	cc-by	not applicable	hybrid	TRUE	Wellcome Trust	MRC	CRUK	10011	10002
PMC5013309	27384951	10.1074/mcp.m116.058552	American Society for Biochemistry & Molecular Biology (ASBMB)	Molecular & cellular proteomics : MCP	1535-9476, 1535-9484	Hvint: A strategy for identifying novel protein-protein interactions in herpes simplex virus type 1	1903.06	TRUE	not applicable	unknown	cc-by	not applicable	hybrid	TRUE	Wellcome Trust	MRC			G0600084	MR/M019292/1
PMC4638040	26330542	10.1074/mcp.m115.051169	American Society for Biochemistry & Molecular Biology (ASBMB)	Molecular & cellular proteomics : MCP	1535-9476, 1535-9484	ProteinÂ–Protein Interactions Modulate the Docking-Dependent E3-Ubiquitin Ligase Activity of Carboxy-Terminus of Hsc70-Interacting Protein (CHIP)	1351.94	TRUE	not applicable	FALSE	unknown	non-standard-licence	hybrid	FALSE	Cancer Research UK			92076	C377/A6355
PMC4933154	27129275	10.1074/jbc.m116.714790	American Society for Biochemistry & Molecular Biology (ASBMB)	The Journal of biological chemistry	0021-9258, 1083-351X	?-aminobutyric acid type A (GABAA) receptor subunits play a direct structural role in synaptic contact formation via their N-terminal extracellular domains	1123.45	TRUE	not applicable	unknown	cc-by	not applicable	hybrid	TRUE	Wellcome Trust	MRC			G0800498
PMC5034038	27489103	10.1074/jbc.m116.737270	American Society for Biochemistry & Molecular Biology (ASBMB)	The Journal of biological chemistry	0021-9258, 1083-351X	The CaVbeta subunit protects the I-II loop of the voltage-gated calcium channel, CaV2.2, from proteasomal degradation but not oligo-ubiquitination	1165.39	TRUE	not applicable	unknown	cc-by	not applicable	hybrid	TRUE	Wellcome Trust
PMC4646403	26378228	10.1074/jbc.m115.679019	American Society for Biochemistry & Molecular Biology (ASBMB)	The Journal of biological chemistry	0021-9258, 1083-351X	Identification of the ISWI chromatin remodeling complex of the early branching eukaryote Trypanosoma brucei	1165.5	TRUE	not applicable	unknown	cc-by	not applicable	hybrid	TRUE	Wellcome Trust	BBSRC		unknown	BB/J01477X/1
PMC4646915	26363064	10.1074/jbc.m115.688234	American Society for Biochemistry & Molecular Biology (ASBMB)	The Journal of biological chemistry	0021-9258, 1083-351X	A Cell-based Fluorescence Resonance Energy Transfer (FRET) Sensor Reveals Inter- and Intragenogroup Variations in Norovirus Protease Activity and Polyprotein Cleavage.	1173.17	TRUE	not applicable	unknown	cc-by	not applicable	hybrid	TRUE	Wellcome Trust	0	0	97997	WT097997MA
PMC4813486	26655720	10.1074/jbc.m115.691063	American Society for Biochemistry & Molecular Biology (ASBMB)	The Journal of biological chemistry	0021-9258, 1083-351X	Uncovering the early assembly mechanism for amyloidogenic ÃŸ2-microglobulin using cross-linking and native mass spectrometry	1209.2	TRUE	not applicable	unknown	cc-by	not applicable	hybrid	TRUE	Wellcome Trust
PMC4813548	26668320	10.1074/jbc.m115.694372	American Society for Biochemistry & Molecular Biology (ASBMB)	The Journal of biological chemistry	0021-9258, 1083-351X	Perturbation of Critical Prolines in Gloeobacter violaceus Ligand-gated Ion Channel (GLIC) Supports Conserved Gating Motions among Cys-loop Receptors.	1245.96	TRUE	not applicable	unknown	cc-by	not applicable	hybrid	TRUE	Wellcome Trust	0	0	WT 81925	GM07616	NS 34407
PMC4933465	27044744	10.1074/jbc.m116.720953	American Society for Biochemistry & Molecular Biology (ASBMB)	The Journal of biological chemistry	0021-9258, 1083-351X	The Anti-inflammatory Protein TSG-6 Regulates Chemokine Function by Inhibiting Chemokine/Glycosaminoglycan Interactions.	1258.72	TRUE	not applicable	unknown	cc-by	not applicable	hybrid	TRUE	Arthritis Research UK			18472	20347	R01 HL107652
PMC4919433	27129261	10.1074/jbc.m115.700609	American Society for Biochemistry & Molecular Biology (ASBMB)	The Journal of biological chemistry	0021-9258, 1083-351X	Human platelets utilize cycloxygenase-1 to generate dioxolane A3, a neutrophil activating eicosanoid.	1259	TRUE	not applicable	unknown	cc-by	not applicable	hybrid	TRUE	British Heart Foundation	0	0	RG/12/11/29815
PMC4813465	26679998	10.1074/jbc.m115.700385	American Society for Biochemistry & Molecular Biology (ASBMB)	The Journal of biological chemistry	0021-9258, 1083-351X	Selective inhibition of the mitochondrial permeability transition pore protects against neuro-degeneration in experimental multiple sclerosis.	1268.95	TRUE	not applicable	unknown	cc-by	not applicable	hybrid	TRUE	Wellcome Trust	MRC	British Heart Foundation	90940	unknown	unknown
PMC4705968	26438825	10.1074/jbc.m115.684076	American Society for Biochemistry & Molecular Biology (ASBMB)	The Journal of biological chemistry	0021-9258, 1083-351X	Two-pore Channels (TPC2s) and Nicotinic Acid Adenine Dinucleotide Phosphate (NAADP) at Lysosomal-Sarcoplasmic Reticular Junctions Contribute to Acute and Chronic ?-Adrenoceptor Signaling in the Heart	1340.21	TRUE	not applicable	unknown	cc-by	not applicable	hybrid	TRUE	Wellcome Trust	British Heart Foundation	British Heart Foundation	unknown	102828	BB/G008523/1
PMC4919432	27129217	10.1074/jbc.m115.708263	American Society for Biochemistry & Molecular Biology (ASBMB)	The Journal of biological chemistry	0021-9258, 1083-351X	The dimeric architecture of checkpoint kinases Mec1ATR and Tel1ATM reveal a common structural organisation.	1346.51	TRUE	not applicable	unknown	cc-by	not applicable	hybrid	TRUE				R01 GM083970
PMC4683255	26491011	10.1074/jbc.m115.689596	American Society for Biochemistry & Molecular Biology (ASBMB)	The Journal of biological chemistry	0021-9258, 1083-351X	Evidence for a Functional O-Linked N-Acetylglucosamine (O-GlcNAc) System in the Thermophilic Bacterium Thermobaculum terrenum.	1350	TRUE	not applicable	unknown	cc-by	not applicable	hybrid	TRUE	Wellcome Trust			WT087590MA	87590	MR/M004139/1
PMC4742742	26627825	10.1074/jbc.m115.678359	American Society for Biochemistry & Molecular Biology (ASBMB)	The Journal of biological chemistry	0021-9258, 1083-351X	Extracellular Fibrinogen-binding Protein (Efb) from Staphylococcus aureus Inhibits the Formation of Platelet-Leukocyte Complexes	1356.94	TRUE	not applicable	unknown	cc-by	not applicable	hybrid	TRUE	British Heart Foundation			ZR-W0258A	BB/J002690/1	BB/J008176/1
PMC5025681	27435674	10.1074/jbc.m115.710673	American Society for Biochemistry & Molecular Biology (ASBMB)	The Journal of biological chemistry	0021-9258, 1083-351X	Tumor Necrosis Factor-stimulated Gene-6 (TSG-6) Is Constitutively Expressed in Adult Central Nervous System (CNS) and Associated with Astrocyte-mediated Glial Scar Formation following Spinal Cord Injury.	1365.4	TRUE	not applicable	unknown	cc-by	not applicable	hybrid	TRUE				P01 HL107147
PMC5016126	27302065	10.1074/jbc.m116.730168	American Society for Biochemistry & Molecular Biology (ASBMB)	The Journal of biological chemistry	0021-9258, 1083-351X	Mammalian Glucose Transporter Activity is Dependent upon Anionic and Conical Phospholipids	1367.57	TRUE	not applicable	unknown	cc-by	not applicable	hybrid	TRUE	Wellcome Trust	Wellcome Trust
PMC4807253	26742848	10.1074/jbc.m115.691048	American Society for Biochemistry & Molecular Biology (ASBMB)	The Journal of biological chemistry	0021-9258, 1083-351X	Conserved Amphipathic Helices Mediate Lipid Droplet Targeting of Perilipins 1-3.	1370.14	TRUE	not applicable	unknown	cc-by	not applicable	hybrid	TRUE	Wellcome Trust	0	0	107064	91551	MC_UU_12012/5
PMC5016179	27325704	10.1074/jbc.m116.733576	American Society for Biochemistry & Molecular Biology (ASBMB)	The Journal of biological chemistry	0021-9258, 1083-351X	Calmodulin regulates human ether a go-go 1 (hEAG1) potassium channels through interactions of the eag-domain with the cyclic nucleotide binding homology domain	1374.7	TRUE	not applicable	unknown	cc-by	not applicable	hybrid	TRUE	British Heart Foundation			PG/11/38/28886	BB/K000128/1
PMC4938178	27226558	10.1074/jbc.m116.714766	American Society for Biochemistry & Molecular Biology (ASBMB)	The Journal of biological chemistry	0021-9258, 1083-351X	Cellular case in kinase 2 and protein phosphatase 2A modulate replication site assembly of Bluetongue virus.	1378.17	TRUE	not applicable	unknown	cc-by	not applicable	hybrid	TRUE	Wellcome Trust
PMC4933286	27036941	10.1074/jbc.m115.700856	American Society for Biochemistry & Molecular Biology (ASBMB)	The Journal of biological chemistry	0021-9258, 1083-351X	Entry of Bluetongue virus capsid requires the late endosomal specific lipid lysobisphosphatidic acid.	1391.79	TRUE	not applicable	unknown	cc-by	not applicable	hybrid	TRUE	Wellcome Trust
PMC4813561	26811337	10.1074/jbc.m115.691113	American Society for Biochemistry & Molecular Biology (ASBMB)	The Journal of biological chemistry	0021-9258, 1083-351X	Low pH and Anionic Lipid Dependent Fusion of Uukuniemi Phelebovirus to Liposomes	1417.84	TRUE	not applicable	unknown	cc-by	not applicable	hybrid	TRUE	Wellcome Trust	Wellcome Trust	Wellcome Trust	090532/Z/09/Z	093305/Z/10/Z	060208/Z/00/Z
PMC5000080	27281824	10.1074/jbc.m115.690651	American Society for Biochemistry & Molecular Biology (ASBMB)	The Journal of biological chemistry	0021-9258, 1083-351X	Mechanism of Histone H3K4me3 Recognition by the Plant Homeodomain of Inhibitor of Growth 3	1419.47	TRUE	not applicable	unknown	cc-by	not applicable	hybrid	TRUE	Wellcome Trust			2013MAYSP005	2013MaySP005	P41 GM103399
PMC4919465	27189951	10.1074/jbc.m116.733246	American Society for Biochemistry & Molecular Biology (ASBMB)	The Journal of biological chemistry	0021-9258, 1083-351X	A Gene of the ?3-Glycosyltransferase Family Encodes N-Acetylglucosaminyltransferase II Function in Trypanosoma brucei.	1437.31	TRUE	not applicable	unknown	cc-by	not applicable	hybrid	TRUE	Wellcome Trust
PMC4571866	26152717	10.1074/jbc.m115.671248	American Society for Biochemistry & Molecular Biology (ASBMB)	The Journal of biological chemistry	0021-9258, 1083-351X	Nicotinic Acid Adenine Dinucleotide Phosphate (NAADP) and Endolysosomal Two-pore Channels Modulate Membrane Excitability and Stimulus-Secretion Coupling in Mouse Pancreatic ? Cells*	1535.82	TRUE	not applicable	unknown	cc-by	not applicable	hybrid	TRUE	Wellcome Trust			unknown	98424	95531
PMC4722457	26620565	10.1074/jbc.m115.685578	American Society for Biochemistry & Molecular Biology (ASBMB)	The Journal of biological chemistry	0021-9258, 1083-351X	Transcriptional Regulation of Cystathionine--Lyase in Endothelial Cells by NADPH Oxidase 4-Dependent Signaling*	1559.52	TRUE	not applicable	unknown	cc-by	not applicable	hybrid	TRUE	British Heart Foundation			FS/11/80/29330	FS/14/1/30551	G0600785
PMC4661386	26468290	10.1074/jbc.m115.669838	American Society for Biochemistry & Molecular Biology (ASBMB)	The Journal of biological chemistry	0021-9258, 1083-351X	Metal Ion-dependent Heavy Chain Transfer Activity of TSG-6 Mediates Assembly of the Cumulus-Oocyte Matrix.	1582.16	TRUE	not applicable	unknown	cc-by	not applicable	hybrid	TRUE	Wellcome Trust	Arthritis Research UK	MRC	88785	18472	MC_U138274352
PMC4598998	26296884	10.1074/jbc.m115.667246	American Society for Biochemistry & Molecular Biology (ASBMB)	The Journal of biological chemistry	0021-9258, 1083-351X	Striking Oxygen Sensitivity of the Peptidylglycine ?-Amidating Monooxygenase (PAM) in Neuroendocrine Cells*	1592.01	TRUE	not applicable	unknown	cc-by	not applicable	hybrid	TRUE	Wellcome Trust			unknown	DK032949	R01 DK032949
PMC4705923	26483544	10.1074/jbc.m115.683268	American Society for Biochemistry & Molecular Biology (ASBMB)	The Journal of biological chemistry	0021-9258, 1083-351X	Structural insights into the MMACHC-MMADHC protein complex involved in vitamin B12 trafficking	1608.25	TRUE	not applicable	unknown	cc-by	not applicable	hybrid	TRUE	Wellcome Trust			106169	092809/Z/10/Z	1368548
PMC4742757	26631724	10.1074/jbc.m115.683292	American Society for Biochemistry & Molecular Biology (ASBMB)	The Journal of biological chemistry	0021-9258, 1083-351X	The Prodomain-bound Form of Bone Morphogenetic Protein 10 Is Biologically Active on Endothelial Cells.	1633.32	TRUE	not applicable	unknown	cc-by	not applicable	hybrid	TRUE	British Heart Foundation	0	0	CH/09/001/25945	PG/12/54/29734	PG/11/10/28724
PMC4861490	26953346	10.1074/jbc.m115.708057	American Society for Biochemistry & Molecular Biology (ASBMB)	The Journal of biological chemistry	0021-9258, 1083-351X	Superoxide Dismutase (SOD)-mimetic M40403 Is Protective in Cell and Fly Models of Paraquat Toxicity IMPLICATIONS FOR PARKINSON DISEASE	1691.57	TRUE	not applicable	unknown	cc-by	not applicable	hybrid	TRUE	The Wellcome Trust			309742
PMC4807256	26851275	10.1074/jbc.r115.692715	American Society for Biochemistry & Molecular Biology (ASBMB)	The Journal of biological chemistry	0021-9258, 1083-351X	Insights into Coupled Folding and Binding Mechanisms from Kinetic Studies.	1729.61	TRUE	not applicable	FALSE	cc-by	not applicable	hybrid	TRUE	Wellcome Trust	0	0	095195MA	unknown	1348064
PMC4861494	26917727	10.1074/jbc.m116.722066	American Society for Biochemistry & Molecular Biology (ASBMB)	The Journal of biological chemistry	0021-9258, 1083-351X	Characterization of a Putative Receptor Binding Surface onSkint-1, a Critical Determinant of Dendritic Epidermal T cell Selection	1733.65	TRUE	not applicable	unknown	cc-by	not applicable	hybrid	TRUE	Wellcome Trust	0	0
PMC4861463	26917722	10.1074/jbc.m115.707414	American Society for Biochemistry & Molecular Biology (ASBMB)	The Journal of biological chemistry	0021-9258, 1083-351X	A molecular switch abrogates gp100 TCR-targeting of a human melanoma antigen	1740.26	TRUE	not applicable	unknown	cc-by	not applicable	hybrid	TRUE	Wellcome Trust	0	0	1247762
PMC4919469	27129201	10.1074/jbc.m116.724294	American Society for Biochemistry & Molecular Biology (ASBMB)	The Journal of biological chemistry	0021-9258, 1083-351X	Investigation of the Interaction between Cdc42 and Its Effector TOCA1: HANDOVER OF Cdc42 TO THE ACTIN REGULATOR N-WASP IS FACILITATED BY DIFFERENTIAL BINDING AFFINITIES.	1797.08	TRUE	not applicable	FALSE	cc-by	not applicable	hybrid	TRUE	Wellcome Trust	ERC	0
PMC4965579	27226629	10.1074/jbc.m116.734020	American Society for Biochemistry & Molecular Biology (ASBMB)	The Journal of biological chemistry	0021-9258, 1083-351X	The Coronary Artery Disease Associated Coding Variant in Zinc finger C3HC-type containing 1 (ZC3HC1) Affects Cell Cycle Regulation	1809	TRUE	not applicable	unknown	cc-by	not applicable	hybrid	TRUE	British Heart Foundation
PMC4223318	25237187	10.1074/jbc.m114.579771	American Society for Biochemistry & Molecular Biology (ASBMB)	The Journal of biological chemistry	0021-9258, 1083-351X	Regulation of bone morphogenetic protein 9 (BMP9) by redox-dependent proteolysis.	1893.65	TRUE	not applicable	unknown	cc-by	not applicable	hybrid	TRUE	British Heart Foundation	0	0	CH/09/001/25945	G1000847	RG/13/4/30107
PMC4850293	26861876	10.1074/jbc.m115.692368	American Society for Biochemistry & Molecular Biology (ASBMB)	The Journal of biological chemistry	0021-9258, 1083-351X	Reduced Ets domain-containing protein Elk1 Promotes Pulmonary Fibrosis via Increased Integrin ?v?6 Expression	1977.02	TRUE	not applicable	unknown	cc-by	not applicable	hybrid	TRUE	Wellcome Tust	Other	0	NC/K500501/1	G1100564/1
PMC5076510	27484800	10.1074/jbc.m116.736942	American Society for Biochemistry & Molecular Biology (ASBMB)	The Journal of biological chemistry	0021-9258, 1083-351X	Ligand-induced Epitope Masking: DISSOCIATION OF INTEGRIN Î±5Î²1-FIBRONECTIN COMPLEXES ONLY BY MONOCLONAL ANTIBODIES WITH AN ALLOSTERIC MODE OF ACTION.	1981.79	TRUE	not applicable	unknown	cc-by	not applicable	hybrid	TRUE
PMC5033939	27699224	10.1172/jci.insight.87908	American Society for Clinical Investigation	JCI insight	2379-3708	Systemic restoration of UBA1 is a viable treatment for spinal muscular atrophy	2354.14	TRUE	not applicable	unknown	cc-by	not applicable	hybrid	TRUE	Wellcome Trust
PMC4889020	27275013	10.1172/jci.insight.86375	American Society for Clinical Investigation	JCI insight	2379-3708	Three-Dimensional Characterisation of Fibroblast Foci in Idiopathic Pulmonary Fibrosis	2502.6	TRUE	not applicable	unknown	cc-by	not applicable	hybrid	TRUE	Wellcome Trust	EPSRC	0
PMC5033815	27699259	10.1172/jci.insight.85768	American Society for Clinical Investigation	JCI insight	2379-3708	Microvascular resistance of the culprit coronary artery in acute ST-elevation myocardial infarction	2494.45	TRUE	not applicable	FALSE	unknown	unknown	hybrid	FALSE	British Heart Foundation (BHF)	British Heart Foundation (BHF)		PG/11/2/28474	FS/12/62/29889
PMC4887172	27140401	10.1172/jci85715	American Society for Clinical Investigation	The Journal of clinical investigation	0021-9738, 1558-8238	Clinical iron deficiency disturbs normal human responses to hypoxia	3123.05	TRUE	not applicable	unknown	cc-by	not applicable	hybrid	TRUE	British Heart Foundation
PMC4966301	27400125	10.1172/jci85794	American Society for Clinical Investigation	The Journal of clinical investigation	0021-9738, 1558-8238	EPHB4 kinase inactivating mutations cause autosomal dominant lymphatic-related hydrops fetalis	3403.94	TRUE	not applicable	unknown	cc-by	not applicable	hybrid	TRUE	British Heart Foundation	British Heart Foundation		K99 HL119617	F32 HL110473
PMC4665792	26571395	10.1172/jci79070	American Society for Clinical Investigation	The Journal of clinical investigation	0021-9738, 1558-8238	Inflammation drives thrombosis after Salmonella infection via CLEC-2 on platelets	3584.47	TRUE	not applicable	FALSE	unknown	unknown	hybrid	FALSE	British Heart Foundation	Wellcome Trust	MRC; BBSRC	90244	88410	19791
PMC4704153	26525783	10.1128/aac.02207-15	American Society for Microbiology	Antimicrobial agents and chemotherapy	0066-4804, 1098-6596	Expression of Plasmodium vivax crt-o is Related to Parasite Stage but Not Ex Vivo Chloroquine Susceptibility	1669.11	TRUE	not applicable	unknown	cc-by	not applicable	hybrid	TRUE	Wellcome Trust			91625
PMC4958194	27246777	10.1128/aac.00840-16	American Society for Microbiology	Antimicrobial agents and chemotherapy	0066-4804, 1098-6596	First Report of blaIMP-14 on a Plasmid Harboring Multiple Drug Resistance Genes in Escherichia coli Sequence Type 131	2029.92	TRUE	not applicable	unknown	cc-by	not applicable	hybrid	TRUE	Wellcome Trust
PMC4879409	27067320	10.1128/aac.00464-16	American Society for Microbiology	Antimicrobial agents and chemotherapy	0066-4804, 1098-6596	Mobility at nested genetic levels drives rapid dissemination of the carbapenem resistance gene blaKPC	2056.67	TRUE	not applicable	unknown	cc-by	not applicable	hybrid	TRUE	Wellcome Trust
PMC4879365	27021327	10.1128/aac.00253-16	American Society for Microbiology	Antimicrobial agents and chemotherapy	0066-4804, 1098-6596	dfrA thyA Double Deletion in para-Aminosalicylic Acid-Resistant Mycobacterium tuberculosis Beijing Strains.	2515.34	TRUE	not applicable	FALSE	cc-by	not applicable	hybrid	TRUE	Wellcome Trust	0	0	98600
PMC4997829	27324769	10.1128/aac.00393-16	American Society for Microbiology	Antimicrobial agents and chemotherapy	0066-4804, 1098-6596	Wild-Type and Non-Wild-Type Mycobacterium tuberculosis MIC Distributions for the Novel Fluoroquinolone Antofloxacin Compared with Those for Ofloxacin, Levofloxacin, and Moxifloxacin.	2715.57	TRUE	not applicable	FALSE	cc-by	not applicable	hybrid	TRUE	wellcome-trust,	0	0	98600
PMC4808222	26787694	10.1128/aac.02441-15	American Society for Microbiology	Antimicrobial agents and chemotherapy	0066-4804, 1098-6596	Selective conditions for a multidrug resistance plasmid depend on the sociality of antibiotic resistance	2773.57	TRUE	not applicable	unknown	cc-by	not applicable	hybrid	TRUE	Wellcome Trust	0	0	WT095024MA	311490
PMC4808186	26833150	10.1128/aac.02109-15	American Society for Microbiology	Antimicrobial agents and chemotherapy	0066-4804, 1098-6596	Untargeted metabolomics to ascertain antibiotic modes of action	2813.5	TRUE	not applicable	FALSE	cc-by-nc-sa	cc-by-nc-sa	hybrid	FALSE	Wellcome Trust (WELLCOME)	Wellcome Trust (WELLCOME)		104111/Z/14/Z
PMC4959481	26873321	10.1128/aem.03693-15	American Society for Microbiology	Applied and environmental microbiology	0099-2240, 1098-5336	Genetic Diversity of Campylobacter jejuni and Campylobacter coli Isolates from Conventional Broiler Flocks and the impacts of Sampling Strategy and Laboratory Method	2500.87	TRUE	not applicable	unknown	cc-by	not applicable	hybrid	TRUE	Wellcome Trust			87622
PMC4744922	26581890	10.1128/cvi.00564-15	American Society for Microbiology	Clinical and vaccine immunology : CVI	1556-6811, 1556-679X	Lymphocyte Perturbations in Malawian Children with Severe and Uncomplicated Malaria	1727.54	TRUE	not applicable	unknown	cc-by	not applicable	hybrid	TRUE	Wellcome Trust			067902/Z/02/Z	074124/Z/04/Z
PMC4933780	27170644	10.1128/cvi.00128-16	American Society for Microbiology	Clinical and vaccine immunology : CVI	1556-6811, 1556-679X	Cytokine profiles during invasive nontyphodial Salmonella disease predict outcome in African children	2200.4	TRUE	not applicable	unknown	cc-by	not applicable	hybrid	TRUE	Wellcome Trust
PMC358319	8055469	10.1128/cmr.7.2.213	American Society for Microbiology	Clinical microbiology reviews	0893-8512, 1098-6618	Relationship between HIV-1 co-infection, IL-10, and M. tuberculosis in human lymph node granulomas	2625.6	TRUE	not applicable	FALSE	unknown	unknown	hybrid	FALSE				R01-AI20900
PMC4807482	26787719	10.1128/iai.01423-15	American Society for Microbiology	Infection and immunity	0019-9567, 1098-5522	Genes Required for the Fitness of Salmonella enterica Serovar Typhimurium during Infection of Immunodeficient gp91-/- phox Mice.	2063.45	TRUE	not applicable	FALSE	cc-by	not applicable	hybrid	TRUE	Wellcome Trust	BBSRC	MRC	WT098051	APG19115	G1100102
PMC4936369	27185791	10.1128/iai.00062-16	American Society for Microbiology	Infection and immunity	0019-9567, 1098-5522	Clustered intracellular Salmonella Typhimurium Blocks Host Cell Cytokinesis	2473.38	TRUE	not applicable	unknown	cc-by	not applicable	hybrid	TRUE				MR/K027077/1
PMC4944223	27185829	10.1128/jb.00116-16	American Society for Microbiology	Journal of bacteriology	0021-9193, 1098-5530	Identification of a lipoteichoic acid glycosyltransferase enzyme reveals that GW-domain containing proteins can be retained in the cell wall of Listeria monocytogenes in the absence of lipoteichoic acid or its modifications	1843.13	TRUE	not applicable	unknown	cc-by	not applicable	hybrid	TRUE
PMC4686210	26195599	10.1128/jb.00480-15	American Society for Microbiology	Journal of bacteriology	0021-9193, 1098-5530	Binding of c-di-AMP to the Staphylococcus aureus sensor kinase KdpD occurs via the USP domain and down-regulates the expression of the Kdp potassium transporter.	1895.88	TRUE	not applicable	unknown	cc-by	not applicable	hybrid	TRUE	Wellcome Trust			100289
PMC4686194	26013485	10.1128/jb.00321-15	American Society for Microbiology	Journal of bacteriology	0021-9193, 1098-5530	Secreted Cyclic Di-GMP Induces Stalk Cell Differentiation in the Eukaryote Dictyostelium discoideum.	2179.15	TRUE	not applicable	unknown	cc-by	not applicable	hybrid	TRUE	Wellcome Trust		BBSRC	100293/Z/12/Z	100293	BB/K000799/1
PMC4844738	26962081	10.1128/jcm.03142-15	American Society for Microbiology	Journal of clinical microbiology	0095-1137, 1098-660X	Capsular typing method for streptococcus agalactiae Using whole genome sequences data	1561.52	TRUE	not applicable	unknown	cc-by	not applicable	hybrid	TRUE	Wellcome Trust			G0800778
PMC4609728	26354815	10.1128/jcm.01066-15	American Society for Microbiology	Journal of clinical microbiology	0095-1137, 1098-660X	The utility of Whole Genome Sequencing of Escherichia coli O157 for outbreak detection and epidemiological surveillance	1973.52	TRUE	not applicable	unknown	cc-by	not applicable	hybrid	TRUE	Wellcome Trust			95831
PMC5121376	27629899	10.1128/JCM.00881-16	American Society for Microbiology	Journal of clinical microbiology	0095-1137, 1098-660X	Resolution of a protracted serogroup B meningococcal outbreak with whole genome sequencing shows inter species genetic transfer	2166.72	TRUE	not applicable	unknown	cc-by	not applicable	hybrid	TRUE	Wellcome Trust			87622
PMC4702711	26511739	10.1128/jcm.02227-15	American Society for Microbiology	Journal of clinical microbiology	0095-1137, 1098-660X	Microscopic-observation Drug-susceptibility (mods) For Rapid Diagnosis Of Lymph Node Tuberculosis And Detection Of Drug Resistance	2442.49	TRUE	not applicable	unknown	cc-by	not applicable	hybrid	TRUE	Wellcome Trust			100693	OPP1118545	MR/K007467/1
PMC5021395	27440884	10.1128/jvi.00819-16	American Society for Microbiology	Journal of virology	0022-538X, 1098-5514	Nonhuman TRIM5 variants enhance recognition of HIV-1-infected cells by CD8+ T cells	1686.68	TRUE	not applicable	unknown	cc-by	not applicable	hybrid	TRUE	Wellcome Trust
PMC4810621	26739048	10.1128/jvi.02614-15	American Society for Microbiology	Journal of virology	0022-538X, 1098-5514	Leukocyte Immunoglobulin-Like Receptor 1-Expressing Human Natural Killer Cell Subsets Differentially Recognize Isolates of Human Cytomegalovirus through the Viral Major Histocompatibility Complex Class I Homolog UL18.	1731.47	TRUE	not applicable	unknown	cc-by	not applicable	hybrid	TRUE	Wellcome Trust	MRC	0	WT094107AIA	G0701279	HS-14-11
PMC4645334	26401037	10.1128/jvi.03664-14	American Society for Microbiology	Journal of virology	0022-538X, 1098-5514	Antiviral RNA Interference against Orsay Virus Is neither Systemic nor Transgenerational in Caenorhabditis elegans.	1767.13	TRUE	not applicable	unknown	cc-by	not applicable	hybrid	TRUE	Wellcome Trust	Cancer Research UK	0	unknown	104640	92096
PMC4645642	26339045	10.1128/jvi.01873-15	American Society for Microbiology	Journal of virology	0022-538X, 1098-5514	Epstein-Barr viruses deficient in EBER RNAs give higher LMP2 RNA expression in lymphoblastoid cell lines and efficiently establish persistent infection in humanized mice.	1793.66	TRUE	not applicable	unknown	cc-by	not applicable	hybrid	TRUE				R01 AI067968	T32-CA90111	R01-AI067968
PMC4621119	26311877	10.1128/jvi.01950-15	American Society for Microbiology	Journal of virology	0022-538X, 1098-5514	Remote activation of host cell DNA synthesis in uninfected cells signalled by infected cells in advance of virus transmission.	1855.03	TRUE	not applicable	unknown	cc-by	not applicable	hybrid	TRUE	Wellcome Trust	MRC		093643/Z/10/Z	MR/L000148/1
PMC4859703	26937032	10.1128/jvi.03174-15	American Society for Microbiology	Journal of virology	0022-538X, 1098-5514	The RNA Helicase eIF4A Is Required for Sapovirus Translation.	1872.66	TRUE	not applicable	FALSE	cc-by	not applicable	hybrid	TRUE	Wellcome Trust	0	0	BB/J001708/1	BB/I012303/1
PMC4810533	26865725	10.1128/jvi.02449-15	American Society for Microbiology	Journal of virology	0022-538X, 1098-5514	Porcine Sapelovirus Uses Î±2,3-Linked Sialic Acid on GD1a Ganglioside as a Receptor.	1891.26	TRUE	not applicable	unknown	cc-by	not applicable	hybrid	TRUE	Wellcome Trust	0	0	097997/Z/11/Z			R33 AI102187	NIAID NIH HHS
PMC4984645	27226379	10.1128/jvi.00826-16	American Society for Microbiology	Journal of virology	0022-538X, 1098-5514	Release of Infectious Hepatitis C Virus from Huh7 Cells Occurs via a trans-Golgi Network-to-Endosome Pathway Independent of Very-Low-Density Lipoprotein Secretion	1907.28	TRUE	not applicable	unknown	cc-by	not applicable	hybrid	TRUE	Wellcome Trust	0	0
PMC4810542	26842472	10.1128/jvi.02858-15	American Society for Microbiology	Journal of virology	0022-538X, 1098-5514	Genetic Stability of BAC-Derived Human Cytomegalovirus During Culture In Vitro	1972.1	TRUE	not applicable	unknown	cc-by	not applicable	hybrid	TRUE	Wellcome Trust	MRC	0	WT090323	G0801822	HS-14-11
PMC4580203	26269176	10.1128/jvi.01102-15	American Society for Microbiology	Journal of virology	0022-538X, 1098-5514	Structures of Coxsackievirus A16 Capsids with Native Antigenicity: Implications for Particle Expansion, Receptor Binding, and Immunogenicity	2082.03	TRUE	not applicable	unknown	cc-by	not applicable	hybrid	TRUE	Wellcome Trust			90532	075491/Z/04	G1000099
PMC5008107	27384665	10.1128/jvi.01075-16	American Society for Microbiology	Journal of virology	0022-538X, 1098-5514	Structure-activity relationships of the Human Immunodeficiency Virus Type 1 maturation inhibitor PF-46396	2239	TRUE	not applicable	unknown	cc-by	not applicable	hybrid	TRUE	Wellcome Trust	0	0
PMC4702540	26446602	10.1128/jvi.02247-15	American Society for Microbiology	Journal of virology	0022-538X, 1098-5514	Oligomerization requirements for MX2 mediated suppression of HIV-1 infection	1516.55	TRUE	not applicable	FALSE	cc-by-nc-sa	cc-by-nc-sa	hybrid	FALSE	Wellcome Trust			unknown	106223	G1000196
PMC4958240	27406559	10.1128/mbio.00474-16	American Society for Microbiology	mBio	2150-7511	Salmonella Effectors SseF and SseG Interact with Mammalian Protein ACBD3 (GCP60) To Anchor Salmonella-Containing Vacuoles at the Golgi Network	1346.51	TRUE	not applicable	unknown	cc-by	not applicable	oa	TRUE
PMC4807372	27006459	10.1128/mbio.02162-15	American Society for Microbiology	mBio	2150-7511	Evolutionary history of the global emergence of the Escherichia coli epidemic clone ST 131	1556.23	TRUE	not applicable	unknown	cc-by	not applicable	oa	TRUE	Wellcome Trust			101237	099423/Z/12/Z	I01 CX000192
PMC5040112	27677790	10.1128/mbio.01053-16	American Society for Microbiology	mBio	2150-7511	Recombination in Streptococcus pneumoniae lineages increase with carriage duration and size of the polysaccharide capsule	2739.74	TRUE	not applicable	unknown	cc-by	not applicable	oa	TRUE	Wellcome Trust
PMC4807356	27025248	10.1128/mbio.00029-16	American Society for Microbiology	mBio	2150-7511	Human Cytomegalovirus Infection Upregulates the Mitochondrial Transcription and Translation Machineries.	1900.74	TRUE	not applicable	FALSE	cc-by	not applicable	oa	TRUE	Wellcome Trust	0	0	108070/Z/15/Z	MR/L008734/1	MC_U105697135
PMC4916385	27329754	10.1128/mbio.00819-16	American Society for Microbiology	mBio	2150-7511	The Redundancy of Peptidoglycan Carboxypeptidases Ensures Robust Cell Shape Maintenance in Escherichia coli	2077.94	TRUE	not applicable	unknown	cc-by	not applicable	oa	TRUE	Wellcome Trust			R01 GM061019	BB/J015016/1
PMC4959517	27073088	10.1128/mbio.00020-16	American Society for Microbiology	mBio	2150-7511	Cytosolic Replication of Group A Streptococcus in Human Macrophages	2457.5	TRUE	not applicable	unknown	cc-by	not applicable	oa	TRUE	Wellcome Trust			unknown	MR/K027077/1	unknown
PMC4937209	27353752	10.1128/mbio.00525-16	American Society for Microbiology	mBio	2150-7511	Genomic analysis and comparison of two gonorrhoea outbreaks	2473.38	TRUE	not applicable	unknown	cc-by	not applicable	oa	TRUE				MR/K010174/1	MR/N010760/1	MR/K010174/1B
PMC4628070	26391951	10.1128/mcb.00432-15	American Society for Microbiology	Molecular and cellular biology	0270-7306, 1098-5549	Independent mechanisms target SMCHD1 to H3K9me3-modified chromatin and the inactive X chromosome	1789.48	TRUE	not applicable	unknown	cc-by	not applicable	hybrid	TRUE	Wellcome Trust			81385	093305/Z/10/Z	103768
PMC4625583	26354544	10.3945/ajcn.114.100529	American Society for Nutrition	The American journal of clinical nutrition	0002-9165, 1938-3207	Effects on childhood body habitus of feeding large volumes of cow or formula milk compared to breastfeeding in the latter part of infancy	3896.12	TRUE	not applicable	unknown	cc-by	not applicable	hybrid	TRUE	Wellcome Trust	MRC		102215	92731	MC_PC_15018
PMC4588736	26354545	10.3945/ajcn.114.095117	American Society for Nutrition	The American journal of clinical nutrition	0002-9165, 1938-3207	WHO guidelines for a healthy diet and mortality from cardiovascular disease in European and American elderly: the CHANCES project	3935.77	TRUE	not applicable	unknown	cc-by	not applicable	hybrid	TRUE	Wellcome Trust			G0601463	1R01 AG23522
PMC4658462	26561631	10.3945/ajcn.115.116095	American Society for Nutrition	The American journal of clinical nutrition	0002-9165, 1938-3207	The association of coffee intake with liver cancer risk is mediated by biomarkers of inflammation and hepatocellular injury: data from the European Prospective Investigation into Cancer and Nutrition.	4039.32	TRUE	not applicable	unknown	cc-by	not applicable	hybrid	TRUE	Cancer Research UK	British Heart Foundation	0	14136	16491	G1000143
PMC4658459	26511225	10.3945/ajcn.115.111989	American Society for Nutrition	The American journal of clinical nutrition	0002-9165, 1938-3207	Metabolic profiles of male meat-eaters, fish eaters, vegetarians and vegans from the EPIC-Oxford cohort	4104.38	TRUE	not applicable	unknown	cc-by	not applicable	hybrid	TRUE	Cancer Research UK	Cancer Research UK		16491	19170	MR/M012190/1
PMC4880999	27169835	10.3945/ajcn.115.128132	American Society for Nutrition	The American journal of clinical nutrition	0002-9165, 1938-3207	Does neighborhood fast-food outlet exposure amplify inequalities in diet and obesity? A cross-sectional study.	4157.42	TRUE	not applicable	FALSE	cc-by	not applicable	hybrid	TRUE	British Heart Foundation	Cancer Research UK	ESRC	ES/G007462/1	MC_UU_12015/5	MC_UU_12015/1
PMC4807699	26961927	10.3945/ajcn.115.118216	American Society for Nutrition	The American journal of clinical nutrition	0002-9165, 1938-3207	Best (But Oft-Forgotten) Practices: The Design, Analysis and Interpretation of Mendelian Randomization Studies	4166.66	TRUE	not applicable	unknown	cc-by	not applicable	hybrid	TRUE	MRC	Cancer Research UK		19169	MC_UU_12013/2	MC_UU_12013/1
PMC4733260	26718412	10.3945/ajcn.115.119834	American Society for Nutrition	The American journal of clinical nutrition	0002-9165, 1938-3207	Coenzyme Q10 prevents hepatic fibrosis, inflammation, and oxidative stress in a male rat model of poor maternal nutrition and accelerated postnatal growth.	4231.79	TRUE	not applicable	unknown	cc-by	not applicable	hybrid	TRUE	Wellcome Trust	British Heart Foundation	0	unknown	AMS-SGCL11-AikenC	FS/09/029/27902
PMC4691671	26675767	10.3945/ajcn.115.117382	American Society for Nutrition	The American journal of clinical nutrition	0002-9165, 1938-3207	Appetitive traits and food intake patterns in early life	4237.59	TRUE	not applicable	unknown	cc-by	not applicable	hybrid	TRUE	Cancer Research UK	MRC		14133	unknown	unknown
PMC4807704	26864359	10.3945/ajcn.115.122945	American Society for Nutrition	The American journal of clinical nutrition	0002-9165, 1938-3207	Common genetic architecture underlying young children's food fussiness and liking for vegetables and fruits	4246.61	TRUE	not applicable	unknown	cc-by	not applicable	hybrid	TRUE	Cancer Research UK			14133
PMC4516769	26136589	10.3945/jn.115.211250	American Society for Nutrition	The Journal of nutrition	0022-3166, 1541-6100	Food Price Spikes Are Associated with Increased Malnutrition among Children in Andhra Pradesh, India	3312.97	TRUE	not applicable	unknown	cc-by	not applicable	hybrid	TRUE	Wellcome Trust			1007/09/Z/12/Z	100709	84674
PMC4926845	27306894	10.3945/jn.115.220137	American Society for Nutrition	The Journal of nutrition	0022-3166, 1541-6100	Dietary diversity is positively associated with deviation from the expected height in rural Nepal	3744.84	TRUE	not applicable	unknown	cc-by	not applicable	hybrid	TRUE	Wellcome Trust
PMC4807647	26962182	10.3945/jn.115.224659	American Society for Nutrition	The Journal of nutrition	0022-3166, 1541-6100	Free Sugars and Total Fat Are Important Characteristics of a Dietary Pattern Associated with Adiposity across Childhood and Adolescence	4265.88	TRUE	not applicable	unknown	cc-by	not applicable	hybrid	TRUE	MRC	Wellcome Trust		102215	MC_PC_15018
PMC4815360	26956245	10.1124/pr.115.011833	American Society for Pharmacology & Experimental Therapeutics (ASPET)	Pharmacological reviews	0031-6997, 1521-0081	Endothelin.	2428.91	TRUE	not applicable	unknown	cc-by	not applicable	hybrid	TRUE	Wellcome Trust	British Heart Foundation	0	WT107715/Z/15/Z	099156/Z/12/Z	096822/Z/11/Z
	26669427	10.1124/jpet.115.230011	American Society for Pharmacology & Experimental Therapeutics (ASPET)	The Journal of pharmacology and experimental therapeutics	0022-3565, 1521-0103	Noncompetitive Inhibition of 5-HT3 Receptors by Citral, Linalool, and Eucalyptol Revealed by Nonlinear Mixed-Effects Modeling.	2462.73	FALSE	FALSE	not applicable	unknown	cc-by	hybrid	FALSE	british-heart-foundation,	0	0	PG/13/39/30293
PMC5098845	26644535	10.1200/jco.2015.63.8221	American Society of Clinical Oncology (ASCO)	Journal of clinical oncology : official journal of the American Society of Clinical Oncology	0732-183X, 1527-7755	Randomized Double-Blind Trial of Pregabalin Versus Placebo in Conjunction With Palliative Radiotherapy for Cancer-Induced Bone Pain	3499.74	TRUE	not applicable	unknown	cc-by	not applicable	hybrid	TRUE	Cancer Research UK			A11922	MCCC-FCO-11-C	G0800803
unknown	27432915	10.1200/jco.2015.66.0001	American Society of Clinical Oncology (ASCO)	Journal of clinical oncology : official journal of the American Society of Clinical Oncology	0732-183X, 1527-7755	Gain of 1q as a prognostic biomarker in Wilms tumours treated with pre-operative chemotherapy in the SIOP WT 2001 trial: A SIOP Renal Tumours Biology Consortium Study	3107.79	FALSE	FALSE	not applicable	unknown	unknown	hybrid	FALSE	Cancer Research UK			W1090	V1405
PMC4598192	25795918	10.1182/blood-2014-11-611905	American Society of Hematology	Blood	0006-4971, 1528-0020	Targeted downregulation of platelet CLEC-2 occurs through Syk-independent internalization	1337.08	TRUE	not applicable	FALSE	unknown	unknown	hybrid	FALSE	British Heart Foundation	Wellcome Trust	0
4884102	26490391	10.1681/asn.2015010100	American Society of Nephrology (ASN)	Journal of the American Society of Nephrology : JASN	1046-6673, 1533-3450	A De Novo Deletion in the Regulators of Complement Activation Cluster Producing a Hybrid Complement Factor H/Complement Factor HÂ–Related 3 Gene in Atypical Hemolytic Uremic Syndrome	2478.82	FALSE	FALSE	not applicable	unknown	non-standard-licence	hybrid	FALSE	Wellcome Trust			G0701325
PMC4674243	26503278	10.4269/ajtmh.14-0767	American Society of Tropical Medicine and Hygiene	The American journal of tropical medicine and hygiene	0002-9637, 1476-1645	Modelling Combinations of Pre-erythrocytic Plasmodium falciparum Malaria Vaccines	1656.93	TRUE	not applicable	unknown	cc-by	not applicable	hybrid	TRUE	Wellcome Trust
PMC4674260	26458775	10.4269/ajtmh.15-0383	American Society of Tropical Medicine and Hygiene	The American journal of tropical medicine and hygiene	0002-9637, 1476-1645	Sero epidemiological study of inter epidemic Rift Valley Fever	1978.5	TRUE	not applicable	unknown	cc-by	not applicable	hybrid	TRUE	Wellcome Trust			U51 IP000327	P01 AG000001
PMC5280061	27367606	10.1044/2015_jslhr-s-14-0282	American Speech Language Hearing Association	Journal of speech, language, and hearing research : JSLHR	1092-4388, 1558-9102	Prevalence and predictors of persistent speech sound disorder at 8-years-old: Findings from a population cohort study	2078.58	TRUE	FALSE	FALSE	cc-by	cc-by	hybrid	TRUE	MRC	Wellcome Trust		MC_PC_15018	102215
PMC4849871	27092718	10.1167/iovs.16-19067	Association for Research in Vision and Ophthalmology (ARVO)	Investigative ophthalmology & visual science	0146-0404, 1552-5783	Retinal Nerve Fiber Layer Measures and Cognitive Function in the EPIC-Norfolk Cohort Study.	1336.76	TRUE	not applicable	FALSE	cc-by	not applicable	hybrid	TRUE	Wellcome Trust	Cancer Research UK	0	unknown	C864/A14136	G1000143
PMC4855826	27124316	10.1167/iovs.16-19332	Association for Research in Vision and Ophthalmology (ARVO)	Investigative ophthalmology & visual science	0146-0404, 1552-5783	A Genome-Wide Association Study Provides New Evidence ThatÂ CACNA1CGene is Associated With Diabetic Cataract	1302.9	TRUE	not applicable	FALSE	cc-by-nc-nd	cc-by-nc-nd	hybrid	FALSE	Wellcome Trust			unknown
PMC5024667	27604067	10.1167/16.11.4	Association for Research in Vision and Ophthalmology (ARVO)	Journal of vision	1534-7362	A signature of neural coding at human perceptual limits	1705.82	TRUE	not applicable	unknown	cc-by	not applicable	oa	TRUE	wellcome-trust,
PMC4993241	26894512	10.1167/16.3.28	Association for Research in Vision and Ophthalmology (ARVO)	Journal of vision	1534-7362	A solid frame for the window on cognition: Modeling event-related pupil responses	1682.7	TRUE	not applicable	TRUE	non-standard-licence	cc-by	oa	FALSE	Wellcome Trust			91593	091593/Z/10/Z
PMC5015923	27617181	10.1167/tvst.5.4.15	Association for Research in Vision and Ophthalmology (ARVO)	Translational vision science & technology	2164-2591	Feasibility, Accuracy, and Repeatability of Suprathreshold Saccadic Vector Optokinetic Perimetry	1451.98	TRUE	not applicable	unknown	cc-by	not applicable	hybrid	TRUE	Wellcome Trust
PMC5155399	27964754	NOTYETPUBLISHED	BioMed Central	Breast cancer research : BCR	1465-5411, 1465-542X	Imaging the mammary gland and mammary tumours in 3D: optical tissue clearing and immunofluorescence methods	1957.2	TRUE	not applicable	unknown	cc-by	not applicable	oa	TRUE	Cancer Research UK	Wellcome Trust
PMC5002965	26864459	10.1530/ec-16-0004	BioScientifica	Endocrine connections	2049-3614	Mild cold effects on hunger, food intake, satiety and skin temperature in humans.	1020	TRUE	not applicable	unknown	cc-by	not applicable	oa	TRUE	British Heart Foundation	MRC	0		MC_UU_12012/2
PMC4697192	26574572	10.1530/erc-15-0386	BioScientifica	Endocrine-related cancer	1351-0088, 1479-6821	CYP19A1 fine-mapping and Mendelian randomization: estradiol is causal for endometrial cancer.	1620	TRUE	not applicable	FALSE	cc-by	cc-by	hybrid	TRUE	Cancer Research UK	Wellcome Trust	Multiple Others		90532
PMC5065077	27257145	10.1530/eje-16-0461	BioScientifica	European journal of endocrinology	0804-4643, 1479-683X	MANAGEMENT OF ENDOCRINE DISEASE: Imaging for the diagnosis of malignancy in incidentally discovered adrenal masses - a systematic review and meta-analysis	1620	TRUE	not applicable	unknown	cc-by	not applicable	hybrid	TRUE	Wellcome Trust	EU	0
PMC4761956	26586839	10.1530/eje-15-0866	BioScientifica	European journal of endocrinology	0804-4643, 1479-683X	Maternal hypothyroxinaemia in pregnancy is associated with obesity and adverse maternal metabolic parameters.	3240	TRUE	not applicable	unknown	cc-by	not applicable	hybrid	TRUE	Wellcome Trust	0	0	98395	NF-SI-0611-10219
PMC4982111	26183892	10.1530/rep-15-0258	BioScientifica	Reproduction (Cambridge, England)	1470-1626, 1741-7899	Specific inhibition of c-Jun N-terminal kinase delays preterm labour and reduces mortality	3300	TRUE	not applicable	unknown	cc-by	not applicable	hybrid	TRUE	Wellcome Trust			DSRR-P24225
PMC5064764	27535945	10.1530/joe-16-0258	BioScientifica	The Journal of endocrinology	0022-0795, 1479-6805	Rapid phenotyping of knockout mice to identify genetic determinants of bone strength	1620	TRUE	not applicable	unknown	cc-by	not applicable	hybrid	TRUE
PMC5264217	27117700	10.1136/annrheumdis-2015-208456	BMJ	Annals of the rheumatic diseases	0003-4967, 1468-2060	Autologous tolerogenic dendritic cells for rheumatoid and inflammatory arthritis	2340	TRUE	FALSE	FALSE	cc-by	cc-by	hybrid	TRUE	Arthritis Research
PMC5264213	27245864	10.1136/annrheumdis-2015-208849	BMJ	Annals of the rheumatic diseases	0003-4967, 1468-2060	High frequency of antidrug antibodies and association of random drug levels with efficacy in certolizumab pegol-treated patients with rheumatoid arthritis: results from the BRAGGSS cohort.	1170	TRUE	FALSE	FALSE	cc-by	cc-by	hybrid	TRUE
PMC5264234	27165180	10.1136/annrheumdis-2015-208886	BMJ	Annals of the rheumatic diseases	0003-4967, 1468-2060	Transient receptor potential canonical 5 (TRPC5) protects against pain and vascular inflammation in arthritis and joint inflammation	1756.25	TRUE	FALSE	FALSE	cc-by	cc-by	hybrid	TRUE	Arthritis Research UK
PMC5099200	26698846	10.1136/annrheumdis-2015-208268	BMJ	Annals of the rheumatic diseases	0003-4967, 1468-2060	Proteinase-activated receptor 2 modulates OA-related pain, cartilage and bone pathology	1657.5	TRUE	not applicable	unknown	cc-by	not applicable	hybrid	TRUE	Arthritis Research UK (ARUK)			20199
PMC5099197	26882927	10.1136/annrheumdis-2015-208387	BMJ	Annals of the rheumatic diseases	0003-4967, 1468-2060	Examination of overall treatment effect and the proportion attributable to contectual effect in osteoarthritis: Meta-analysis of randomised controlled trials	1989	TRUE	not applicable	unknown	cc-by	not applicable	hybrid	TRUE	Arthritis Research UK	Other	0
PMC5036240	26659717	10.1136/annrheumdis-2015-208356	BMJ	Annals of the rheumatic diseases	0003-4967, 1468-2060	Single cell cloning and recombinant monoclonal antibodies generation from RA synovial B cells reveal frequent targeting of citrullinated histones of NETs.	1657.5	TRUE	not applicable	unknown	cc-by	not applicable	hybrid	TRUE
PMC5036245	26659718	10.1136/annrheumdis-2015-208495	BMJ	Annals of the rheumatic diseases	0003-4967, 1468-2060	Identification of an immunodominant peptide from citrullinated tenascin-C as a major target for autoantibodies in rheumatoid arthritis	2293.2	TRUE	not applicable	unknown	cc-by	not applicable	hybrid	TRUE	Arthritis Research UK			20003
PMC5136719	26916345	10.1136/annrheumdis-2015-208640	BMJ	Annals of the rheumatic diseases	0003-4967, 1468-2060	An ankylosing spondylitis-associated genetic variant in the <i>IL23R-IL12RB2</I> intergenic region modulates enhancer activity and is associated with increased Th1-cell differentiation	2342.89	TRUE	not applicable	unknown	cc-by	not applicable	hybrid	TRUE	Arthritis Research UK			20402	281824	20796
unknown	27489225	10.1136/annrheumdis-2016-209428	BMJ	Annals of the rheumatic diseases	0003-4967, 1468-2060	The intervertebral disc contains intrinsic circadian clocks that are regulated by age and cytokines and linked to degeneration.	1170	FALSE	TRUE	not applicable	unknown	cc-by	hybrid	FALSE
PMC5256401	27831912	10.1136/archdischild-2016-311419	BMJ	Archives of disease in childhood	0003-9888, 1468-2044	Challenges in reducing group B Streptococcus disease in African settings.	2340	TRUE	FALSE	FALSE	cc-by	cc-by	hybrid	TRUE	Wellcome Trust
PMC5256404	27496911	10.1136/archdischild-2015-309381	BMJ	Archives of disease in childhood	0003-9888, 1468-2044	Recent developments in the detection and management of acute kidney injury.	2340	TRUE	FALSE	FALSE	cc-by	cc-by	hybrid	TRUE
PMC4853609	26553907	10.1136/archdischild-2014-307217	BMJ	Archives of disease in childhood	0003-9888, 1468-2044	Management of Crohn's disease	1657.5	TRUE	not applicable	unknown	cc-by	not applicable	hybrid	TRUE	MRC			G0800675
PMC4752649	26515228	10.1136/archdischild-2014-307908	BMJ	Archives of disease in childhood	0003-9888, 1468-2044	Thermoregulatory effects of swaddling in Mongolia: A randomised controlled study	1989	TRUE	not applicable	unknown	cc-by	not applicable	hybrid	TRUE	Wellcome Trust	0	0
PMC4789707	26718815	10.1136/archdischild-2015-309754	BMJ	Archives of disease in childhood	0003-9888, 1468-2044	Coeliac screening in a Scottish cohort of children with Type 1 Diabetes Mellitus Â– is DQ-typing the way forward?	1989	TRUE	not applicable	unknown	cc-by	not applicable	hybrid	TRUE	Wellcome Trust			98522
PMC4862069	26948824	10.1136/archdischild-2015-309212	BMJ	Archives of disease in childhood	0003-9888, 1468-2044	Evidence for a delay in diagnosis of WilmsÂ’ tumour in the UK compared to Germany: implications for primary care for children	1989	TRUE	not applicable	unknown	cc-by	not applicable	hybrid	TRUE	Cancer Research UK
PMC5013085	27117837	10.1136/archdischild-2015-310347	BMJ	Archives of disease in childhood	0003-9888, 1468-2044	Back to school: Challenges and rewards of engaging young children in scientific research	1989	TRUE	not applicable	unknown	cc-by	not applicable	hybrid	TRUE	Wellcome Trust
PMC4975805	26857824	10.1136/archdischild-2014-306746	BMJ	Archives of disease in childhood	0003-9888, 1468-2044	Child poverty in the UK: Using evidence for action	2340	TRUE	not applicable	unknown	cc-by	not applicable	hybrid	TRUE	Wellcome Trust	MRC			G0802448
PMC4975808	27162002	10.1136/archdischild-2015-309465	BMJ	Archives of disease in childhood	0003-9888, 1468-2044	Exploring the impact of early life factors on inequalities in risk of overweight in UK children: Findings from the UK Millennium Cohort Study	2340	TRUE	not applicable	unknown	cc-by	not applicable	hybrid	TRUE	Wellcome Trust	MRC			MR/J012351/1
unknown	27831910	10.1136/archdischild-2016-311248	BMJ	Archives of disease in childhood	0003-9888, 1468-2044	Using reporting guidelines to publish paediatric research.	1755	FALSE	TRUE	not applicable	unknown	unknown	hybrid	FALSE	Wellcome Trust
PMC4975809	27059283	10.1136/archdischild-2016-310459	BMJ	Archives of disease in childhood. Education and practice edition	1743-0585, 1743-0593	What is CRISPR/cas9	2340	TRUE	not applicable	unknown	cc-by	not applicable	hybrid	TRUE	Wellcome Trust
unknown	unknown	10.1136/svn-2016-000035	BMJ	BMJ	2059-8688	Update on cerebral small vessel disease: a dynamic whole-brain disease	1275	FALSE	TRUE	not applicable	unknown	cc-by	hybrid	FALSE	Wellcome Trust
unknown	27370543	10.1136/bmj.i3319	BMJ	BMJ (Clinical Research Ed)	0959-8138, 1756-1833	Patient focused registries can improve health, care, and science	3600	FALSE	FALSE	not applicable	unknown	unknown	hybrid	FALSE	wellcome-trust, A. Tosteson, PI), Robert Wood Johnson Foundation (Grants: #71211 and 72313), Work Life and Welfare (#2014-4238)., and the CrohnÃ¢Â€Â™s and Colitis Foundation of America Quality of Care Initiative (Grant #3372). TSM was funded by the Multidisciplinary Clinical Research Center for Musculoskeletal Diseases at Dartmouth (P60 AR-062799, sponsored by the National Institute for Arthritis…	0	0
PMC4925917	27353418	10.1136/bmj.i3283	BMJ	BMJ (Clinical research ed.)	0959-8138, 1756-1833	Impact of statin related media coverage on use of statins: interrupted time series analysis with UK primary care data.	2700	TRUE	not applicable	unknown	cc-by	not applicable	hybrid	TRUE	Wellcome Trust
PMC4575810	26387520	10.1136/bmj.h4708	BMJ	BMJ (Clinical research ed.)	0959-8138, 1756-1833	Discrepancies in clinical trial reports: frequency in retracted reports versus unretracted reports	2700	TRUE	not applicable	unknown	cc-by	not applicable	hybrid	TRUE	Department of Health	British Heart Foundation		924	FS/10/038	FS/14/27/30752
PMC4875244	27207165	10.1136/bmj.i2587	BMJ	BMJ (Clinical research ed.)	0959-8138, 1756-1833	Regulatory approval of new medical devices: a cross sectional study	2700	TRUE	not applicable	unknown	cc-by	not applicable	hybrid	TRUE
PMC5008696	27586237	10.1136/bmj.i4351	BMJ	BMJ (Clinical research ed.)	0959-8138, 1756-1833	Population-based long-term cause-specific mortality among 34,489 5-year survivors of childhood cancer in Great Britain	3060	TRUE	not applicable	unknown	cc-by	not applicable	hybrid	TRUE	Cancer Research UK	0	0
PMC4647185	26578347	10.1136/bmj.h5948	BMJ	BMJ (Clinical research ed.)	0959-8138, 1756-1833	Antenatal blood pressure for prediction of pre-eclampsia, preterm birth, and small for gestational age babies: development and validation in two general population cohorts	3060	TRUE	not applicable	unknown	cc-by	not applicable	hybrid	TRUE	Wellcome Trust	Wellcome Trust	MRC	102215	WT087997MA	701594
PMC4783516	26956984	10.1136/bmj.i582	BMJ	BMJ (Clinical research ed.)	0959-8138, 1756-1833	Height, BMI and socioeconomic status: Mendelian randomisation study in the UK Biobank	3600	TRUE	not applicable	unknown	cc-by	not applicable	hybrid	TRUE	Wellcome Trust	MRC	European Union	WT097835MF	104150/Z/14/Z	323195
PMC4870382	27188404	10.1136/bmj.i2403	BMJ	BMJ (Clinical research ed.)	0959-8138, 1756-1833	Deaths, late deaths and the role of infectingdose in Ebola: a cohort study	3600	TRUE	not applicable	unknown	cc-by	not applicable	hybrid	TRUE	Wellcome Trust
PMC4452930	26037950	10.1136/bmj.h2388	BMJ	BMJ (Clinical research ed.)	0959-8138, 1756-1833	Verenicline and risk of psychiatric conditions, suicidal behaviour, criminal offending, and transport accidents and offences: population based cohort study	3600	TRUE	not applicable	unknown	cc-by	not applicable	hybrid	TRUE	Wellcome Trust			95806
PMC4868367	27185754	10.1136/bmj.i2648	BMJ	BMJ (Clinical research ed.)	0959-8138, 1756-1833	Biases in detection of apparent weekend effect on outcome with administrative coding data: population based study of stroke	3600	TRUE	not applicable	unknown	cc-by	not applicable	hybrid	TRUE	Wellcome Trust	Dunhill Medical Trust		95626	OSRP2/1006
	26508518	10.1136/bmj.h5085	BMJ	BMJ (Clinical research ed.)	0959-8138, 1756-1833	Liberalising agricultural policy for sugar in Europe risks damaging public health.	3600	FALSE	FALSE	not applicable	unknown	cc-by	hybrid	FALSE	british-heart-foundation, cancer-research-uk, esrc, mrc, nihr, wellcome-trust,	0	0	unknown	ES/G007462/1	MC_UU_12015/6
PMC5013477	27566630	10.1136/bmjopen-2016-011300	BMJ	BMJ open	2044-6055	Inclusion of persons with disabilities in systems of social protection:a population-based survey and case-control study in Peru.	0	TRUE	not applicable	unknown	cc-by	not applicable	oa	TRUE	Wellcome Trust
PMC4932306	27297009	10.1136/bmjopen-2015-010508	BMJ	BMJ open	2044-6055	Latest trends in ADHD drug prescibing patterns in children in the UK: Prevalence, incidence and persistence.	0	TRUE	not applicable	unknown	cc-by	not applicable	oa	TRUE	Wellcome Trust
PMC5030546	27633634	10.1136/bmjopen-2016-011677	BMJ	BMJ open	2044-6055	Prognostic variables and scores identifying the last year of life in COPD: a systematic review protocol	900	TRUE	not applicable	unknown	cc-by	not applicable	oa	TRUE
PMC4025454	24793252	10.1136/bmjopen-2013-004633	BMJ	BMJ open	2044-6055	Text messaging reminders for influenza vaccine in primary care: a cluster randomised controlled trial. (TXT4FLUJAB)	1012.5	TRUE	not applicable	unknown	cc-by	not applicable	oa	TRUE	Wellcome Trust			098504/Z/12/Z.	98504	NF-SI-0510-10090
PMC4611206	26482768	10.1136/bmjopen-2015-007925	BMJ	BMJ open	2044-6055	Decision-analytic cost-effectiveness model to compare prostate cryotherapy to androgen deprivation therapy for treatment of radiation recurrent prostate cancer	1147.5	TRUE	not applicable	unknown	cc-by	not applicable	oa	TRUE	Cancer Research UK (CAN-RES-UK)			C1381/A12441
PMC4679899	26646829	10.1136/bmjopen-2015-009799	BMJ	BMJ open	2044-6055	Protocol of the adaptive study of IL-2 dose frequency on regulatory T cells in type 1 diabetes (DILfrequency): a mechanistic, non-randomised, repeat dose, open-label, response-adaptive study.	1200	TRUE	not applicable	unknown	cc-by	not applicable	oa	TRUE	Wellcome Trust	0	0	100140	91157	NF-SI-0508-10275
PMC5020752	27601493	10.1136/bmjopen-2016-011661	BMJ	BMJ open	2044-6055	Sodium channel-inhibiting drugs and cancer survival: protocol for a cohort study using the CPRD primary care database	1200	TRUE	not applicable	unknown	cc-by	not applicable	oa	TRUE	MRC	Wellcome Trust	0	G1000508
PMC4735219	26792218	10.1136/bmjopen-2015-009849	BMJ	BMJ open	2044-6055	Protocol for the CONVERT trial-Concurrent ONce-daily VErsus twice-daily RadioTherapy: an international 2-arm randomised controlled trial of concurrent chemoradiotherapy comparing twice-daily and once-daily radiotherapy schedules in patients with limited stage small cell lung cancer (LS-SCLC) and good performance status.	1200	TRUE	not applicable	unknown	cc-by	not applicable	oa	TRUE	Cancer Research UK			C17052/A8154	20465
PMC4885467	27235304	10.1136/bmjopen-2016-012209	BMJ	BMJ open	2044-6055	Non-specific Mechanisms in Orthodox and CAM management of low back pain (MOCAM). Theoretical Framework and Protocol for a Prospective Cohort Study	1212.5	TRUE	not applicable	unknown	cc-by	not applicable	oa	TRUE	Arthritis Research UK	0	0	20552
PMC4785319	26932143	10.1136/bmjopen-2015-010355	BMJ	BMJ open	2044-6055	Managing the screen-viewing behaviours of 5-6 year old children: a qualitative analysis of parental strategies	1215	TRUE	not applicable	unknown	cc-by	not applicable	oa	TRUE	British Heart Foundation			SP/14/4/31123	PG/11/51/28986
PMC4932306	27297009	10.1136/bmjopen-2015-010508	BMJ	BMJ open	2044-6055	Latest trends in ADHD drug prescibing patterns in children in the UK: Prevalence, incidence and persistence.	1215	TRUE	not applicable	unknown	cc-by	not applicable	oa	TRUE	Wellcome Trust
PMC5020862	27591023	10.1136/bmjopen-2016-012102	BMJ	BMJ open	2044-6055	Optimising case-detection within UK electronic health records: utilisation of multiple linked database for detecting liver injury.	1215	TRUE	not applicable	unknown	cc-by	not applicable	oa	TRUE	Wellcome Trust	MRC			G0802403
PMC4932264	27354069	10.1136/bmjopen-2015-010393	BMJ	BMJ open	2044-6055	What evidence is there for a delay in diagnostic coding of rheumatoid arthritis in UK general practice records? An observational study of free text	1215	TRUE	not applicable	unknown	cc-by	not applicable	oa	TRUE	Wellcome Trust
PMC5030539	27633633	10.1136/bmjopen-2016-011075	BMJ	BMJ open	2044-6055	Current and Future Perspectives on Lumbar Degenerative Disc Disease: a UK survey exploring specialist multidisciplinary clinical opinion.	1215	TRUE	not applicable	unknown	cc-by	not applicable	oa	TRUE
PMC4735315	26769786	10.1136/bmjopen-2015-009812	BMJ	BMJ open	2044-6055	Outcomes After Kidney injury in Surgery (OAKS): Protocol for a multi-centre, observational cohort study of acute kidney injury following major surgery	1377	TRUE	not applicable	unknown	cc-by	not applicable	oa	TRUE	Wellcome Trust	0	0	unknown
PMC4710813	26719320	10.1136/bmjopen-2015-009635	BMJ	BMJ open	2044-6055	Balance ability in 7- and 10-year-old children: associations with prenatal lead and cadmium exposure and with blood lead levels in children in a prospective birth cohort study	1377	TRUE	not applicable	unknown	cc-by	not applicable	oa	TRUE	Wellcome Trust			104077/Z/14/Z	102215/2/13/2	102215
PMC4823443	27053273	10.1136/bmjopen-2015-010622	BMJ	BMJ open	2044-6055	NAP SACC UK: protocol for a feasibility cluster randomised controlled trial in nurseries and at home to increase physical activity and healthy eating in 2-4 year olds	1377	TRUE	not applicable	unknown	cc-by	not applicable	oa	TRUE	MRC	Wellcome Trust	ESRC	MC_UU_12017/14	unknown	unknown
PMC4853970	27130167	10.1136/bmjopen-2016-011063	BMJ	BMJ open	2044-6055	Validating the use of Hospital Episode Statistics data and comparison of costing methodologies for economic evaluation: an end of life case study from the Cluster randomised triAl of PSA testing for Prostate cancer (CAP)	1377	TRUE	not applicable	unknown	cc-by	not applicable	oa	TRUE	MRC	Cancer Research UK		C11043/A4286	C18281/A11326	unknown
PMC4885280	27230998	10.1136/bmjopen-2015-010129	BMJ	BMJ open	2044-6055	Increasing compliance with low tidal volume ventilation in the ICU with two nudge-based interventions: evaluation through intervention time-series analyses	1377	TRUE	not applicable	unknown	cc-by	not applicable	oa	TRUE	EPSRC	Wellcome Trust		EP/I032622/1
PMC5073629	27707829	10.1136/bmjopen-2016-012447	BMJ	BMJ open	2044-6055	Gamification for health promotion: systematic review of behaviour change techniques in smartphone apps	1377	TRUE	not applicable	unknown	cc-by	not applicable	oa	TRUE	ESRC	MRC	British Heart Foundation		MC_UU_12013/6
PMC5073590	27742626	10.1136/bmjopen-2016-012425	BMJ	BMJ open	2044-6055	Are prenatal mercury levels associated with subsequent blood pressure in childhood and adolescence? The Avon prebirth cohort study	1377	TRUE	not applicable	unknown	cc-by	not applicable	oa	TRUE	MRC	Wellcome Trust
PMC4710823	26715480	10.1136/bmjopen-2015-009476	BMJ	BMJ open	2044-6055	The Burden of Poor Oral Health in Older Age: Findings from a Population-based Study of Older British Men	1377	TRUE	not applicable	unknown	cc-by	not applicable	oa	TRUE	MRC	MRC	British Heart Foundation	G0501859	G1002391	RG/13/16/30528
PMC4735307	26810999	10.1136/bmjopen-2015-010132	BMJ	BMJ open	2044-6055	ATTIRE: Albumin To prevenT Infection in chronic liveR failurE: study protocol for a single arm feasibility trial	1377	TRUE	not applicable	unknown	cc-by	not applicable	oa	TRUE	Wellcome Trust	Department of Health		164699	unknown
PMC4809090	27009148	10.1136/bmjopen-2015-010521	BMJ	BMJ open	2044-6055	Are depression and poor sexual health neglected co-morbidities? Evidence from a population sample	1377	TRUE	not applicable	unknown	cc-by	not applicable	oa	TRUE	Wellcome Trust	MRC		84840	G0701757
PMC4838699	27053274	10.1136/bmjopen-2015-010723	BMJ	BMJ open	2044-6055	Survey of public definitions of the term Â‘overdiagnosisÂ’ in the United Kingdom	1377	TRUE	not applicable	unknown	cc-by	not applicable	oa	TRUE	Cancer Research UK			C1418/A14134	14134
PMC4838720	27067891	10.1136/bmjopen-2015-010366	BMJ	BMJ open	2044-6055	Objectively measured physical activity and sedentary time: cross-sectional and prospective associations with adiposity in the Millennium Cohort Study	1377	TRUE	not applicable	unknown	cc-by	not applicable	oa	TRUE	Wellcome Trust			084686/Z/08/A	G0400546
PMC5051389	27683512	10.1136/bmjopen-2016-011511	BMJ	BMJ open	2044-6055	Online self-assessment of cardiovascular risk using the Joint British Societies (JBS3)-derived heart age tool: a descriptive study	1377	TRUE	not applicable	unknown	cc-by	not applicable	oa	TRUE	British Heart Foundation			FS/14/76/30933
PMC4593156	26419679	10.1136/bmjopen-2015-007609	BMJ	BMJ open	2044-6055	Assessing risk factors for early hip osteoarthritis in activity-related hip pain: a Delphi study	1587.6	TRUE	not applicable	unknown	cc-by	not applicable	oa	TRUE	Arthritis Research UK			20 194
PMC4809094	27006343	10.1136/bmjopen-2015-010354	BMJ	BMJ open	2044-6055	Â‘Why should I worry, since I have healthy feet?Â’ A qualitative study exploring barriers to use of footwear among rural community members in Northern Ethiopia.	1612.07	TRUE	not applicable	unknown	cc-by	not applicable	oa	TRUE	Wellcome Trust			91956	99876
PMC4716170	26747030	10.1136/bmjopen-2015-008881	BMJ	BMJ open	2044-6055	Vaginal birth after caesarean section: why is uptake so low? Insights from a meta-ethnographic synthesis of women's accounts of their birth choices.	1620	TRUE	not applicable	unknown	cc-by	not applicable	oa	TRUE	Wellcome			unknown
PMC4716169	26739725	10.1136/bmjopen-2015-008931	BMJ	BMJ open	2044-6055	Patient-centred care, health behaviours and cardiovascular risk factor levels in people with recently diagnosed type 2 diabetes: 5-year follow-up of the ADDITION-Plus trial cohort.	1620	TRUE	not applicable	unknown	cc-by	not applicable	oa	TRUE	Wellcome Trust	MRC	Department of Health		G0001164	RP-PG-0606-1259
PMC4716154	26743707	10.1136/bmjopen-2015-009973	BMJ	BMJ open	2044-6055	'Keeping your body and mind active': an ethnographic study of aspirations for healthy ageing.	1620	TRUE	not applicable	unknown	cc-by	not applicable	oa	TRUE	Wellcome	ESRC	MRC	unknown	ES/G007462/1	MC_U106179474
PMC4735298	26792216	10.1136/bmjopen-2015-009461	BMJ	BMJ open	2044-6055	Predicting admissions and time spent in hospital over a decade in a population-based record linkage study: the EPIC-Norfolk cohort.	1620	TRUE	not applicable	unknown	cc-by	not applicable	oa	TRUE	Cancer Research UK	0	0	14136	C864/A2883	C864/A8257
PMC4735146	26801459	10.1136/bmjopen-2015-007690	BMJ	BMJ open	2044-6055	Social, demographic and healthcare factors associated with stage at diagnosis of cervical cancer: cross-sectional study in a tertiary hospital in Northern Uganda.	1620	TRUE	not applicable	unknown	cc-by	not applicable	oa	TRUE	Wellcome Trust		Cancer Research UK	100891	87540	18180
PMC4885436	27217288	10.1136/bmjopen-2016-011577	BMJ	BMJ open	2044-6055	Reasons for non-participation in a primary care-based physical activity trial: a qualitative study.	1620	TRUE	not applicable	FALSE	cc-by	not applicable	oa	TRUE	British Heart Foundation	Cancer Research UK	Wellcome Trust	RP-PG-0608-10079
PMC5129050	27836873	10.1136/bmjopen-2016-012335	BMJ	BMJ open	2044-6055	Feasibility study and pilot cluster randomised controlled trial of the GoActive Intervention aiming to promote physical activity among adolescents: outcomes and lessons learnt	1620	TRUE	not applicable	unknown	cc-by	not applicable	oa	TRUE	MRC	British Heart Foundation	Cancer Research UK	MC_UU_12015/7
PMC4636673	26503396	10.1136/bmjopen-2015-009625	BMJ	BMJ open	2044-6055	The relative importance of perceived doctor's attiude on the decision to consult for symptomatic osteoarthritis: a choice-based conjoint analysis study	1620	TRUE	not applicable	unknown	cc-by	not applicable	oa	TRUE	MRC	Arthritis Research UK		G0501798	18175
PMC4769413	26908513	10.1136/bmjopen-2015-009070	BMJ	BMJ open	2044-6055	The incidence of adult Huntingdon's diseases in the UK: a UK-based primary card study and a systematic review	1620	TRUE	not applicable	unknown	cc-by	not applicable	oa	TRUE	Wellcome Trust	MRC		unknown	G0802403	MR/K006584/1
PMC4985909	27496230	10.1136/bmjopen-2015-011000	BMJ	BMJ open	2044-6055	Hypertensive disorders of pregnancy and risk of diabetes in Indian women: A cross-sectional study.	1620	TRUE	not applicable	unknown	cc-by	not applicable	oa	TRUE	Wellcome Trust			84674
PMC5051403	27670520	10.1136/bmjopen-2016-012308	BMJ	BMJ open	2044-6055	Burden assessment of Podoconiosis in Wayu Tuka Woreda, East Wollega Zone, Western Ethiopia: A community based cross-sectional study	1620	TRUE	not applicable	unknown	cc-by	not applicable	oa	TRUE	Wellcome Trust			99876
PMC4654280	26576806	10.1136/bmjopen-2015-007808	BMJ	BMJ open	2044-6055	Observational, longitudinal study of delirium in consecutive unselected acute medical admissions: age-specific rates and associated factors, mortality and re-admission	1620	TRUE	not applicable	unknown	cc-by	not applicable	oa	TRUE	Wellcome Trust			104040	unknown	95626
PMC4893864	27256090	10.1136/bmjopen-2015-010975	BMJ	BMJ open	2044-6055	Risk factors for dermatitis in submariners during a submerged patrol: an observational cohort study	1620	TRUE	not applicable	unknown	cc-by	not applicable	oa	TRUE	Wellcome Trust
PMC4885443	27225649	10.1136/bmjopen-2015-010712	BMJ	BMJ open	2044-6055	Development of a brief assessment and algorithm for ascertaining dementia in low and middle income countries: the 10/66 short dementia diagnostic schedule	1621.25	TRUE	not applicable	unknown	cc-by	not applicable	oa	TRUE	Wellcome Trust
PMC4985971	27491666	10.1136/bmjopen-2015-010988	BMJ	BMJ open	2044-6055	Ethnographic process evaluation of a quality improvement project to improve transitions of care for older people.	1625	TRUE	not applicable	FALSE	cc-by	not applicable	oa	TRUE	Wellcome Trust	0	0	97899
PMC4985971	27491666	10.1136/bmjopen-2015-010988	BMJ	BMJ open	2044-6055	Ethnographic process evaluation of a quality improvement project to improve transitions of care for older people.	1625	TRUE	not applicable	FALSE	cc-by	not applicable	oa	TRUE	Wellcome Trust	0	0	97899
PMC4746473	26846898	10.1136/bmjopen-2015-010374	BMJ	BMJ open	2044-6055	Surgical trainee research collaboratives in the UK: an observational study of research activity and publication productivity	1652.4	TRUE	not applicable	unknown	cc-by	not applicable	oa	TRUE	Wellcome Trust			R43608	12/35/57	NIHR-RP-R3-12-013
PMC4947744	27406646	10.1136/bmjopen-2016-011600	BMJ	BMJ open	2044-6055	Geographic variation in the treatment of non-ST-segment myocardial infarction in the English National Health Service: a cohort study	1833.28	TRUE	not applicable	unknown	cc-by	not applicable	oa	TRUE	British Heart Foundation	0	0
PMC4663409	26614625	10.1136/bmjopen-2015-009576	BMJ	BMJ open	2044-6055	Multiple myeloma and physical activity: a scoping review	1377	TRUE	not applicable	FALSE	cc-by-nc	cc-by	oa	FALSE	Cancer Research UK			C1418/A141	14133
PMC4762086	26918193	10.1136/bmjresp-2015-000114	BMJ	BMJ open respiratory research	2052-4439	ERK and AKT phosphorylation status in lung cancer and emphysema using nanocapillary isoelectric focusing.	2040	TRUE	not applicable	unknown	cc-by	not applicable	oa	TRUE	Department of Health	Cancer Research UK		NIHR-CS-012-009	20465
PMC5136708	27683348	10.1136/bjsports-2016-096142	BMJ	British journal of sports medicine	0306-3674, 1473-0480	Does sports participation (including level of performance and previous injury) increase risk of osteoarthritis? A systematic review and meta-analysis	2340	TRUE	not applicable	unknown	cc-by	not applicable	hybrid	TRUE	Arthritis Research UK	0	0
PMC5284485	26887815	10.1136/gutjnl-2015-309395	BMJ	Gut	0017-5749, 1468-3288	STAT4-associated natural killer cell tolerance following liver transplantation	2340	TRUE	FALSE	FALSE	cc-by	cc-by	hybrid	TRUE	Wellcome Trust
PMC4893117	26701877	10.1136/gutjnl-2015-310748	BMJ	Gut	0017-5749, 1468-3288	Evolution of oesophageal adenocarcinoma from metaplastic columnar epithelium without goblet cells in Barrett's oesophagus.	1657.5	TRUE	not applicable	unknown	cc-by	not applicable	hybrid	TRUE
PMC4853574	26719299	10.1136/gutjnl-2015-310861	BMJ	Gut	0017-5749, 1468-3288	Proton pump inhibitors alter the composition of the gut microbiota.	2057.5	TRUE	not applicable	unknown	cc-by	not applicable	hybrid	TRUE	Wellcome Trust			unknown	DP2 OD007444	KL2 TR000081
PMC4853561	26729296	10.1136/gutjnl-2015-311133	BMJ	Gut	0017-5749, 1468-3288	The gamma-glutamyl transpeptidase to platelet ratio (GPR) shows poor correlation with transient elastohraphy measurements of liver fibrosis in HIV-positive patients with chronic hepatitis	2340	TRUE	not applicable	unknown	cc-by	not applicable	hybrid	TRUE	MRC	Department of Health	Wellcome Trust	MR/J01477X/1	2247
	26858343	10.1136/gutjnl-2015-310344	BMJ	Gut	0017-5749, 1468-3288	Reversal of murine alcoholic steatohepatitis by pepducin-based functional blockade of interleukin-8 receptors.	2340	FALSE	TRUE	not applicable	unknown	cc-by	hybrid	FALSE	wellcome-trust,	0	0
unknown	27618837	10.1136/gutjnl-2016-312278	BMJ	Gut	0017-5749, 1468-3288	Wnt signalling modulates transcribed-ultraconserved regions in hepato-biliary cancers	2640	FALSE	TRUE	not applicable	unknown	cc-by	hybrid	FALSE	Cancer Research UK
unknown	26953272	10.1136/gutjnl-2015-310382	BMJ	Gut	0017-5749, 1468-3288	Impaired anti-bacterial autophagy links granulomatous intestinal inflammation in Niemann-Pick disease type C1 and XIAP deficiency with NOD2 variants in Crohn's disease	2640	FALSE	TRUE	not applicable	unknown	cc-by	hybrid	FALSE	Wellcome Trust			P30 DK043351	AMS-SGCL9-Booth
PMC5099221	27465053	10.1136/heartjnl-2015-309223	BMJ	Heart (British Cardiac Society)	1355-6037, 1468-201X	Phosphodiesterase type-5 inhibitor use in type 2 diabetes is associated with a reduction in all-cause mortality.	2340	TRUE	not applicable	FALSE	cc-by	cc-by	hybrid	TRUE
PMC4752612	26674986	10.1136/heartjnl-2015-308428	BMJ	Heart (British Cardiac Society)	1355-6037, 1468-201X	Ambulatory heart rate range predicts mode-specific mortality and hospitalisation in chronic heart failure	1989	TRUE	not applicable	unknown	cc-by	not applicable	hybrid	TRUE	British Heart Foundation	0	0	FS/12/51/29584	FS/12/80/29821	PG/08/020/24617
PMC4853639	26857212	10.1136/heartjnl-2015-308939	BMJ	Heart (British Cardiac Society)	1355-6037, 1468-201X	Performance of 2014 NICE defibrillator implantation guidelines in heart failure risk stratification	1989	TRUE	not applicable	unknown	cc-by	not applicable	hybrid	TRUE	British Heart Foundation	0	0	FS/11/94/29180	FS/14/10/30472	FS/12/80/29821
PMC4752647	26732182	10.1136/heartjnl-2015-308616	BMJ	Heart (British Cardiac Society)	1355-6037, 1468-201X	Patient and hospital determinants of primary percutaneous coronary intervention in England, 2003Â–2013	1989	TRUE	not applicable	unknown	cc-by	not applicable	hybrid	TRUE	British Heart Foundation	0	0	SRF-2013-06-015	MR/K006584/1
PMC4789695	26674987	10.1136/heartjnl-2015-307855	BMJ	Heart (British Cardiac Society)	1355-6037, 1468-201X	Reducing myocardial infarct size: Challenges and future opportunities	1989	TRUE	not applicable	unknown	cc-by	not applicable	hybrid	TRUE	British Heart Foundation			NF-SI-0510-10164	FS/10/039/28270
PMC4789702	26786818	10.1136/heartjnl-2015-308514	BMJ	Heart (British Cardiac Society)	1355-6037, 1468-201X	Associations between polymyalgia rheumatica and giant cell arteritis and twelve cardiovascular diseases	1989	TRUE	not applicable	unknown	cc-by	not applicable	hybrid	TRUE	Wellcome Trust	MRC		WT 086091/Z/08/Z	098504/Z/12/Z	MR/K006584/1
PMC4819627	26857214	10.1136/heartjnl-2014-306962	BMJ	Heart (British Cardiac Society)	1355-6037, 1468-201X	Contrast induced nephropathy following angiography and cardiac interventions	1989	TRUE	not applicable	unknown	cc-by	not applicable	hybrid	TRUE	British Heart Foundation			FS/10/039/28270
PMC4849559	26864674	10.1136/heartjnl-2015-308850	BMJ	Heart (British Cardiac Society)	1355-6037, 1468-201X	Using electronic health records to predict costs and outcomes in stable coronary artery disease	1989	TRUE	not applicable	unknown	cc-by	not applicable	hybrid	TRUE	Wellcome Trust	MRC/ESRC/EPSRC		93830	DRF-2012-05-409	NF-SI-0512-10159
PMC4941181	27126394	10.1136/heartjnl-2015-308993	BMJ	Heart (British Cardiac Society)	1355-6037, 1468-201X	Sexual activity and concerns in people with coronary heart disease from a population-based study	1989	TRUE	not applicable	unknown	cc-by	not applicable	hybrid	TRUE	British Heart Foundation			RG/10/005/28296	R01 AG017644
PMC4941166	27126396	10.1136/heartjnl-2015-308845	BMJ	Heart (British Cardiac Society)	1355-6037, 1468-201X	Cardiovascular risk stratification in familial hypercholesterolemia	1989	TRUE	not applicable	unknown	cc-by	not applicable	hybrid	TRUE	British Heart Foundation
PMC4717410	26512019	10.1136/heartjnl-2015-308044	BMJ	Heart (British Cardiac Society)	1355-6037, 1468-201X	Computational fluid dynamics modelling in cardiovascular medicine	2340	TRUE	not applicable	unknown	cc-by	not applicable	hybrid	TRUE	EPSRC	British Heart Foundation	Department of Health	1245857	RG/13/1/30042	RC-PG-0309-10063
PMC5099207	27411841	10.1136/heartjnl-2016-309661	BMJ	Heart (British Cardiac Society)	1355-6037, 1468-201X	An unusual finding in a 57-year-old woman with new onset hypertension and a diastolic murmur.	2345	TRUE	not applicable	FALSE	cc-by	not applicable	hybrid	TRUE	British Heart Foundation	NIHR	Wellcome Trust
PMC4686802	26752801	10.1136/inp.h5547	BMJ	In practice	0263-841X, 2042-7689	Diagnosing limb paresis and paralysis in sheep	1989	TRUE	not applicable	unknown	cc-by	not applicable	hybrid	TRUE	Wellcome Trust
PMC5136723	27189958	10.1136/jclinpath-2016-203641	BMJ	Journal of clinical pathology	0021-9746, 1472-4146	Helicobacter pylori vacAÂ transcription is genetically-determined and stratifies the level of human gastric inflammation and atrophy	1657.5	TRUE	not applicable	unknown	cc-by	not applicable	hybrid	TRUE	Cancer Research UK	Other	0
PMC4975840	27153873	10.1136/jclinpath-2015-203351	BMJ	Journal of clinical pathology	0021-9746, 1472-4146	T cell abnormalities in Common Variable Immunodeficiency (CVID)	1989	TRUE	not applicable	unknown	cc-by	not applicable	hybrid	TRUE	Wellcome Trust	0	0
PMC5284463	27965315	10.1136/jech-2015-206257	BMJ	Journal of epidemiology and community health	0143-005X, 1470-2738	Public pensions and unmet medical need among older people: cross-national analysis of 16 European countries, 2004-2010	2340	TRUE	FALSE	FALSE	cc-by	cc-by	hybrid	TRUE	Wellcome Trust
PMC4941186	26739272	10.1136/jech-2015-205855	BMJ	Journal of epidemiology and community health	0143-005X, 1470-2738	Formative evaluation of a participatory women's group intervention to improve reproductive and women's health outcomes in rural Bangladesh: a controlled before and after study	1989	TRUE	not applicable	unknown	cc-by	not applicable	hybrid	TRUE	Wellcome Trust
PMC4893142	26677257	10.1136/jech-2015-206455	BMJ	Journal of epidemiology and community health	0143-005X, 1470-2738	The physical activity profiles of South Asian ethnic groups in England	2340	TRUE	not applicable	unknown	cc-by	not applicable	hybrid	TRUE	British Heart Foundation
unknown	27531844	10.1136/jech-2016-207366	BMJ	Journal of epidemiology and community health	0143-005X, 1470-2738	Ethnicity-specific factors influencing childhood immunisation decisions among Black and Asian Minority ethnic groups in the UK: A systematic review of qualitative research	1989	FALSE	TRUE	not applicable	unknown	cc-by	hybrid	FALSE	Cancer Research UK			17219	14134
PMC5099315	27451425	10.1136/medethics-2015-103014	BMJ	Journal of medical ethics	0306-6800, 1473-4257	Should non-disclosures be considered as morally equivalent to lies within the doctor-patient relationship?	2238.21	TRUE	not applicable	unknown	cc-by	not applicable	hybrid	TRUE	Wellcome Trust	0	0
PMC4789809	26744307	10.1136/medethics-2015-102781	BMJ	Journal of medical ethics	0306-6800, 1473-4257	Â“Is this knowledge mine and nobody elseÂ’s? I donÂ’t feel that.Â” Patient views about consent, confidentiality & information-sharing in genetic medicine.	2352.5	TRUE	not applicable	unknown	cc-by	not applicable	hybrid	TRUE	Wellcome Trust	0	0	WT088581MF
unknown	27582080	10.1136/medethics-2015-103045	BMJ	Journal of medical ethics	0306-6800, 1473-4257	Can Â‘Best InterestsÂ’ derail the trolley? Examining withdrawal of Clinically Assisted Nutrition and Hydration in patients in the Permanent Vegetative State	2238.21	FALSE	TRUE	not applicable	unknown	cc-by	hybrid	FALSE	Wellcome Trust	0	0
unknown	27733437	10.1136/medethics-2016-103795	BMJ	Journal of medical ethics	0306-6800, 1473-4257	Rationing conscience	2293.2	FALSE	TRUE	not applicable	unknown	cc-by	hybrid	FALSE	Wellcome Trust			106587
PMC4819619	26831755	10.1136/jmedgenet-2015-103342	BMJ	Journal of medical genetics	0022-2593, 1468-6244	A study of common Mendelian disease carriers across ageing British cohorts: meta-analyses reveal heterozygosity for alpha 1-antitrypsin deficiency increases respiratory capacity and height	1989	TRUE	not applicable	unknown	cc-by	not applicable	hybrid	TRUE	MRC	Wellcome Trust		102215	ref:102215/2/13/2	1, MC_UU_12019/4
PMC4862068	26993267	10.1136/jmedgenet-2015-103263	BMJ	Journal of medical genetics	0022-2593, 1468-6244	Improving diagnosis and broadening the phenotypes in early onset seizure and severe developmental delay disorders through gene panel analysis	1989	TRUE	not applicable	unknown	cc-by	not applicable	hybrid	TRUE	Wellcome Trust	MRC
PMC4853543	26769062	10.1136/jmedgenet-2015-103233	BMJ	Journal of medical genetics	0022-2593, 1468-6244	A Specific Mutation in TBL1XR1 Causes Pierpont Syndrome	2340	TRUE	not applicable	unknown	cc-by	not applicable	hybrid	TRUE	Wellcome Trust			85408	100237
PMC4215269	25228304	10.1136/jmedgenet-2014-102582	BMJ	Journal of medical genetics	0022-2593, 1468-6244	De novo and rare inherited mutations implicate the transcriptional coregulator TCF20/SPBP in autism spectrum disorder	2340	TRUE	not applicable	unknown	cc-by	not applicable	hybrid	TRUE	Wellcome Trust			93329	090532/Z/09/Z	78666
PMC5013090	27091925	10.1136/jmedgenet-2015-103576	BMJ	Journal of medical genetics	0022-2593, 1468-6244	A recurrent mitochondrial p.Trp22Arg NDUFB3 variant causes a distinctive facial appearance, short stature and a mild biochemical and clinical phenotype	2640	TRUE	not applicable	unknown	cc-by	not applicable	hybrid	TRUE	Wellcome Trust			G0601943
unknown	27412952	10.1136/jmedgenet-2016-103910	BMJ	Journal of medical genetics	0022-2593, 1468-6244	The clinical, biochemical and genetic features associated with RMND1-related mitochondrial disease	2340	FALSE	TRUE	not applicable	unknown	cc-by	hybrid	FALSE	Wellcome Trust
unknown	unknown	10.1136/jnnp-2016-313918	BMJ	Journal of Neurology, Neurosurgery & Psychiatry	0022-3050	Cerebral glucose metabolism and cognition in newly diagnosed Parkinson's disease: ICICLE-PD study	2808	FALSE	TRUE	not applicable	unknown	cc-by	hybrid	FALSE	Parkinsons UK
PMC5256147	26487646	10.1136/jnnp-2015-311947	BMJ	Journal of neurology, neurosurgery, and psychiatry	0022-3050, 1468-330X	Recent time trends in incidence, outcome and premorbid treatment of atrial fibrillation-related stroke and other embolic vascular events: a population-based study.	2640	TRUE	FALSE	FALSE	cc-by	cc-by	hybrid	TRUE	Wellcome Trust
PMC5013120	26733599	10.1136/jnnp-2015-312782	BMJ	Journal of neurology, neurosurgery, and psychiatry	0022-3050, 1468-330X	A novel use of Arterial Spin Labelling MRI to demonstrate focal hypoperfusion in individuals with posterior cortical atrophy: a multi-modal imaging study	1989	TRUE	not applicable	unknown	cc-by	not applicable	hybrid	TRUE	Wellcome Trust			91673	108	NF-SI-0513-10134
PMC4975823	26848171	10.1136/jnnp-2015-311890	BMJ	Journal of neurology, neurosurgery, and psychiatry	0022-3050, 1468-330X	The pre-diagnostic phase of Parkinson's Disease	1989	TRUE	not applicable	unknown	cc-by	not applicable	hybrid	TRUE	Parkinsons UK
PMC5136717	27451352	10.1136/jnnp-2015-312738	BMJ	Journal of neurology, neurosurgery, and psychiatry	0022-3050, 1468-330X	The contribution of lesion location to upper limb deficit after stroke	1989	TRUE	not applicable	unknown	cc-by	not applicable	hybrid	TRUE	Wellcome Trust
PMC5136720	27530809	10.1136/jnnp-2016-313518	BMJ	Journal of neurology, neurosurgery, and psychiatry	0022-3050, 1468-330X	Adaptive deep brain stimulation for Parkinson's demonstrates reduced speech side effects compared to conventional stimulation in the acute setting	1989	TRUE	not applicable	unknown	cc-by	not applicable	hybrid	TRUE	Wellcome Trust
	27821537	10.1136/medhum-2016-011054	BMJ	Medical humanities	1468-215X, 1473-4265	There was no great ceremony: patient narratives and the diagnostic encounter in the context of Parkinson's	2340	FALSE	TRUE	not applicable	unknown	cc-by	hybrid	FALSE	Wellcome Trust
PMC4853597	26715106	10.1136/oemed-2015-103074	BMJ	Occupational and environmental medicine	1351-0711, 1470-7926	Plural mesothelioma and lung cancer risks in relation to occupational history and asbestos lung burden.	1755	TRUE	not applicable	unknown	cc-by	not applicable	hybrid	TRUE	Cancer Research UK			MC_UU_12023/21	unknown	MR/K006584/1
PMC4800759	27042321	10.1136/openhrt-2015-000343	BMJ	Open heart	2053-3624	The Distribution Of Lifespan Gain From Primary Prevention Intervention	1530	TRUE	not applicable	unknown	cc-by	not applicable	oa	TRUE	British H			FS/12/12/29294	K23 HL121144	FS/14/27/30752
PMC4809186	27042318	10.1136/openhrt-2015-000338	BMJ	Open heart	2053-3624	Long-term Survival After Surgical Aortic Valve Replacement Amongst Patients Over 65 Years Of Age	1530	TRUE	not applicable	unknown	cc-by	not applicable	oa	TRUE
PMC5051497	27752330	10.1136/openhrt-2016-000443	BMJ	Open heart	2053-3624	Radial Artery Vasomotor Function Following Transradial Cardiac Catheterisation	1734	TRUE	not applicable	unknown	cc-by	not applicable	oa	TRUE	British Heart Foundation			PG/13/32/30205
PMC4716452	26835141	10.1136/openhrt-2015-000322	BMJ	Open heart	2053-3624	A propensity matched comparison of return to work and quality of life after stenting or coronary artery bypass surgery	1734	TRUE	not applicable	unknown	cc-by	not applicable	oa	TRUE	British Heart Foundation
PMC4716454	26835140	10.1136/openhrt-2015-000313	BMJ	Open heart	2053-3624	A time-series study of Percutaneous Closure of Patent Foramen Ovale-premature adoption?	2040	TRUE	not applicable	unknown	cc-by	not applicable	oa	TRUE	British Heart Foundation
PMC4860848	27175286	10.1136/openhrt-2015-000337	BMJ	Open heart	2053-3624	Ventricular Longitudinal Function is Associated with Microvascular Obstruction and Intramyocardial Haemorrhage	2040	TRUE	not applicable	unknown	cc-by	not applicable	oa	TRUE	British Heart Foundation	0	0
PMC4746523	26870390	10.1136/openhrt-2015-000369	BMJ	Open heart	2053-3624	Does the timing of cardiac rehabilitation impact fitness outcomes?	2040	TRUE	not applicable	unknown	cc-by	not applicable	oa	TRUE	British Heart Foundation	0	0
PMC4879341	27239324	10.1136/openhrt-2016-000402	BMJ	Open heart	2053-3624	Effects of the small molecule SIRT1 activator, SRT2104 on arterial stiffness in otherwise healthy cigarette smokers and subjects with type 2 diabetes mellitus	1734	TRUE	not applicable	unknown	cc-by-nc	cc-by	oa	FALSE	Wellcome Trust
PMC4680180	26386028	10.1136/practneurol-2015-001206	BMJ	Practical neurology	1474-7758, 1474-7766	How to write a successful grant or fellowship application	2340	TRUE	not applicable	unknown	cc-by	not applicable	hybrid	TRUE	Wellcome Trust			98282
PMC4879345	27252891	10.1136/rmdopen-2015-000183	BMJ	RMD open	2056-5933	Leucocyte subset-specific type 1 interferon signatures in SLE and other immune-mediated diseases.	1224	TRUE	not applicable	FALSE	cc-by	not applicable	oa	TRUE	Wellcome Trust	0	0
unknown	unknown	10.1136/rmdopen-2016-000273	BMJ	RMD Open	2056-5933	Effectiveness and safety of TNF inhibitors in adults with juvenile idiopathic arthritis	2040	FALSE	TRUE	not applicable	unknown	cc-by	oa	FALSE
PMC4893086	26888658	10.1136/sextrans-2015-052439	BMJ	Sexually transmitted infections	1368-4973, 1472-3263	Mass drug administration of azithromycin for trachoma reduces the prevalence of genital Chlamydia trachomatis infection in the Solomon Islands.	1755	TRUE	not applicable	unknown	cc-by	not applicable	hybrid	TRUE	Wellcome Trust			102807
PMC5013104	27272533	10.1136/sextrans-2015-052459	BMJ	Sexually transmitted infections	1368-4973, 1472-3263	Forming new sex partnerships while overseas: findings from the third British National Survey of Sexual Attitudes & Lifestyles (Natsal-3)	1989	TRUE	not applicable	unknown	cc-by	not applicable	hybrid	TRUE	Wellcome Trust	MRC		MC_UU_12017/11	G0701757
PMC5013102	26965869	10.1136/sextrans-2015-052389	BMJ	Sexually transmitted infections	1368-4973, 1472-3263	Men who have sex with men in Britain: comparison of estimates from a probability sample and community-based surveys	1989	TRUE	not applicable	unknown	cc-by	not applicable	hybrid	TRUE	Wellcome Trust	MRC		MC_UU_12017/2	MC_UU_12017/11
unknown	27535765	10.1136/sextrans-2016-052646	BMJ	Sexually transmitted infections	1368-4973, 1472-3263	How can we objectively categorise partnership type? A novel classification of population survey data to inform epidemiological research and clinical practice	1989	FALSE	TRUE	not applicable	unknown	cc-by	hybrid	FALSE	Wellcome Trust	MRC		MC_UU_12017/11
PMC5136691	26951772	10.1136/bjophthalmol-2015-307798	BMJ	The British journal of ophthalmology	0007-1161, 1468-2079	Randomised controlled trial of video clips and interactive games to improve vision in children with amblyopia using the I-BiT system	1989	TRUE	not applicable	unknown	cc-by	not applicable	hybrid	TRUE	Wellcome Tust	0	0
PMC4033179	24599419	10.1136/bjophthalmol-2013-303948	BMJ	The British journal of ophthalmology	0007-1161, 1468-2079	Rates of referable eye disease in the Scottish National Diabetic Retinopathy Screening Programme	2340	TRUE	not applicable	unknown	cc-by	not applicable	hybrid	TRUE	Wellcome Trust			WT086113
PMC5284336	27573451	10.1136/thoraxjnl-2015-208188	BMJ	Thorax	0040-6376, 1468-3296	Bronchiectasis and the risk of cardiovascular disease: a population based study.	2340	TRUE	FALSE	FALSE	cc-by	cc-by	hybrid	TRUE	Wellcome Trust
PMC5329051	27496101	10.1136/thoraxjnl-2016-208597	BMJ	Thorax	0040-6376, 1468-3296	Evidence for chemokine synergy during neutrophil migration in ARDS	1989	TRUE	FALSE	FALSE	cc-by	cc-by	hybrid	TRUE	Wellcome Trust	MRC
PMC4893123	26811343	10.1136/thoraxjnl-2014-206724	BMJ	Thorax	0040-6376, 1468-3296	Lung function and airway obstruction: associations with circulating markers of cardiac function and incident heart failure in older men: The British Regional Heart Study	1989	TRUE	not applicable	unknown	cc-by	not applicable	hybrid	TRUE	British Heart Foundation			FS/12/62/29889
PMC4819623	26921304	10.1136/thoraxjnl-2015-208107	BMJ	Thorax	0040-6376, 1468-3296	Pulmonary nodules and CT screening: the past, present and future	1989	TRUE	not applicable	unknown	cc-by	not applicable	hybrid	TRUE	Wellcome Trust			unknown	1337958	17976
PMC4941149	26911574	10.1136/thoraxjnl-2015-208063	BMJ	Thorax	0040-6376, 1468-3296	Smokers are less likely than non-smokers to seek help for a lung cancer Â‘alarmÂ’ symptom	1989	TRUE	not applicable	unknown	cc-by	not applicable	hybrid	TRUE	Cancer Research UK			13276
PMC4941152	27071419	10.1136/thoraxjnl-2015-208050	BMJ	Thorax	0040-6376, 1468-3296	Low-pathogenicity Mycoplasma spp. alter human monocyte and macrophage function and are highly prevalent among patients with ventilator-acquired pneumonia	2340	TRUE	not applicable	unknown	cc-by	not applicable	hybrid	TRUE	Wellcome Trust
PMC4717371	26666259	10.1136/thoraxjnl-2015-207360	BMJ	Thorax	0040-6376, 1468-3296	US Cystic Fibrosis Foundation and European Cystic Fibrosis Society consensus recommendations for the management of non-tuberculous mycobacteria in individuals with cystic fibrosis.	2345	TRUE	not applicable	unknown	cc-by	not applicable	hybrid	TRUE	wellcome-trust, NIHR, NIH	0	0	unknown	unknown
PMC5099179	27552782	10.1136/thoraxjnl-2016-208402	BMJ	Thorax	0040-6376, 1468-3296	Incidence and recognition of acute respiratory distress syndrome in a UK intensive care unit.	2345	TRUE	not applicable	FALSE	cc-by	not applicable	hybrid	TRUE	Wellcome Trust	0	0
PMC5099189	27581620	10.1136/thoraxjnl-2015-207604	BMJ	Thorax	0040-6376, 1468-3296	Hypoxia upregulates neutrophil degranulation and potential for tissue injury	2340	TRUE	not applicable	FALSE	cc-by-nc	cc-by-nc	hybrid	FALSE	bbsrc, nihr, wellcome-trust, British Lung Foundation and Papworth Hospital.
PMC5136700	27516225	10.1136/thoraxjnl-2016-208481	BMJ	Thorax	0040-6376, 1468-3296	Multidimensional severity assessment in bronchiectasis - An analysis of 7 European cohorts	2340	TRUE	not applicable	FALSE	cc-by-nc	cc-by-nc	hybrid	FALSE	Wellcome Trust
PMC4853533	26966236	10.1136/thoraxjnl-2016-208318	BMJ	Thorax	0040-6376, 1468-3296	Chimney stove intervention Â– ready for scale up? CON	2340	TRUE	not applicable	FALSE	cc-by-nc	unknown	hybrid	FALSE	Wellcome Trust
unknown	27312824	10.1136/tobaccocontrol-2016-052987	BMJ	Tobacco control	0964-4563, 1468-3318	Support for e-cigarette policies: A survey of smokers and ex-smokers in Great Britain	1760	FALSE	TRUE	not applicable	unknown	cc-by	hybrid	FALSE	Cancer Research UK
unknown	26903596	10.1136/tobaccocontrol-2015-052724	BMJ	Tobacco control	0964-4563, 1468-3318	Impact on smoking of EnglandÂ’s 2012 partial tobacco point of sale display ban: a repeated cross-sectional national study	1989	FALSE	TRUE	not applicable	unknown	cc-by	hybrid	FALSE	Cancer Research UK
PMC5124867	27115318	10.1259/bjr.20150675	British Institute of Radiology	The British journal of radiology	0007-1285, 1748-880X	Vascular assessment of Liver Disease - towards a new frontier in MR imaging	2160	TRUE	not applicable	unknown	cc-by	not applicable	hybrid	TRUE	Wellcome Trust
PMC4986496	26728661	10.1259/bjr.20150770	British Institute of Radiology	The British journal of radiology	0007-1285, 1748-880X	Recalculation of dose for each fraction of treatment on TomoTherapy	2220	TRUE	not applicable	unknown	cc-by	not applicable	hybrid	TRUE	Cancer Research UK			unknown	13405
PMC5124930	27351693	10.1259/bjr.20160342	British Institute of Radiology	The British journal of radiology	0007-1285, 1748-880X	Whole body cardiovascular MRI for the comparison of atherosclerotic burden and cardiac remodelling in healthy South Asian and European adults	2220	TRUE	not applicable	unknown	cc-by	not applicable	hybrid	TRUE	Wellcome Trust
PMC4985208	26585543	10.1259/bjr.20150603	British Institute of Radiology	The British journal of radiology	0007-1285, 1748-880X	A multicentre study of the evidence for customized margins in photon breast boost radiotherapy	2220	TRUE	not applicable	unknown	cc-by	not applicable	hybrid	TRUE	Cancer Research UK			C46/A10588	19727
PMC4986497	26642308	10.1259/bjr.20150775	British Institute of Radiology	The British journal of radiology	0007-1285, 1748-880X	A Diffusion-based Quantification Technique for Assessment of Sacroiliitis in Adolescents with Enthesitis-related Arthritis	2220	TRUE	not applicable	unknown	cc-by	not applicable	hybrid	TRUE	Arthritis Research UK			16463	unknown	20164
PMC5258146	26959610	10.1259/bjr.20150741	British Institute of Radiology	The British journal of radiology	0007-1285, 1748-880X	Reducing the within-patient variability of breathing for radiotherapy delivery in conscious, unsedated cancer patients using a mechanical ventilator	2160	TRUE	FALSE	FALSE	cc-by	unknown	hybrid	TRUE	Wellcome Trust	0	0
PMC5257330	27168468	10.1259/bjr.20160194	British Institute of Radiology	The British journal of radiology	0007-1285, 1748-880X	Safely prolonging single breath-holds to >5 minutes in cancer patients; feasibility and applications for radiotherapy	2220	TRUE	FALSE	FALSE	cc-by	unknown	hybrid	TRUE	Wellcome Trust	0	0
PMC4802978	27057008	10.1017/S0001972013000466	Cambridge University Press (CUP)	Africa : journal of the International Institute of African Languages and Cultures	0001-9720	Environmental akalism and the war on filth: the personification of sanitation in urban Nigeria.	2034	TRUE	not applicable	unknown	cc-by	not applicable	hybrid	TRUE	Wellcome Trust
PMC4855992	26751571	10.1017/s1352465815000430	Cambridge University Press (CUP)	Behavioural and cognitive psychotherapy	1352-4658, 1469-1833	Treating Sleep Problems in Patients with Schizophrenia	2034	TRUE	not applicable	unknown	cc-by	not applicable	hybrid	TRUE	Wellcome Trust			098461/Z/12/Z	PB-PG-0211-10007	G0902308
PMC4721233	26788949	10.1017/s0963180115000316	Cambridge University Press (CUP)	Cambridge quarterly of healthcare ethics : CQ : the international journal of healthcare ethics committees	0963-1801, 1469-2147	Ethical Dilemmas in Post-Natal treatment of Severe Congenital Hydrocephalus	2034	TRUE	not applicable	unknown	cc-by	not applicable	hybrid	TRUE	Wellcome Trust			86041
unknown	27348825	10.1017/s0963180116000050	Cambridge University Press (CUP)	Cambridge quarterly of healthcare ethics : CQ : the international journal of healthcare ethics committees	0963-1801, 1469-2147	The Concept of Dignity and its Use in End-of-life Debates in England and France	2136	FALSE	FALSE	not applicable	unknown	cc-by	hybrid	FALSE	Wellcome Trust
	26804972	10.1017/S2045796016000019	Cambridge University Press (CUP)	Epidemiology and psychiatric sciences	2045-7960, 2045-7979	Coping strategies and mental health outcomes of conflict-affected persons in the Republic of Georgia.	2359.78	FALSE	TRUE	not applicable	unknown	cc-by	hybrid	FALSE	Wellcome Trust
PMC4894061	26976496	10.1017/s1041610216000429	Cambridge University Press (CUP)	International psychogeriatrics	1041-6102, 1741-203X	Regional functional synchronizations in dementia with Lewy bodies and Alzheimer's disease	2034	TRUE	not applicable	FALSE	cc-by-nc-nd	cc-by	hybrid	FALSE	Wellcome Trust			EP/K026992/1
PMC5058406	27628858	10.1017/mdh.2016.56	Cambridge University Press (CUP)	Medical history	0025-7273, 2048-8343	'I am very glad and cheered when I hear the flute': TheÂ Treatment of Criminal Lunatics in Late Victorian Broadmoor.	2136	TRUE	not applicable	unknown	cc-by	not applicable	hybrid	TRUE
PMC4847415	26971594	10.1017/mdh.2016.1	Cambridge University Press (CUP)	Medical history	0025-7273, 2048-8343	Evidence for the continued use of medieval medical prescriptions in the sixteenth century: a fifteenth-century remedy book and its later owner	2136	TRUE	not applicable	unknown	cc-by	not applicable	hybrid	TRUE	Wellcome Trust	0	0	104798/Z/14/Z
PMC5058404	27628860	10.1017/mdh.2016.58	Cambridge University Press (CUP)	Medical history	0025-7273, 2048-8343	Policy Innovation and Policy Pathways: Tuberculosis Control in Sri Lanka, 1948-1990	2136	TRUE	not applicable	unknown	cc-by	not applicable	hybrid	TRUE	Wellcome Trust	0	0
PMC5058405	27628857	10.1017/mdh.2016.97	Cambridge University Press (CUP)	Medical history	0025-7273, 2048-8343	The Internationalisation of Tobacco Control, 1950-2010	2138.5	TRUE	not applicable	unknown	cc-by	not applicable	hybrid	TRUE	Wellcome Trust
PMC4595954	26352306	10.1017/mdh.2015.48	Cambridge University Press (CUP)	Medical history	0025-7273, 2048-8343	The History of Mental Health Services in Modern England: Practitioner Memories and the Direction of Future Research.	2136	TRUE	not applicable	FALSE	non-standard-licence	cc-by	hybrid	FALSE				101454
PMC4877521	26399436	10.1017/s0031182015000815	Cambridge University Press (CUP)	Parasitology	0031-1820, 1469-8161	The role of models in translating within-host dynamics to parasite evolution	2039	TRUE	not applicable	unknown	cc-by	not applicable	hybrid	TRUE	Wellcome Trust			NE/K006029/1	NE/I015329/1
unknown	26935155	10.1017/S0031182016000020	Cambridge University Press (CUP)	Parasitology	0031-1820, 1469-8161	Strongyloides ratti and S. venezuelensis Â– rodent models of Strongyloides infection	2136	FALSE	TRUE	not applicable	unknown	cc-by	hybrid	FALSE	Wellcome Trust
unknown	27759560	10.1017/S0031182016001773	Cambridge University Press (CUP)	Parasitology	0031-1820, 1469-8161	Strongyloides	2136	FALSE	TRUE	not applicable	unknown	cc-by	hybrid	FALSE	Wellcome Trust
unknown	27609027	10.1017/S1463423616000293	Cambridge University Press (CUP)	Primary health care research & development	1463-4236, 1477-1128	Descriptive figures for differences in parenting and infant night-time distress in the first three months of age	2580.7	FALSE	FALSE	not applicable	unknown	cc-by	hybrid	FALSE	Wellcome Trust
PMC4754830	26541510	10.1017/s0033291715002330	Cambridge University Press (CUP)	Psychological medicine	0033-2917, 1469-8978	Divergent subcortical activity for distinct executive functions: stopping and shifting in obsessive compulsive disorder.	2034	TRUE	not applicable	unknown	cc-by	not applicable	hybrid	TRUE	Wellcome Trust	0	0	104631	93875	089589/Z/09/Z
PMC4697304	26492977	10.1017/s0033291715002196	Cambridge University Press (CUP)	Psychological medicine	0033-2917, 1469-8978	Anxiety and anxious depression in Parkinson's disease over a 4 year period: a latent transition analysis	2036.5	TRUE	not applicable	unknown	cc-by	not applicable	hybrid	TRUE	Parkinson's UK			J-0601
PMC4754829	26610039	10.1017/s0033291715002342	Cambridge University Press (CUP)	Psychological medicine	0033-2917, 1469-8978	EFFECT OF HIGH POTENCY CANNABIS ON CORPUS CALLOSUM MICROSTRUCTURE	2039	TRUE	not applicable	unknown	cc-by	not applicable	hybrid	TRUE	Wellcome Trust	NIHR	NARSAD	1097247	608	MR/J002739/1
PMC4886844	26315278	10.1017/s003329171500149x	Cambridge University Press (CUP)	Psychological medicine	0033-2917, 1469-8978	Symptoms of generalized anxiety disorder but not panic disorder at age 15 years increase the risk of depression at 18 years in the Avon Longitudinal Study of Parents and Children (ALSPAC) cohort study	2136	TRUE	not applicable	unknown	cc-by	not applicable	hybrid	TRUE	Wellcome Trust	MRC		92731	102215	084268/Z/07/Z
PMC4988264	27348599	10.1017/s0033291716000532	Cambridge University Press (CUP)	Psychological medicine	0033-2917, 1469-8978	A prospective study of pre-trauma risk factors for post-traumatic stress disorder and depression	2136	TRUE	not applicable	unknown	cc-by	not applicable	hybrid	TRUE	Wellcome Trust
PMC4988267	27353452	10.1017/s0033291716001082	Cambridge University Press (CUP)	Psychological medicine	0033-2917, 1469-8978	Predicting the diagnosis of autism in adults using the Autism-Spectrum Quotient (AQ) questionnaire	2137.67	TRUE	not applicable	unknown	cc-by	not applicable	hybrid	TRUE	Wellcome Trust
PMC4825095	26841896	10.1017/s0033291715002597	Cambridge University Press (CUP)	Psychological medicine	0033-2917, 1469-8978	The specificity of Pavlovian regulation is associated with recovery from depression	2386.47	TRUE	not applicable	unknown	cc-by	not applicable	hybrid	TRUE	Wellcome Trust			98362	098362/Z/12/Z	91593
unknown	27400863	10.1017/s003329171600146x	Cambridge University Press (CUP)	Psychological medicine	0033-2917, 1469-8978	Psychological processes underlying the association between childhood trauma and psychosis in daily life: an experience sampling study	2137	FALSE	FALSE	not applicable	unknown	cc-by	hybrid	FALSE	Wellcome Trust
unknown	27019301	10.1017/s0033291716000441	Cambridge University Press (CUP)	Psychological medicine	0033-2917, 1469-8978	The incidence of psychoses in diverse settings: INTREPID (2): A feasibility study in India, Nigeria, and Trinidad	2384.7	FALSE	FALSE	not applicable	unknown	cc-by	hybrid	FALSE	Wellcome Trust
PMC4825096	26365215	10.1017/s1368980015002578	Cambridge University Press (CUP)	Public health nutrition	1368-9800, 1475-2727	Length of urban residence and obesity among within-country rural-to-urban Andean migrants.	2034	TRUE	not applicable	unknown	cc-by	not applicable	hybrid	TRUE	Wellcome Trust			GR074833MA	98504	2D43-TW007393
PMC5197929	27339189	10.1017/s1368980016001592	Cambridge University Press (CUP)	Public health nutrition	1368-9800, 1475-2727	Childhood dietary patterns and cardiovascular risk factors in adolescence: results from the ALSPAC cohort	2136	TRUE	not applicable	unknown	cc-by	not applicable	hybrid	TRUE	MRC	Wellcome Trust		102215	MC_PC_15018
PMC4873899	26879185	10.1017/s1368980016000185	Cambridge University Press (CUP)	Public health nutrition	1368-9800, 1475-2727	Identifying small groups of foods that can predict achievement of key dietary recommendations: data mining of the UK National Diet and Nutrition Survey, 2008-12.	2440.29	TRUE	not applicable	unknown	cc-by	not applicable	hybrid	TRUE	British Heart Foundation	MRC	0		Medical Research Council
PMC4890343	27146890	10.1017/s0007114516001598	Cambridge University Press (CUP)	The British journal of nutrition	0007-1145, 1475-2662	Dietary patterns in India: a systematic review.	1780	TRUE	not applicable	unknown	cc-by	not applicable	hybrid	TRUE	Wellcome Trust			84674
PMC4839003	27093345	10.1017/s0007114516000957	Cambridge University Press (CUP)	The British journal of nutrition	0007-1145, 1475-2662	Energy and nutrient intakes of young children in the UK: findings from the Gemini twin cohort	1988.25	TRUE	not applicable	FALSE	cc-by-nc-sa	cc-by	hybrid	FALSE	Cancer Research UK	MRC		160897	unknown	161722
	26758859	10.1017/s0007114515005097	Cambridge University Press (CUP)	The British journal of nutrition	0007-1145, 1475-2662	The independent prospective associations of activity intensity and dietary energy density with adiposity in young adolescents.	2136	FALSE	FALSE	not applicable	unknown	cc-by	hybrid	FALSE	british-heart-foundation, cancer-research-uk, esrc, mrc, nihr, wellcome-trust,	0	0	unknown	MC_U105960389	MC_UU_12015/3
unknown	unknown	10.1017/S1754470X16000052	Cambridge University Press (CUP)	The Cognitive Behaviour Therapist	1754-470X	An adapted imaginal exposure approach to traditional methods used within Trauma-focused Cognitive Behavioural Therapy, trialled with a veteran population	2136	FALSE	TRUE	not applicable	unknown	cc-by	hybrid	FALSE	Wellcome Trust
PMC5144824	27990029	10.1017/S0022278X16000240	Cambridge University Press (CUP)	The Journal of modern African studies	0022-278X, 1469-7777	Seeking exposure: conversions of scientific knowledge in an African city.	1780	TRUE	not applicable	unknown	cc-by	not applicable	hybrid	TRUE	Wellcome Trust
unknown	unknown	10.1017/S0963926816000377	Cambridge University Press (CUP)	Urban History	0963-9268	Health, wealth and party in inter-war London.	2136	FALSE	TRUE	not applicable	unknown	cc-by	hybrid	FALSE	Wellcome Trust
unknown	26637397	10.3727/105221615x14399878166159	Cognizant Electronic Publishing	Gene expression	1052-2166	Cord Blood-Derived Quiescent CD34+ Cells Are More Transcriptionally Matched to AML Blasts Than Cytokine-Induced Normal Human Hematopoietic CD34+ Cells	986.98	FALSE	FALSE	not applicable	unknown	unknown	hybrid	FALSE	Bloodwise	0	0
PMC4911926	27284162	10.1101/gad.280057.116	Cold Spring Harbor Laboratory Press	Genes & development	0890-9369, 1549-5477	Quantitative lineage tracing strategies to resolve multipotency in tissue-specific stem cells.	1860.83	TRUE	not applicable	FALSE	cc-by	not applicable	hybrid	TRUE	wellcome-trust, cancer-research-uk	0	0
PMC4728378	26672018	10.1101/gr.196709.115	Cold Spring Harbor Laboratory Press	Genome research	1088-9051, 1549-5469	Building a genomic framework for prospective MRSA surveillance in the United Kingdom and the Republic of Ireland.	1641.58	TRUE	not applicable	FALSE	cc-by	cc-by	hybrid	TRUE	Wellcome Trust	MRC		98051
PMC4817767	26883546	10.1101/gr.198754.115	Cold Spring Harbor Laboratory Press	Genome research	1088-9051, 1549-5469	Great-ape Y-Chromosome and mitochondrial DNA phylogenies reflect sub-species structure and patterns of mating and dispersal	1847.86	TRUE	not applicable	FALSE	cc-by	cc-by	hybrid	TRUE	Wellcome Trust			87576
PMC4691753	26518483	10.1101/gr.193367.115	Cold Spring Harbor Laboratory Press	Genome research	1088-9051, 1549-5469	MicroRNA evolution, expression, and function during short germband development in Tribolium castaneum.	1625.72	TRUE	not applicable	FALSE	cc-by	cc-by	hybrid	TRUE	Wellcome Trust	BBSRC		093161/Z/10/Z	BB/M011275/1
PMC4864465	26941250	10.1101/gr.200840.115	Cold Spring Harbor Laboratory Press	Genome research	1088-9051, 1549-5469	Sister chromatid, but not NHEJ-mediated inter-chromosomal telomere fusions, occur independently of DNA ligases 3 and 4	1678.67	TRUE	not applicable	FALSE	cc-by	cc-by	hybrid	TRUE	Cancer Research UK	NIGMS NIH HHS	NCI NIH HHS	18246	R01 GM088351	R01 CA190492
PMC4971762	27034506	10.1101/gr.201541.115	Cold Spring Harbor Laboratory Press	Genome research	1088-9051, 1549-5469	Sperm is epigenetically programmed to regulate gene transcription in embryos	1833.32	TRUE	not applicable	FALSE	cc-by	cc-by	hybrid	TRUE	Cancer Research UK	MRC	NIGMS NIH HHS		MR/K011022/1	DP1 GM106408
PMC4448684	25883323	10.1101/gr.185371.114	Cold Spring Harbor Laboratory Press	Genome research	1088-9051, 1549-5469	Widespread exon skipping triggers degradation by nuclear RNA surveillance in fission yeast	1663.78	TRUE	not applicable	FALSE	cc-by	cc-by	hybrid	TRUE	Wellcome Trust	BBSRC		095598/Z/11/Z	95598	BB/J007153/1
PMC4317164	25524026	10.1101/gr.181990.114	Cold Spring Harbor Laboratory Press	Genome research	1088-9051, 1549-5469	RBFOX and PTBP1 proteins regulate the alternative splicing of micro-exons in human brain transcripts	1823.44	TRUE	not applicable	FALSE	cc-by	non-standard-licence	hybrid	TRUE	Wellcome Trust			090532/Z/09/Z	unknown	MC_UU_12021/1
PMC4817775	26968199	10.1101/gr.199703.115	Cold Spring Harbor Laboratory Press	Genome research	1088-9051, 1549-5469	Most microRNAs in the single-cell alga Chlamydomonas reinhardtii are produced by Dicer-like 3-mediated cleavage of introns and untranslated regions of coding RNAs.	1694.75	TRUE	not applicable	FALSE	cc-by	not applicable	hybrid	TRUE	Wellcome Trust	0	0
PMC4579355	26373834	10.1101/lm.038828.115	Cold Spring Harbor Laboratory Press	Learning & memory (Cold Spring Harbor, N.Y.)	1072-0502, 1549-5485	Sleep enhances a spatially-mediated generalisation of learned values	1566.35	TRUE	not applicable	FALSE	cc-by	cc-by	hybrid	TRUE	Wellcome Trust			094850/Z/10/Z
PMC4712670	26670622	10.1261/rna.054072.115	Cold Spring Harbor Laboratory Press	RNA (New York, N.Y.)	1355-8382, 1469-9001	Double-stranded microRNA mimics can induce length- and passenger strand-dependent effects in a cell type-specific manner.	1689.07	TRUE	not applicable	FALSE	cc-by	cc-by	hybrid	TRUE	Cancer Research UK	MRC	0	16942	unknown	unknown
PMC4836642	26917558	10.1261/rna.055301.115	Cold Spring Harbor Laboratory Press	RNA (New York, N.Y.)	1355-8382, 1469-9001	Guidelines for the functional annotation of microRNAs using the Gene Ontology	1642.64	TRUE	not applicable	FALSE	cc-by	cc-by	hybrid	TRUE	Wellcome Trust	NIGMS NIH HHS	British Heart Foundation	104967/Z/14/Z	U54GM114833	FS/13/2/29892
PMC4878611	27022035	10.1261/rna.053959.115	Cold Spring Harbor Laboratory Press	RNA (New York, N.Y.)	1355-8382, 1469-9001	How many biological replicates are needed in an RNA-seq experiment and which differential expression tool should you use?	1500	TRUE	not applicable	FALSE	cc-by	cc-by	hybrid	TRUE	Wellcome Trust	MRC	BBSRC		MR/K001744/1	BB/M004155/1
PMC4574750	26286745	10.1261/rna.052548.115	Cold Spring Harbor Laboratory Press	RNA (New York, N.Y.)	1355-8382, 1469-9001	The use of duplex-specific nuclease in ribosome profiling and a user-friendly software package for Ribo-seq data analysis.	1245.34	TRUE	not applicable	FALSE	cc-by	cc-by	hybrid	TRUE	Wellcome Trust	MRC	BBSRC	88789	MR/M011747/1	BB/L000334/1
PMC4869665	27274229	10.2147/ijn.s94255	Dove Medical Press Ltd.	International journal of nanomedicine	1176-9114, 1178-2013	Hyperthermia treatment of tumors by mesenchymal stem cell delivered superparamagnetic iron oxide nanoparticles	1758	TRUE	not applicable	unknown	cc-by	not applicable	oa	TRUE	Wellcome Trust	EPSRC		EP/G062072/1	16463
PMC4869792	27274253	10.2147/ndt.s96330	Dove Medical Press Ltd.	Neuropsychiatric disease and treatment	1176-6328, 1178-2021	The Role of Psychiatrists in Diagnosing Conversion Disorder: a mixed-methods analysis	1582.8	TRUE	not applicable	unknown	cc-by	not applicable	oa	TRUE	Wellcome Trust
PMC4920009	27350872	10.7189/jogh.06.010306	Edinburgh University Global Health Society	Journal of global health	2047-2978, 2047-2986	Global disease burden due to antibiotic resistance Â– state of the evidence	350	TRUE	not applicable	unknown	cc-by	not applicable	oa	TRUE	Wellcome Trust
PMC4908177	27259051	10.1016/j.ajhg.2016.04.012.	Elsevier	American journal of human genetics	0002-9297	A common variant at the 14q22 endometrial cancer risk locus activates AKT1 through YY1 binding	4785.71	FALSE	TRUE	not applicable	unknown	unknown	hybrid	FALSE	Wellcome Trust
PMC4821176	26772438	10.1016/j.pbiomolbio.2016.01.001	Elsevier	Progress in Biophysics and Molecular Biology	0079-6107	The Popeye Domain Containing Protein Family - A Novel Class Of Camp Effectors With Important Functions In Multiple Tissues.	2565.54	TRUE	not applicable	unknown	cc-by	not applicable	hybrid	TRUE				093488/Z/10/Z	MR/J008761/1	U01 GM110721
PMC4682169	26540015	10.1016/j.aap.2015.10.017	Elsevier BV	Accident; analysis and prevention	0001-4575, 1879-2057	An evaluation of the impact of 'Lifeskills' training on road safety, substance use and hospital attendance in adolescence	2345.36	TRUE	not applicable	unknown	cc-by	not applicable	hybrid	TRUE	Wellcome Trust	MRC		102215	MR/K006525/1	MC_PC_15018
PMC4982525	27268480	10.1016/j.actbio.2016.06.007	Elsevier BV	Acta biomaterialia	1742-7061, 1878-7568	Physical equivalency of wild type and galactose ÃŽÂ± 1,3 galactose free porcine pericardium; a new source material for bioprosthetic heart valves	1818	TRUE	not applicable	unknown	cc-by	not applicable	hybrid	TRUE	Wellcome Trust	MRC		U01 AI066310	MR/L013193/1
PMC4824014	26577984	10.1016/j.actbio.2015.11.008	Elsevier BV	Acta biomaterialia	1742-7061, 1878-7568	Engineering serendipity: High throughput discovery of materials that resist bacterial attachment	2269.17	TRUE	not applicable	unknown	cc-by	not applicable	hybrid	TRUE	Wellcome Tust	0	0	103882	103884
PMC5178864	26721555	10.1016/j.actatropica.2015.12.007	Elsevier BV	Acta tropica	0001-706X, 1873-6254	Difficulties in estimating the human burden of canine rabies	2021.14	TRUE	not applicable	unknown	cc-by	not applicable	hybrid	TRUE	Wellcome Trust (WELLCOME)	WHO			1
PMC4821061	26950256	10.1016/j.addbeh.2016.02.026	Elsevier BV	Addictive behaviors	0306-4603, 1873-6327	Comparative analysis of smoking cessation smartphone applications available in 2012 versus 2014	1276.8	TRUE	not applicable	unknown	cc-by	not applicable	hybrid	TRUE	Cancer Research UK	MRC		unknown
PMC4739061	26482290	10.1016/j.jbior.2015.09.002	Elsevier BV	Advances in biological regulation	2212-4926, 2212-4934	Time-resolved FRET reports FGFR1 dimerization and formation of a complex with its effector PLC?1	1653.38	TRUE	not applicable	unknown	cc-by	not applicable	hybrid	TRUE	Cancer Research UK			16567	BB/E000495/1	A16567
PMC4691234	26835507	10.1016/j.dadm.2015.10.001	Elsevier BV	Alzheimer's & dementia (Amsterdam, Netherlands)	2352-8729	Using florbetapir positron emission tomography to explore cerebrospinal fluid cut points and gray zones in small sample sizes	642.52	TRUE	not applicable	unknown	cc-by	not applicable	hybrid	TRUE	Wellcome Trust	MRC/EPSRC		ARUK-Network2011-6-ICE	EP/H046410/1	EP/J020990/1
PMC4908219	27236920	10.1016/j.ajhg.2016.04.007	Elsevier BV	American journal of human genetics	0002-9297, 1537-6605	A recurrent mosaic mutation of SMO encoding the hedgehog signal transducer Smoothened, is the major cause of Curry-Jones syndrome	4186.73	TRUE	not applicable	FALSE	unknown	unknown	hybrid	FALSE	Wellcome Trust	Wellcome Trust		R01 NS092772	G0902418
PMC4716680	26749309	10.1016/j.ajhg.2015.11.018	Elsevier BV	American journal of human genetics	0002-9297, 1537-6605	Autosomal dominant corneal endothelial dystrophies CHED1 and PPCD1 are allelic disorders caused by non-coding mutations in the promoter of OVOL2	1941.52	TRUE	not applicable	FALSE	cc-by	unknown	hybrid	TRUE	Wellcome Trust			92621	1415/16
PMC5005451	27374774	10.1016/j.ajhg.2016.05.021	Elsevier BV	American journal of human genetics	0002-9297, 1537-6605	Biallelic Mutations in TMEM126B Cause Severe Complex I Deficiency with a Variable Clinical Phenotype	3451.72	TRUE	not applicable	FALSE	cc-by	unknown	hybrid	TRUE	Wellcome Trust			G0601943
PMC4833291	27058447	10.1016/j.ajhg.2016.02.015	Elsevier BV	American journal of human genetics	0002-9297, 1537-6605	De novo mutations in PDE10A cause childhood-onset chorea	3528.89	TRUE	not applicable	FALSE	cc-by	unknown	hybrid	TRUE	Wellcome Trust			WT089698/Z/09/Z
PMC4596894	26387595	10.1016/j.ajhg.2015.08.011	Elsevier BV	American journal of human genetics	0002-9297, 1537-6605	Heimler Syndrome Is Caused by Hypomorphic Mutations in the Peroxisome-Biogenesis Genes PEX1 and PEX6	2371.66	TRUE	not applicable	FALSE	cc-by	unknown	hybrid	TRUE	Wellcome Trust	0	0	93113	NF-SI-0509-10185	1801/02
PMC4908194	27236921	10.1016/j.ajhg.2016.03.025	Elsevier BV	American journal of human genetics	0002-9297, 1537-6605	Polymorphism in a lincRNA associates with doubled risk of pneumococcal bacteremia in Kenyan children	4266.78	TRUE	not applicable	FALSE	cc-by	unknown	hybrid	TRUE	Wellcome Trust			294557
PMC4863561	27132592	10.1016/j.ajhg.2016.03.010	Elsevier BV	American journal of human genetics	0002-9297, 1537-6605	Recessive Mutations in TRMT10C Cause Defects in Mitochondrial RNA Processing and Multiple Respiratory Chain Deficiencies	3526.43	TRUE	not applicable	FALSE	cc-by	unknown	hybrid	TRUE	Wellcome Trust			MC_UP_1501/2	G0601943
PMC5011043	27523597	10.1016/j.ajhg.2016.06.027	Elsevier BV	American journal of human genetics	0002-9297, 1537-6605	Sudden Cardiac Death Due to Deficiency of the Mitochondrial Inorganic Pyrophosphatase PPA2	4614.4	TRUE	not applicable	FALSE	cc-by	unknown	hybrid	TRUE	Wellcome Trust			NIHR-HCS-D12-03-04	G0601943
PMC5011075	27588450	10.1016/j.ajhg.2016.07.012	Elsevier BV	American journal of human genetics	0002-9297, 1537-6605	Trans-ethnic fine-mapping highlights kidney function genes linked to salt sensitivity	4536.67	TRUE	FALSE	FALSE	cc-by	unknown	hybrid	TRUE	Wellcome Trust			K08 DK091316	R01 DK094907	T32 DK072922
PMC5176133	27555107	10.1053/j.ajkd.2016.05.018	Elsevier BV	American journal of kidney diseases : the official journal of the National Kidney Foundation	0272-6386, 1523-6838	Intermediate and Long-term outcomes of survivors of acute kidney injury episodes: A large population-based cohort study	2272.05	TRUE	not applicable	unknown	cc-by	not applicable	hybrid	TRUE
PMC4996629	27118687	10.1053/j.ajkd.2016.02.052	Elsevier BV	American journal of kidney diseases : the official journal of the National Kidney Foundation	0272-6386, 1523-6838	Smoking and adverse outcomes in patients with CKD: the study of heart and renal protection (SHARP)	2598.37	TRUE	not applicable	unknown	cc-by	not applicable	hybrid	TRUE	British Heart Foundation
PMC4977014	27287820	10.1016/j.ajo.2016.05.021	Elsevier BV	American journal of ophthalmology	0002-9394, 1879-1891	Altered patterns of fungal keratitis at a London ophthalmic referral hospital: an eight-year retrospective observational study.	2297.49	TRUE	not applicable	unknown	cc-by	not applicable	hybrid	TRUE	Wellcome Trust
PMC4977015	27296491	10.1016/j.ajo.2016.06.003	Elsevier BV	American journal of ophthalmology	0002-9394, 1879-1891	Comparison of short-wavelength reduced-illuminance and conventional autofluorescence imaging in Stargardt Macular Dystrophy	2468.88	TRUE	not applicable	unknown	cc-by	not applicable	hybrid	TRUE	Wellcome Trust	NHGRI NIH HHS			U54 HG006542
PMC5016077	27287821	10.1016/j.ajo.2016.05.024	Elsevier BV	American journal of ophthalmology	0002-9394, 1879-1891	Unilateral BEST1-associated retinopathy	2497.84	TRUE	not applicable	unknown	cc-by	not applicable	hybrid	TRUE	Wellcome Trust
PMC4982752	27544437	10.1016/j.amepre.2016.05.023	Elsevier BV	American journal of preventive medicine	0749-3797, 1873-2607	Prevalence of U.S. Pregnant Women Meeting 2015 ACOG Physical Activity Guidelines	1711.51	TRUE	not applicable	unknown	cc-by	not applicable	hybrid	TRUE	Wellcome Trust	NHLBI NIH HHS			R21 HL115385
PMC4615133	26334609	10.1016/j.ab.2015.08.025	Elsevier BV	Analytical biochemistry	0003-2697, 1096-0309	Click Chemistry Armed Enzyme Linked Immunosorbent Assay to Measure Palmitoylation by Hedgehog Acyltransferase	2367.83	TRUE	not applicable	unknown	cc-by	not applicable	hybrid	TRUE	Cancer Research UK			16402	MR/K018779/1	C6433/A16402
PMC4949398	27489622	10.1016/j.amsu.2016.07.003	Elsevier BV	Annals of medicine and surgery (2012)	2049-0801	Perioperative Use of Steroids in Neonatal Heart Surgery: Evidence Based Practice or Tradition?	644.25	TRUE	not applicable	FALSE	cc-by-nc-nd	unknown	oa	FALSE	British Heart Foundation
PMC4678293	26518228	10.1016/j.antiviral.2015.10.001	Elsevier BV	Antiviral research	0166-3542, 1872-9096	Identification of a lead like inhibitor of the hepatitis C virus non-structural NS2 autoprotease	1658.56	TRUE	not applicable	unknown	cc-by	not applicable	hybrid	TRUE	Wellcome Trust	0	0	93786
PMC5064435	26946111	10.1016/j.antiviral.2016.03.001	Elsevier BV	Antiviral research	0166-3542, 1872-9096	Inhibition of endoplasmic reticulum glucosidases is required for in vitro and in vivo dengue antiviral activity by the iminisugar UV-4	2055.92	TRUE	FALSE	FALSE	cc-by	unknown	hybrid	TRUE	Wellcome Trust			105402/Z/14/Z	097300/Z/11/Z	HHSN272201100030C
PMC4729320	26702602	10.1016/j.appet.2015.12.010	Elsevier BV	Appetite	0195-6663, 1095-8304	Visual exposure to large and small portion sizes and perceptions of portion size normality: three experimental studies	1739.2	TRUE	not applicable	unknown	cc-by	not applicable	hybrid	TRUE	Wellcome Trust			097826/Z/11/A
PMC4910837	27125430	10.1016/j.appet.2016.04.030	Elsevier BV	Appetite	0195-6663, 1095-8304	Negative stereotypes of the Scottish diet: A qualitative analysis of deep-fried Mars bar references in bestselling newspapers in Scotland, 2011-14	1992.21	TRUE	not applicable	unknown	cc-by	not applicable	hybrid	TRUE	Wellcome Trust
PMC4990060	27215837	10.1016/j.appet.2016.05.024	Elsevier BV	Appetite	0195-6663, 1095-8304	Appetitive traits and relationships with BMI in adults: Development of the adult Eating Behaviour Questionnaire	2020.22	TRUE	not applicable	unknown	cc-by	not applicable	hybrid	TRUE	Cancer Research UK
PMC4819560	26820776	10.1016/j.appet.2016.01.031	Elsevier BV	Appetite	0195-6663, 1095-8304	Encouraging children to eat more fruit and vegetables: health vs descriptive social norm-based messages	2356.31	TRUE	not applicable	unknown	cc-by	not applicable	hybrid	TRUE	Wellcome Trust			097826/Z/11/A
PMC4909753	27036851	10.1016/j.abb.2016.03.027	Elsevier BV	Archives of biochemistry and biophysics	0003-9861, 1096-0384	Mutations in troponin T associated with Hypertrophic Cardiomyopathy increase Ca2+-sensitivity and suppress the modulation of Ca2+-sensitivity by troponin I phosphorylation	2547.48	TRUE	not applicable	FALSE	cc-by-nc-nd	unknown	hybrid	FALSE				RG/11/20/29266	FS/12/24/29568
PMC4746316	26607869	10.1016/j.archger.2015.10.012	Elsevier BV	Archives of gerontology and geriatrics	0167-4943, 1872-6976	The relationship between psychological distress and multiple tender points across the adult lifespan.	1962.63	TRUE	not applicable	FALSE	cc-by-nc-nd	unknown	hybrid	FALSE				17552
PMC4914610	26696552	10.1016/j.arcmed.2015.12.003	Elsevier BV	Archives of medical research	0188-4409, 1873-5487	Differential Immune Profiles in Two Pandemic Influenza A(H1N1)pdm09 Virus Waves at Pandemic Epicenter	2259.79	TRUE	not applicable	unknown	cc-by	not applicable	hybrid	TRUE	Wellcome Trust			91663
unknown	27449322	10.1016/j.apmr.2016.06.019	Elsevier BV	Archives of physical medicine and rehabilitation	0003-9993, 1532-821X	Negative neurodynamic tests do not exclude neural dysfunction in patients with entrapment neuropathies	3073.81	FALSE	TRUE	not applicable	unknown	unknown	hybrid	FALSE	Wellcome Trust
PMC4774581	26985242	10.1016/j.artres.2015.11.001	Elsevier BV	Artery research	1872-9312, 1876-4401	A pilot study of Scanning Acoustic Microscopy as a tool for measuring arterial stiffness in aortic biopsies	2260.78	TRUE	not applicable	unknown	cc-by	not applicable	hybrid	TRUE	British Heart Foundation	Wellcome Trust
PMC4819952	26854973	10.1016/j.atherosclerosis.2016.01.038	Elsevier BV	Atherosclerosis	0021-9150, 1879-1484	Objectively measured physical activity and sedentary behaviour and ankle brachial index: cross-sectional and longitudinal associations in older men	1937.56	TRUE	not applicable	unknown	cc-by	not applicable	hybrid	TRUE	British Heart Foundation			CA154647	PDF-2010-03-23	RG/13/16/30528
PMC4773291	26752691	10.1016/j.atherosclerosis.2015.12.039	Elsevier BV	Atherosclerosis	0021-9150, 1879-1484	Low HDL cholesterol as a cardiovascular risk factor in rural, urban, and rural-urban migrants: PERU MIGRANT cohort study	2176.93	TRUE	not applicable	unknown	cc-by	not applicable	hybrid	TRUE	Wellcome Trust			GR074833MA	103994/Z/14/Z	098504/Z/12/Z
PMC4773290	26800306	10.1016/j.atherosclerosis.2015.12.009	Elsevier BV	Atherosclerosis	0021-9150, 1879-1484	Post-GWAS methodologies for localisation of functional non-coding variants: ANGPTL3	2277.41	TRUE	not applicable	unknown	cc-by	not applicable	hybrid	TRUE	British Heart Foundation			PG2008/008	FS/13/6/29977
PMC4917897	27187934	10.1016/j.atherosclerosis.2016.04.025	Elsevier BV	Atherosclerosis	0021-9150, 1879-1484	Genetic and environmental risk factors for atherosclerosis regulate transcription of phosphatase and actin regulating gene PHACTR1	2657.81	TRUE	not applicable	unknown	cc-by	not applicable	hybrid	TRUE	Wellcome Trust			G116/165
PMC4917891	27182961	10.1016/j.atherosclerosis.2016.05.017	Elsevier BV	Atherosclerosis	0021-9150, 1879-1484	Role of endothelial permeability hotspots and endothelial mitosis in determining age-related patterns of macromolecule uptake by the rabbit aortic wall near branch points	2706.27	TRUE	not applicable	FALSE	cc-by-nc-nd	unknown	hybrid	FALSE				RG/11/5/28743
PMC4871812	27157033	10.1016/j.beth.2016.02.004	Elsevier BV	Behavior therapy	0005-7894, 1878-1888	Why or How: The Effect of Concrete Versus Abstract Processing on Intrusive Memories Following Analogue Trauma	2490.81	TRUE	not applicable	unknown	cc-by	not applicable	hybrid	TRUE	Wellcome Trust
PMC4686047	26523887	10.1016/j.brat.2015.10.001	Elsevier BV	Behaviour research and therapy	0005-7967, 1873-622X	Early in-session predictors of response to trauma-focused cognitive therapy for posttraumatic stress disorder	2328.32	TRUE	not applicable	unknown	cc-by	not applicable	hybrid	TRUE	Wellcome Trust			69777
PMC4760272	26802793	10.1016/j.brat.2015.12.017	Elsevier BV	Behaviour research and therapy	0005-7967, 1873-622X	The power of positive thinking: pathological worry is reduced by thought replacement in Generalized Anxiety Disorder	2343.18	TRUE	not applicable	unknown	cc-by	not applicable	hybrid	TRUE	Wellcome Trust			WT083204	unknown
PMC4582043	26275760	10.1016/j.brat.2015.07.014	Elsevier BV	Behaviour research and therapy	0005-7967, 1873-622X	Transdiagnostic cognitive behaviour therapy for adolescents with and eating disorder who are not underweight	2386.97	TRUE	not applicable	unknown	cc-by	not applicable	hybrid	TRUE	Wellcome Trust			79113	94585	46386
PMC4898208	27203622	10.1016/j.brat.2016.05.003	Elsevier BV	Behaviour research and therapy	0005-7967, 1873-622X	Rumination and postnatal depression: a systematic review and a cognitive model	2481.76	TRUE	not applicable	unknown	cc-by	not applicable	hybrid	TRUE	Wellcome Trust			MC_PC_14096
PMC4988513	27423373	10.1016/j.brat.2016.07.002	Elsevier BV	Behaviour research and therapy	0005-7967, 1873-622X	Predictors and moderators of response to enhanced cognitive behaviour therapy and interpersonal psychotherapy for the treatment of eating disorders	2702.06	TRUE	not applicable	unknown	cc-by	not applicable	hybrid	TRUE	Wellcome Trust
PMC5214969	28110672	10.1016/j.brat.2016.08.012	Elsevier BV	Behaviour research and therapy	0005-7967, 1873-622X	The impact of digital technology on psychological treatments and their dissemination	2930.03	TRUE	FALSE	FALSE	cc-by	unknown	hybrid	TRUE	Wellcome Trust
PMC4942880	27235714	10.1016/j.bbr.2016.05.048	Elsevier BV	Behavioural brain research	0166-4328, 1872-7549	The anatomy of empathy: Vicarious experience and disorders of social cognition	2207.12	TRUE	not applicable	unknown	cc-by	not applicable	hybrid	TRUE	Wellcome Trust
PMC4998350	27449200	10.1016/j.bbr.2016.07.031	Elsevier BV	Behavioural brain research	0166-4328, 1872-7549	Perirhinal cortex lesions that impair object recognition memory spare landmark discriminations	2426.59	TRUE	not applicable	unknown	cc-by	not applicable	hybrid	TRUE	Wellcome Trust
unknown	26614900	10.1016/j.beha.2015.09.004	Elsevier BV	Best practice & research. Clinical haematology	1521-6926, 1532-1924	Long-term follow-up after purine analogue therapy in hairy cell leukaemia	2717.45	FALSE	FALSE	not applicable	unknown	unknown	hybrid	FALSE	Cancer Research UK
PMC5028014	27267455	10.1016/j.biosystems.2016.05.009	Elsevier BV	Bio Systems	0303-2647, 1872-8324	Characterization and Classification of Adherent Cells in Monolayer Culture using Automated Tracking and Evolutionary Algorithms	1627.06	TRUE	not applicable	unknown	cc-by	not applicable	hybrid	TRUE	Wellcome Trust	0	0
PMC4748010	26718405	10.1016/j.bbrc.2015.12.086	Elsevier BV	Biochemical and biophysical research communications	0006-291X, 1090-2104	Upregulation of basolateral small conductance potassium channels (KCNQ1/KCNE3) in ulcerative colitis	1322.63	TRUE	not applicable	unknown	cc-by	not applicable	hybrid	TRUE	Wellcome Trust	0	0
PMC4692451	26551456	10.1016/j.bbrc.2015.11.018	Elsevier BV	Biochemical and biophysical research communications	0006-291X, 1090-2104	Solvent exposure of Tyr10 as a probe of structural differences between monomeric and aggregated forms of the amyloid-Î² peptide.	1480.73	TRUE	not applicable	unknown	cc-by	not applicable	hybrid	TRUE	wellcome-trust,	0	0
PMC4880150	27133719	10.1016/j.bbrc.2016.04.141	Elsevier BV	Biochemical and biophysical research communications	0006-291X, 1090-2104	Lys63/Met1-hybrid ubiquitin chains are commonly formed during the activation of innate immune signalling.	1553.88	TRUE	not applicable	unknown	cc-by	not applicable	hybrid	TRUE	Wellcome Trust
PMC4727786	26707645	10.1016/j.bbrc.2015.12.060	Elsevier BV	Biochemical and biophysical research communications	0006-291X, 1090-2104	A hyperbranched dopamine-containing PEG-based polymer for the inhibition of ?-synuclein fibrillation	1627.98	TRUE	not applicable	unknown	cc-by	not applicable	hybrid	TRUE	Wellcome Trust	0	0	unknown	MR/L010305/1
PMC4709362	26325464	10.1016/j.bbrc.2015.08.109	Elsevier BV	Biochemical and biophysical research communications	0006-291X, 1090-2104	Optimising methods for the preservation, capture and identification of ubiquitin chains and ubiquitylated proteins by immunoblotting	1321.45	TRUE	not applicable	FALSE	cc-by-nc-nd	unknown	hybrid	FALSE	Wellcome Trust			WT100294	100294	MR/K000985/1
PMC5071433	26794000	10.1016/j.bcp.2015.12.015	Elsevier BV	Biochemical pharmacology	0006-2952, 1873-2968	Proteasomal inhibition potentiates drugs targeting DNA topoisomerase II	2194.54	TRUE	not applicable	unknown	cc-by	not applicable	hybrid	TRUE	Bloodwise
PMC4981491	27402344	10.1016/j.bcp.2016.07.004	Elsevier BV	Biochemical pharmacology	0006-2952, 1873-2968	Sphingosylphosphorylcholine inhibits macrophage adhesion to vascular smooth muscle cells	2648.44	TRUE	not applicable	unknown	cc-by	not applicable	hybrid	TRUE
PMC4959829	27256139	10.1016/j.bcp.2016.05.013	Elsevier BV	Biochemical pharmacology	0006-2952, 1873-2968	Interactions between amiodarone and the hERG potassium channel determined with mutagenesis and in silico docking	2921.06	TRUE	not applicable	unknown	cc-by	not applicable	hybrid	TRUE	British Heart Foundation			PG/10/96/28661	PG/14/61/31015	PG/12/69/29784
PMC5012889	27475715	10.1016/j.bcp.2016.07.018	Elsevier BV	Biochemical pharmacology	0006-2952, 1873-2968	Cardiac action of the first G protein biased small molecule apelin agonist.	3219.67	TRUE	not applicable	FALSE	cc-by	not applicable	hybrid	TRUE	British Heart Foundation	0	0
PMC5012888	27481062	10.1016/j.bcp.2016.07.020	Elsevier BV	Biochemical pharmacology	0006-2952, 1873-2968	Structure-based identification and characterisation of structurally novel human P2X7 receptor antagonists	3321.84	TRUE	not applicable	unknown	cc-by	not applicable	hybrid	TRUE	Wellcome Trust	0	0
PMC4917889	26898183	10.1016/j.bbalip.2016.01.020	Elsevier BV	Biochimica et biophysica acta	0006-3002, 1878-2434	The formation and function of ER-endosome membrane contact sites	2127.6	TRUE	not applicable	unknown	cc-by	not applicable	hybrid	TRUE	Wellcome Trust	MRC		93445	166002
PMC4884666	26874202	10.1016/j.bbamem.2016.02.007	Elsevier BV	Biochimica et biophysica acta	0006-3002, 1878-2434	Computational Virology: from the Inside Out	2747.36	TRUE	not applicable	unknown	cc-by	not applicable	hybrid	TRUE	Wellcome Trust			WT092970MA	244491-208500	EP/L000253/1
PMC4876768	27080559	10.1016/j.bbagen.2016.04.003	Elsevier BV	Biochimica et biophysica acta	0006-3002, 1878-2434	Tumor necrosis factor reduces Plasmodium falciparum growth and activates calcium signaling in human malaria parasites.	2870	TRUE	not applicable	unknown	cc-by	not applicable	hybrid	TRUE	Wellcome Trust
PMC4847476	26968097	10.1016/j.bbalip.2016.03.005	Elsevier BV	Biochimica et biophysica acta	0006-3002, 1878-2434	Dietary DHA supplementation causes selective changes in phospholipids from different brain regions in both wild type mice and the Tg2576 mouse model of Alzheimer's disease	2887.52	TRUE	not applicable	unknown	cc-by	not applicable	hybrid	TRUE	Wellcome Trust	0	0
PMC5022761	27481165	10.1016/j.bbapap.2016.07.010	Elsevier BV	Biochimica et biophysica acta	0006-3002, 1878-2434	Crystal structure of the CupB6 adhesive tip from the chaperone-usher family of pili from Pseudomonas aeruginosa	3008.31	TRUE	not applicable	unknown	cc-by	not applicable	hybrid	TRUE
PMC5104690	26577135	10.1016/j.bbamcr.2015.11.006	Elsevier BV	Biochimica et biophysica acta	0006-3002, 1878-2434	Cardiac cytoarchitecture - why the hardware is important for heart function!	2439.35	TRUE	not applicable	FALSE	cc-by-nc-nd	unknown	hybrid	FALSE	British Heart Foundation			PG/11/123/29317
unknown	27425144	10.1016/j.bbamcr.2016.07.004	Elsevier BV	Biochimica et biophysica acta	0006-3002, 1878-2434	Orphan proteins of unknown function in the mitochondrial intermembrane space proteome: new pathways and metabolic cross-talk	3227.58	FALSE	FALSE	not applicable	unknown	unknown	hybrid	FALSE	Scottish Funding Council (SFC)	Royal Society (ROYSOC)	Wellcome Trust (WELLCOME)
unknown	27033519	10.1016/j.bbamcr.2016.03.023	Elsevier BV	Biochimica et biophysica acta	0006-3002, 1878-2434	Oxidative folding in the mitochondrial intermembrane space: a regulated process important for cell physiology and disease	2715.01	FALSE	FALSE	not applicable	unknown	unknown	hybrid	FALSE	Royal Society (ROYSOC)			146122
PMC4909716	26924399	10.1016/j.biochi.2016.02.010	Elsevier BV	Biochimie	0300-9084, 1638-6183	Formate supplementation enhances folate-dependent nucleotide biosynthesis and prevents spina bifida in a mouse model of folic acid-resistant neural tube defects	1440	TRUE	not applicable	unknown	cc-by	not applicable	hybrid	TRUE	Wellcome Trust	MRC			MR/J003794/1
PMC4918731	26809249	10.1016/j.biopsych.2015.11.022	Elsevier BV	Biological psychiatry	0006-3223, 1873-2402	Hippocampal Neuroinflammation, Functional Connectivity And Depressive Symptoms In Multiple Sclerosis	2368.19	TRUE	not applicable	unknown	cc-by	not applicable	hybrid	TRUE				G0800679	MC_U120036861	G0900897
PMC4954758	26592462	10.1016/j.biopsych.2015.09.019	Elsevier BV	Biological psychiatry	0006-3223, 1873-2402	N-acetylcysteine Facilitates Self-Imposed Abstinence After Escalation of Cocaine Intake.	2374.13	TRUE	not applicable	unknown	cc-by	not applicable	hybrid	TRUE	Wellcome Trust	MRC	0	93875	G0001354	G0001354B
PMC5262437	27422368	10.1016/j.biopsych.2016.04.017	Elsevier BV	Biological psychiatry	0006-3223, 1873-2402	A Combined Pathway and Regional Heritability Analysis Indicates NETRIN1 Pathway is Associated with Major Depressive Disorder	2074.74	TRUE	FALSE	FALSE	cc-by	unknown	hybrid	TRUE	Wellcome Trust			104036	MC_PC_U127592696
unknown	27837918	10.1016/j.biopsych.2016.08.038	Elsevier BV	Biological psychiatry	0006-3223, 1873-2402	Psychosis risk factor ZNF804A localizes to synapses and regulates neurite formation and dendritic spine structure	2474.22	FALSE	TRUE	not applicable	unknown	unknown	hybrid	FALSE	Wellcome Trust
	27769568	10.1016/j.biopsych.2016.08.009	Elsevier BV	Biological psychiatry	0006-3223, 1873-2402	Specific fronto-striatal circuits for impaired cognitive flexibility and goal-directed planning in Obsessive-Compulsive Disorder: Evidence from resting-state functional connectivity	3083.89	FALSE	TRUE	not applicable	unknown	unknown	hybrid	FALSE	mrc, wellcome-trust,			93875	G1000183	MR/K020706/1
		10.1016/j.bpsc.2016.04.006	Elsevier BV	Biological Psychiatry: Cognitive Neuroscience and Neuroimaging	2451-9022	Default Mode Hypoconnectivity Underlies a Sex-Related Autism Spectrum	2539.03	FALSE	TRUE	not applicable	unknown	unknown	hybrid	FALSE	mrc, nihr, wellcome-trust, Cambridge Trust., Isaac Newton Trust, Netherlands Organization for Scientific Research	0	0
PMC4773407	26854392	10.1016/j.biomaterials.2016.01.044	Elsevier BV	Biomaterials	0142-9612, 1878-5905	The synthesis and coupling of photoreactive collagen-based peptides to restore integrin reactivity to an inert substrate, chemically-crosslinked collagen.	2847.24	TRUE	not applicable	unknown	cc-by	not applicable	hybrid	TRUE	Wellcome Trust	British Heart Foundation	0	094470/Z/10/Z	RG/09/003/27122	NH/11/1/28922
PMC4762251	26790147	10.1016/j.biomaterials.2016.01.005	Elsevier BV	Biomaterials	0142-9612, 1878-5905	Surface modification of a POSS-nanocomposite material to enhance cellular integration of a synthetic bioscaffold	2923.13	TRUE	not applicable	unknown	cc-by	not applicable	hybrid	TRUE	Wellcome Trust			unknown	G1001539	M35-F1-CD1
PMC4910873	27214650	10.1016/j.biomaterials.2016.05.011	Elsevier BV	Biomaterials	0142-9612, 1878-5905	Temporally Degradable CollagenÂ–Mimetic Hydrogels Tuned to Chondrogenesis of Human Mesenchymal Stem Cells	2930.94	TRUE	not applicable	unknown	cc-by	not applicable	hybrid	TRUE				MR/K026682/1	MR/K026666/1
PMC4993816	27475727	10.1016/j.biomaterials.2016.07.005	Elsevier BV	Biomaterials	0142-9612, 1878-5905	Dual stimulation of antigen presenting cells using carbon nanotube-based vaccine delivery system for cancer immunotherapy.	3045.6	TRUE	not applicable	unknown	cc-by	not applicable	hybrid	TRUE	Wellcome Trust
unknown	27192421	10.1016/j.biomaterials.2016.04.039	Elsevier BV	Biomaterials	0142-9612, 1878-5905	MMP-9 triggered self-assembly of doxorubicin nanofiber depots halts tumor growth	2290.8	FALSE	FALSE	not applicable	unknown	unknown	hybrid	FALSE	EPSRC	Cancer Research UK
PMC4896991	27143133	10.1016/j.bmc.2016.04.040	Elsevier BV	Bioorganic & medicinal chemistry	0968-0896, 1464-3391	Design, synthesis, and biological evaluation of new arylamide derivatives possessing sulfonate or sulfamate moieties as steroid sulfatase enzyme inhibitors	1800.29	TRUE	not applicable	unknown	cc-by	not applicable	hybrid	TRUE	Wellcome Trust
PMC4896930	27086121	10.1016/j.bmcl.2016.03.100	Elsevier BV	Bioorganic & medicinal chemistry letters	0960-894X, 1464-3405	Anilinoquinazoline inhibitors of the RET kinase domain-Elaboration of the 7-position.	1751.94	TRUE	not applicable	unknown	cc-by	not applicable	hybrid	TRUE				20465
PMC4906151	27214760	10.1016/j.bpc.2016.05.003	Elsevier BV	Biophysical chemistry	0301-4622, 1873-4200	Aqueous solubilization of C60 fullerene by natural protein surfactants, latherin and ranaspumin-2	2784.79	TRUE	not applicable	unknown	cc-by	not applicable	hybrid	TRUE	Wellcome Trust (WELLCOME)
PMC4805872	26745417	10.1016/j.bpj.2015.11.017	Elsevier BV	Biophysical journal	0006-3495, 1542-0086	Nanoscale, Voltage-driven Application Of Bio-active Substances Onto Cardiomyocyte Surface With Organized Topography	1420.91	TRUE	not applicable	FALSE	cc-by	unknown	hybrid	TRUE
PMC4643199	26536257	10.1016/j.bpj.2015.09.004	Elsevier BV	Biophysical journal	0006-3495, 1542-0086	Referenced Single-Molecule Measurements Differentiate between GPCR Oligomerization States	1403.38	TRUE	not applicable	FALSE	cc-by	unknown	hybrid	TRUE	Wellcome Trust			unknown	98274	unknown
PMC4919593	27332124	10.1016/j.bpj.2016.05.020	Elsevier BV	Biophysical journal	0006-3495, 1542-0086	Solution-based single-molecule FRET studies of K+ channel gating in a lipid bilayer	1509.58	TRUE	not applicable	FALSE	cc-by	unknown	hybrid	TRUE	Wellcome Trust
PMC4724653	26789753	10.1016/j.bpj.2015.12.012	Elsevier BV	Biophysical journal	0006-3495, 1542-0086	The Cardiac Electrophysiology Web Lab	1437.1	TRUE	not applicable	FALSE	cc-by	unknown	hybrid	TRUE	Wellcome Trust			101222/Z/13/Z	101222	unknown
PMC4699857	26682803	10.1016/j.bpj.2015.10.026	Elsevier BV	Biophysical journal	0006-3495, 1542-0086	The Nucleotide-Binding Sites of SUR1: A Mechanistic Model	1529.91	TRUE	not applicable	FALSE	cc-by	unknown	hybrid	TRUE	Wellcome Trust			89795	332620
PMC4675884	26636947	10.1016/j.bpj.2015.10.034	Elsevier BV	Biophysical journal	0006-3495, 1542-0086	Oxidative stress alters morphology and toxicity of aortic medial amyloid	1374.97	TRUE	not applicable	FALSE	cc-by-nc-nd	unknown	hybrid	FALSE	British Heart Foundation			1R21AG044723	R21 AG044723	FS/12/61/29877
unknown	27224490	10.1016/j.bpj.2016.04.017	Elsevier BV	Biophysical journal	0006-3495, 1542-0086	Angular approach Scanning Ion Conductance Microscopy	1507.33	FALSE	FALSE	not applicable	unknown	unknown	hybrid	FALSE				R01 DC014658
unknown	27119648	10.1016/j.bpj.2016.03.024	Elsevier BV	Biophysical journal	0006-3495, 1542-0086	Multisite phosphorylation of the T cell receptor zeta chain modulates potency but not the switch response	802.14	FALSE	FALSE	not applicable	unknown	unknown	hybrid	FALSE	Wellcome Trust	MRC		MR/J002011/1
PMC4720217	26456145	10.1016/j.bone.2015.10.004	Elsevier BV	Bone	8756-3282, 1873-2763	Osteolytica: An automated image analysis software package that rapidly measures cancer-induced osteolytic lesions in in vivo models with greater reproducibility compared to other commonly used methods	1130.54	TRUE	not applicable	unknown	cc-by	not applicable	hybrid	TRUE	Bloodwise			unknown
PMC4652608	26318908	10.1016/j.bone.2015.08.020	Elsevier BV	Bone	8756-3282, 1873-2763	The inhibition of human farnesyl pyrophosphate synthase by nitrogen-containing bisphosphonates. Elucidating the role of active site threonine 201 and tyrosine 204 residues using enzyme mutants	1203.87	TRUE	not applicable	unknown	cc-by	not applicable	hybrid	TRUE	Wellcome Trust			106169	092809/Z/10/Z	20522
PMC4764651	26721735	10.1016/j.bone.2015.12.014	Elsevier BV	Bone	8756-3282, 1873-2763	Deletion of the membrane complement inhibitor CD59a drives age and gender-dependent alterations to bone phenotype in mice	1622.8	TRUE	not applicable	unknown	cc-by	not applicable	hybrid	TRUE	Arthritis Research UK	Arthritis Research UK	0	18598
PMC4973893	27268854	10.1016/j.bone.2016.06.001	Elsevier BV	Bone	8756-3282, 1873-2763	A review of the methods used to define glucocorticoid exposure and risk attribution when investigating the risk of fracture in a rheumatoid arthritis population.	1774.58	TRUE	not applicable	TRUE	non-standard-licence	unknown	hybrid	FALSE				G0902272	MC_UU_12011/1	MC_UP_A620_1014
PMC5090050	27693999	10.1016/j.bandc.2016.09.010	Elsevier BV	Brain and cognition	0278-2626, 1090-2147	Predictive action tracking without motro experience in 8 months old infants	1442.74	TRUE	not applicable	unknown	cc-by	not applicable	hybrid	TRUE	Wellcome Trust Research Career Development Fellowship
PMC5029198	27429095	10.1016/j.bandc.2016.07.004	Elsevier BV	Brain and cognition	0278-2626, 1090-2147	Why is the processing of global motion impaired in adults with developmental dyslexia?	1641.86	TRUE	not applicable	unknown	cc-by	not applicable	hybrid	TRUE	Wellcome Trust	0	0
PMC4980063	27388786	10.1016/j.bandl.2016.06.004	Elsevier BV	Brain and language	0093-934X, 1090-2155	Examining the contribution of movement and language dominance to increased left lateralization during sign generation in native signers	1465.36	TRUE	not applicable	unknown	cc-by	not applicable	hybrid	TRUE	Wellcome Trust	ESRC
PMC4907128	26498877	10.1016/j.brainres.2015.10.026	Elsevier BV	Brain research	0006-8993, 1872-6240	Adaptive myelination from fish to man	1407.2	TRUE	not applicable	unknown	cc-by	not applicable	hybrid	TRUE	Wellcome Trust			102836	BB/F023243/1
PMC4986852	27378584	10.1016/j.brainres.2016.07.001	Elsevier BV	Brain research	0006-8993, 1872-6240	Co-expression of GAD67 and choline acetyltransferase in neurons in the mouse spinal cord: a focus on lamina X	1945.17	TRUE	not applicable	unknown	cc-by	not applicable	hybrid	TRUE	Wellcome Trust	0	0
PMC5282403	26903420	10.1016/j.brainres.2016.02.023	Elsevier BV	Brain research	0006-8993, 1872-6240	Retrograde optogenetic characterization of the pontospinal module of the locus coeruleus with a canine adenoviral vector	1582.23	TRUE	FALSE	FALSE	cc-by	unknown	hybrid	TRUE	Wellcome Trust			88373
PMC5010532	26923166	10.1016/j.brainres.2016.02.033	Elsevier BV	Brain research	0006-8993, 1872-6240	Adaptive Preconditioning in Neurological Diseases - Therapeutic Insights from Proteostatic Perturbations	1684.71	TRUE	not applicable	TRUE	non-standard-licence	unknown	hybrid	FALSE	Wellcome Trust			P30 DK020579	P60 DK020579	R01 DK067493
PMC4742653	26279408	10.1016/j.brs.2015.04.010	Elsevier BV	Brain stimulation	1935-861X, 1876-4754	The Homeostatic Interaction Between Anodal Transcranial Direct Current Stimulation and Motor Learning in Humans is Related to GABAA Activity	1602.86	TRUE	not applicable	unknown	cc-by	not applicable	hybrid	TRUE	Wellcome Trust			102584	102584/Z/13/Z	90955
PMC5074446	26697999	10.1016/j.bbi.2015.12.011	Elsevier BV	Brain, behavior, and immunity	0889-1591, 1090-2139	Interferon-? acutely impairs whole-brain functional connectivity network architecture Â– A preliminary study	1499.44	TRUE	not applicable	unknown	cc-by	not applicable	hybrid	TRUE	Wellcome Trust			93875
PMC4907582	26541819	10.1016/j.bbi.2015.11.001	Elsevier BV	Brain, behavior, and immunity	0889-1591, 1090-2139	Microglia regulate hippocampal neurogenesis during chronic neurodegeneration	1829.67	TRUE	not applicable	unknown	cc-by	not applicable	hybrid	TRUE	MRC	European Union	Arthritis Research UK	MR/K022687/1	ARUK-EG2014B-2
unknown	27017239	10.1016/j.breast.2015.12.004	Elsevier BV	Breast (Edinburgh, Scotland)	0960-9776, 1532-3080	Does breast composition influence late adverse effects in breast radiotherapy?	1880.65	FALSE	FALSE	not applicable	unknown	unknown	hybrid	FALSE	Cancer Research UK
PMC4712026	26766589	10.1016/j.ccell.2015.12.007	Elsevier BV	Cancer cell	1535-6108, 1878-3686	Targeting Aberrant Epigenetic Networks Mediated by PRMT1 and KDM4C in Acute Myeloid Leukemia	3904.64	TRUE	not applicable	unknown	cc-by	not applicable	hybrid	TRUE	Bloodwise	Cancer Research UK		16753	unknown	MC_UP_1102/1
PMC4796027	26977879	10.1016/j.ccell.2016.02.003	Elsevier BV	Cancer cell	1535-6108, 1878-3686	Inhibiting Drivers of Non-mutational Drug Tolerance Is a Salvage Strategy for Targeted Melanoma Therapy.	4065.5	TRUE	not applicable	unknown	cc-by	not applicable	hybrid	TRUE				unknown	12-0235	16416
PMC4819677	26797675	10.1016/j.canep.2015.12.010	Elsevier BV	Cancer epidemiology	1877-7821, 1877-783X	Post-sampling mortality and non-response patterns in the English Cancer Patient Experience Survey: Implications for epidemiological studies based on surveys of cancer patients.	1974.35	TRUE	not applicable	unknown	cc-by	not applicable	hybrid	TRUE	Cancer Research UK	0	0	unknown	18180
PMC4911595	27090942	10.1016/j.canep.2016.03.011	Elsevier BV	Cancer epidemiology	1877-7821, 1877-783X	Myeloid malignancies in the real world: occurrence progression	2580.68	TRUE	not applicable	unknown	cc-by	not applicable	hybrid	TRUE	Bloodwise	0	0
PMC5011428	27431310	10.1016/j.canlet.2016.07.009	Elsevier BV	Cancer letters	0304-3835, 1872-7980	G9a inhibition potentiates the anti-tumour activity of DNA double-strand break inducing agents by impairing DNA repair independent of p53 status.	2715.39	TRUE	not applicable	FALSE	cc-by	not applicable	hybrid	TRUE	Cancer Research UK	ERC	0		268536
unknown	26592351	10.1016/j.canlet.2015.11.018	Elsevier BV	Cancer letters	0304-3835, 1872-7980	Computational pathology: exploring the spatial dimension of tumor ecology	2101.01	FALSE	FALSE	not applicable	unknown	unknown	hybrid	FALSE	Cancer Research UK			105104	1367362
PMC4735019	26824653	10.1016/j.cell.2015.12.025	Elsevier BV	Cell	0092-8674, 1097-4172	Trim28 Haploinsufficiency Triggers Bi-stable Epigenetic Obesity.	2063.04	TRUE	not applicable	unknown	cc-by	not applicable	hybrid	TRUE	Wellcome Trust	MRC	0	095515/Z/11/Z	G0600717B	MR/J001597/1
PMC4671959	26638071	10.1016/j.cell.2015.11.005	Elsevier BV	Cell	0092-8674, 1097-4172	Redox signaling by the RNA polymerase III TFIIB-related factor Brf2	3270.25	TRUE	not applicable	unknown	cc-by	not applicable	hybrid	TRUE	Cancer Research UK			BB/K014390/1
PMC4601085	26451483	10.1016/j.cell.2015.08.069	Elsevier BV	Cell	0092-8674, 1097-4172	Lack of Neuronal IFN-Î²-IFNAR Causes Lewy Body- and Parkinson's Disease-like Dementia.	3949.13	TRUE	not applicable	unknown	cc-by	not applicable	hybrid	TRUE	wellcome-trust,	0	0	100140	unknown	95317
PMC4701712	26687357	10.1016/j.cell.2015.11.029	Elsevier BV	Cell	0092-8674, 1097-4172	Structural Basis of Vesicle Formation at the Inner Nuclear Membrane	3991.94	TRUE	not applicable	unknown	cc-by	not applicable	hybrid	TRUE	Wellcome Trust	Wellcome Trust	Wellcome Trust	090532/Z/09/Z	090895/Z/09/Z	093305/Z/10/Z
PMC4735018	26806127	10.1016/j.cell.2015.12.024	Elsevier BV	Cell	0092-8674, 1097-4172	De Novo Evolutionary Emergence of a Symmetrical Protein Is Shaped by Folding Constraints.	4027.7	TRUE	not applicable	unknown	cc-by	not applicable	hybrid	TRUE	Wellcome Trust	0	0	WT 095195
PMC4819611	27015307	10.1016/j.cell.2016.01.047	Elsevier BV	Cell	0092-8674, 1097-4172	Heterogeneity in Oct4 and Sox2 Targets Biases Cell Fate in 4-Cell Mouse Embryos.	4070.88	TRUE	not applicable	unknown	cc-by	not applicable	hybrid	TRUE	Wellcome Trust	Cancer Research UK	0	unknown
PMC4912690	27212238	10.1016/j.cell.2016.04.049	Elsevier BV	Cell	0092-8674, 1097-4172	Corpse engulfment generates a molecular memory that primes the macrophage inflammatory response in Drosophila	4119.42	TRUE	not applicable	unknown	cc-by	not applicable	hybrid	TRUE	Wellcome Trust			MR/J002577/1
PMC4771873	26919430	10.1016/j.cell.2016.02.002	Elsevier BV	Cell	0092-8674, 1097-4172	A Non-Canonical Voltage Sensing Mechanism Controls Gating in K2P K+ Channels	4216.38	TRUE	not applicable	unknown	cc-by	not applicable	hybrid	TRUE	Wellcome Trust			unknown	unknown
PMC4819607	27015311	10.1016/j.cell.2016.02.034	Elsevier BV	Cell	0092-8674, 1097-4172	Lysosomal Disorders Drive Susceptibility to Tuberculosis by Compromising Macrophage Migration.	4217.72	TRUE	not applicable	FALSE	cc-by	not applicable	hybrid	TRUE	Wellcome Trust	0	0	unknown	1DP2-OD008614	5F30HL110455
PMC4868820	27087446	10.1016/j.cell.2016.03.029	Elsevier BV	Cell	0092-8674, 1097-4172	Oncogenic KRAS Regulates Tumor Cell Signaling via Stromal Reciprocation.	4231.11	TRUE	not applicable	unknown	cc-by	not applicable	hybrid	TRUE				U54 CA112967	R01 CA096504
PMC5037319	27641504	10.1016/j.cell.2016.08.041	Elsevier BV	Cell	0092-8674, 1097-4172	A biobank of breast cancer explants with preserved intra-tumor heterogeneity to screen anticancer compounds	4537.79	TRUE	not applicable	unknown	cc-by	not applicable	hybrid	TRUE	Wellcome Trust	Cancer Research UK		unknown	660060	unknown
PMC5018252	27610576	10.1016/j.cell.2016.08.024	Elsevier BV	Cell	0092-8674, 1097-4172	Dopamine neuron-specific optogenetic stimulation in Rhesus macaques	4617.65	TRUE	not applicable	unknown	cc-by	not applicable	hybrid	TRUE	Wellcome Trust (Principal Research Fellowship and Programme Grant 095495), European Research Council (ERC Advanced Grant; 293549) and NIH Caltech Conte Center (P50MH094258).			unknown	93875	P50 MH094258
PMC4930487	27321671	10.1016/j.cell.2016.05.029	Elsevier BV	Cell	0092-8674, 1097-4172	Dynamic Axonal Translation in Developing and Mature Visual Circuits.	4224.37	TRUE	not applicable	not applicable	cc-by	not applicable	hybrid	TRUE	erc, wellcome-trust,	0	0
PMC4751977	26691915	10.1016/j.ceca.2015.11.002	Elsevier BV	Cell calcium	0143-4160, 1532-1991	Endoplasmic reticulum and lysosomal Ca2+ stores are remodelled in GBA1Ã¢Â€Â“linked Parkinson disease patient fibroblasts	2090.88	TRUE	not applicable	unknown	cc-by	not applicable	hybrid	TRUE	Parkinsons UK			WT089698	BB/G008523/1	H-1202
PMC4751975	26769314	10.1016/j.ceca.2015.12.004	Elsevier BV	Cell calcium	0143-4160, 1532-1991	Oxygen Uptake Efficiency Slope And Breathing Reserve, Not Anaerobic Threshold, Discriminate Between Patients With Cardiovascular Disease Over Copd	2170.83	TRUE	not applicable	unknown	cc-by	not applicable	hybrid	TRUE	Wellcome Trust			WT095531/Z/11/Z	WT098424AIA	102828/Z/13/Z
PMC4751975	26769314	10.1016/j.ceca.2015.12.004	Elsevier BV	Cell calcium	0143-4160, 1532-1991	Oxygen Uptake Efficiency Slope And Breathing Reserve, Not Anaerobic Threshold, Discriminate Between Patients With Cardiovascular Disease Over Copd	2368.19	TRUE	not applicable	unknown	cc-by	not applicable	hybrid	TRUE	Wellcome Trust			WT095531/Z/11/Z	WT098424AIA	102828/Z/13/Z
PMC4969632	27072326	10.1016/j.ceca.2016.04.001	Elsevier BV	Cell calcium	0143-4160, 1532-1991	Physiology of spontaneous [Ca(2+)]i oscillations in the isolated vasopressin and oxytocin neurones of the rat supraoptic nucleus.	2730.69	TRUE	not applicable	unknown	cc-by	not applicable	hybrid	TRUE
PMC4760754	27028887	10.1016/j.chembiol.2015.11.015	Elsevier BV	Cell chemical biology	2451-9456	Accurate Prediction of Ligand Affinities for a Proton-Dependent Oligopeptide Transporter	4176.55	TRUE	not applicable	unknown	cc-by	not applicable	hybrid	TRUE	Wellcome Trust	Wellcome Trust		092970/788Z/10/Z	102890/Z/13/Z
PMC5026699	27631699	10.1016/j.chom.2016.08.003	Elsevier BV	Cell host & microbe	1931-3128, 1934-6069	Signal integration by the IkB protein pickle shapes drosophila innate host defence	3793.95	TRUE	not applicable	unknown	cc-by	not applicable	hybrid	TRUE
PMC5061559	27173931	10.1016/j.chom.2016.04.020	Elsevier BV	Cell host & microbe	1931-3128, 1934-6069	Epigenetic Regulation of Virulence Gene Expression in Parasitic Protozoa	3957.72	TRUE	not applicable	unknown	cc-by	not applicable	hybrid	TRUE	Wellcome Trust
PMC5075283	27640936	10.1016/j.chom.2016.08.006	Elsevier BV	Cell host & microbe	1931-3128, 1934-6069	Resistance of transmitted founder HIV-1 to IFITM-mediated restriction	4429.64	TRUE	not applicable	unknown	cc-by	not applicable	hybrid	TRUE	Wellcome Trust			281698	R01 AI114266	R01 AI111789
PMC4985559	27512905	10.1016/j.chom.2016.07.007	Elsevier BV	Cell host & microbe	1931-3128, 1934-6069	Mycobacterial acid tolerance enables phagolysosomal survival and establishment of tuberculous infection in vivo	4617.14	TRUE	not applicable	unknown	cc-by	not applicable	hybrid	TRUE	nih, wellcome-trust, BRC			F30 HL110455	R01 AI076327	T32 HD007233
PMC4873617	27157046	10.1016/j.cmet.2016.04.012	Elsevier BV	Cell metabolism	1550-4131, 1932-7420	A Deletion in the Canine POMC Gene Is Associated with Weight and Appetite in Obesity-Prone Labrador Retriever Dogs.	4170.1	TRUE	not applicable	FALSE	cc-by	not applicable	hybrid	TRUE	mrc, wellcome-trust, Dogs Trust	0	0	MC_UU_12012/5
PMC4873619	27133131	10.1016/j.cmet.2016.04.001	Elsevier BV	Cell metabolism	1550-4131, 1932-7420	Mapping the human platelet lipidome reveals cytosolic phospholipase A2 as a regulator of mitochondrial bioenergetics during activation.	4376.63	TRUE	not applicable	unknown	cc-by	not applicable	hybrid	TRUE	Wellcome Trust	0	0	U54 HL117798
PMC5031559	27546460	10.1016/j.cmet.2016.07.024	Elsevier BV	Cell metabolism	1550-4131, 1932-7420	The pentose phosphate pathway regulates the circadian clock	4544.26	TRUE	not applicable	unknown	cc-by	not applicable	hybrid	TRUE	erc, mrc, wellcome-trust,			281348	MC_UU_12012/5	MC_UP_1201/4
PMC4646840	26526995	10.1016/j.celrep.2015.09.066	Elsevier BV	Cell reports	2211-1247	Rapid modulation of axon initial segment length influences repetitive spike firing	1916.74	TRUE	not applicable	unknown	cc-by	not applicable	oa	TRUE	Wellcome Trust			unknown	1247878	unknown
PMC4709258	26725109	10.1016/j.celrep.2015.12.013	Elsevier BV	Cell reports	2211-1247	Uncovering the Number and Clonal Dynamics of Mesp1 Progenitors during Heart Morphogenesis.	2827.52	TRUE	not applicable	unknown	cc-by	not applicable	oa	TRUE	wellcome-trust, erc	0	0	97922	98357	098357/Z/12/Z
PMC4678118	26655907	10.1016/j.celrep.2015.10.056	Elsevier BV	Cell reports	2211-1247	ADF and Cofilin1 control actin stress fibers, nuclear integrity and cell survival	3344.75	TRUE	not applicable	unknown	cc-by	not applicable	oa	TRUE	Cancer Research UK			15703	C157/A15703	C157/A11682
PMC4594159	26387948	10.1016/j.celrep.2015.08.053	Elsevier BV	Cell reports	2211-1247	Visualization of the Serratia Type VI Secretion System Reveals Unprovoked Attacks and Dynamic Assembly.	3401.29	TRUE	not applicable	unknown	cc-by	not applicable	oa	TRUE	Wellcome Trust			097945/B/11/Z	104556	97945
PMC4709259	26686643	10.1016/j.celrep.2015.11.045	Elsevier BV	Cell reports	2211-1247	Mevalonate Pathway Regulates Cell Size Homeostasis and Proteostasis through Autophagy.	3453.77	TRUE	not applicable	unknown	cc-by	not applicable	oa	TRUE	Wellcome Trust	Cancer Research UK		97945	089999/Z/09/Z	unknown
PMC4700048	26711332	10.1016/j.celrep.2015.11.008	Elsevier BV	Cell reports	2211-1247	Crystal Structure of the Herpesvirus nuclear egress complex provides insights into inner nuclear membrane remodelling	3458.29	TRUE	not applicable	unknown	cc-by	not applicable	oa	TRUE	Wellcome Trust	Wellcome Trust	Wellcome Trust	090532/Z/09/Z	090895/Z/09/Z	060208/Z/00/Z
PMC4805855	26972000	10.1016/j.celrep.2016.02.043	Elsevier BV	Cell reports	2211-1247	Substrate-Trapped Interactors of PHD3 and FIH Cluster in Distinct Signaling Pathways	3468	TRUE	not applicable	unknown	cc-by	not applicable	oa	TRUE	Cancer Research UK			C157/A18075
PMC4835543	27050518	10.1016/j.celrep.2016.03.031	Elsevier BV	Cell reports	2211-1247	Mesolimbic dopamine encodes prediction errors in a state-dependent manner	3544.59	TRUE	not applicable	unknown	cc-by	not applicable	oa	TRUE	Wellcome Trust			WT090051MA
PMC4920892	27292648	10.1016/j.celrep.2016.05.054	Elsevier BV	Cell reports	2211-1247	T-bet activates Th1 genes through Mediator and the Super Elongation Complex	3714.73	TRUE	not applicable	unknown	cc-by	not applicable	oa	TRUE	Wellcome Trust	BBSRC		BB/L009277/1	G0400503	MR/M003493/1
PMC4977274	27452473	10.1016/j.celrep.2016.06.078	Elsevier BV	Cell reports	2211-1247	Distinct metabolic requirements of exhausted and functional virus-specific CD8 T cells in the same host	3847.98	TRUE	not applicable	unknown	cc-by	not applicable	oa	TRUE	Wellcome Trust	MRC
PMC5067282	27705781	10.1016/j.celrep.2016.09.004	Elsevier BV	Cell reports	2211-1247	Loss of dendritic complexity precedes neurodegeneration in a mouse model with disrupted mitochondrial distribution in mature dendrites	3873.6	TRUE	not applicable	unknown	cc-by	not applicable	oa	TRUE	Wellcome Trust			282430
PMC4660216	26549443	10.1016/j.celrep.2015.09.085	Elsevier BV	Cell reports	2211-1247	Ephrin-Bs drive junctional downregulation and acti	3896.1	TRUE	not applicable	unknown	cc-by	not applicable	oa	TRUE	MRC	Wellcome Trust		097791/Z/11/Z	97791	G0901822
PMC4977272	27452456	10.1016/j.celrep.2016.06.089	Elsevier BV	Cell reports	2211-1247	mRNA Cap Methylation in Pluripotency and Differentiation	3920.33	TRUE	not applicable	unknown	cc-by	not applicable	oa	TRUE	Wellcome Trust			MR/K024213/1	G0700240
PMC4670868	26586434	10.1016/j.celrep.2015.10.034	Elsevier BV	Cell reports	2211-1247	Adenoviral Vector Vaccination Induces a Conserved Program of CD8+ T Cell Memory Differentiation in Mouse and Man	3983.45	TRUE	not applicable	unknown	cc-by	not applicable	oa	TRUE	Wellcome Trust			WT091663MA	91663	2412
PMC4597099	26411678	10.1016/j.celrep.2015.08.066	Elsevier BV	Cell reports	2211-1247	APOBEC3B Mediated Cytidine Deamination is Required for Estrogen Receptor Action in Breast Cancer	3985.92	TRUE	not applicable	unknown	cc-by	not applicable	oa	TRUE				12011	16942	unknown
PMC4675724	26655903	10.1016/j.celrep.2015.10.052	Elsevier BV	Cell reports	2211-1247	Inactivation of the Class II PI3K-C2? Potentiates Insulin Signaling and Sensitivity	3990.17	TRUE	not applicable	unknown	cc-by	not applicable	oa	TRUE	Cancer Research UK	BBSRC		BB/I003916/1	BB/I007806/1	BB/J004456/1
PMC4713864	26771241	10.1016/j.celrep.2015.12.041	Elsevier BV	Cell reports	2211-1247	Compartmentalised epidermal activation of <beta>-catenin differentially affects lineage reprogramming and underlies tumour heterogeneity	4024.4	TRUE	not applicable	unknown	cc-by	not applicable	oa	TRUE	Wellcome Trust			096540/Z/11/Z	96540	unknown
PMC4695334	26686634	10.1016/j.celrep.2015.11.040	Elsevier BV	Cell reports	2211-1247	Context-Specific Effects of TGF-Î²/SMAD3 in Cancer Are Modulated by the Epigenome.	4039.32	TRUE	not applicable	unknown	cc-by	not applicable	oa	TRUE	cancer-research-uk,	0	0	16942
PMC4688035	26628376	10.1016/j.celrep.2015.11.004	Elsevier BV	Cell reports	2211-1247	Brown Adipose Tissue Thermogenic Capacity Is Regulated by Elovl6.	4044.64	TRUE	not applicable	unknown	cc-by	not applicable	oa	TRUE	bbsrc, mrc, wellcome-trust, EU Framework 7 Betabat	0	0	090662/Z/09/Z	BB/H002731/1	BB/H013539/1
PMC5063952	27117413	10.1016/j.celrep.2016.03.091	Elsevier BV	Cell reports	2211-1247	PYY-dependent restoration of impaired insulin and glucagon secretion in type-2 diabetes following Roux-En-Y gastric bypass surgery	4157.42	TRUE	not applicable	unknown	cc-by	not applicable	oa	TRUE	Wellcome Trust
PMC4695336	26670050	10.1016/j.celrep.2015.11.026	Elsevier BV	Cell reports	2211-1247	Regulation of mRNA Levels by Decay-Promoting Introns that Recruit the Exosome Specificity Factor Mmi1	4161.32	TRUE	not applicable	unknown	cc-by	not applicable	oa	TRUE	Wellcome Trust			WT091549	WT088359MA	WT106994MA
PMC4850359	27068460	10.1016/j.celrep.2016.03.041	Elsevier BV	Cell reports	2211-1247	Lithium promotes longevity through GSK3/NRF2-dependent hormesis	4199.75	TRUE	not applicable	unknown	cc-by	not applicable	oa	TRUE	Wellcome Trust			unknown	ART-PG2009-4
PMC4742565	26804912	10.1016/j.celrep.2015.12.082	Elsevier BV	Cell reports	2211-1247	Single-Cell RNA-Sequencing Reveals a Continuous Spectrum of Differentiation in Hematopoietic Cells.	4213.7	TRUE	not applicable	unknown	cc-by	not applicable	oa	TRUE	cancer-research-uk, mrc, wellcome-trust,	0	0	unknown	14953	1581868
PMC4819907	26997266	10.1016/j.celrep.2016.02.062	Elsevier BV	Cell reports	2211-1247	CYLD limits Lys63- and Met1-linked ubiquitin at receptor complexes to regulate innate immune signaling	4242.39	TRUE	not applicable	unknown	cc-by	not applicable	oa	TRUE	Wellcome Trust			102894/Z/13/Z	U105192732	309756
PMC4859837	27117407	10.1016/j.celrep.2016.03.081	Elsevier BV	Cell reports	2211-1247	Alternative splice forms influence functions of Whrn in mechanosensory hair cell stereocilia	4323.78	TRUE	not applicable	unknown	cc-by	not applicable	oa	TRUE	Wellcome Trust			Z01 DC000002
PMC4978700	27477283	10.1016/j.celrep.2016.07.002	Elsevier BV	Cell reports	2211-1247	Restriction by SAMHD1 limits cGAS/STING-dependent innate and adaptive immune responses to HIV-1	4571.52	TRUE	not applicable	unknown	cc-by	not applicable	oa	TRUE	Wellcome Trust
PMC4870521	27134179	10.1016/j.celrep.2016.04.009	Elsevier BV	Cell reports	2211-1247	Augmentation of Recipient Adaptive Alloimmunity by Donor Passenger Lymphocytes within the Transplant.	4139.09	TRUE	not applicable	FALSE	cc-by-nc-nd	unknown	oa	FALSE	wellcome-trust, bhf, nihr,	0	0
PMC4695337	26686639	10.1016/j.celrep.2015.11.042	Elsevier BV	Cell reports	2211-1247	Crystal Structure of a Eukaryotic GEN1 Resolving Enzyme Bound to DNA	3453.77	TRUE	not applicable	FALSE	cc-by-nc-nd	unknown	oa	FALSE	Wellcome Trust			unknown	90944	11722
PMC4700049	26711346	10.1016/j.celrep.2015.11.050	Elsevier BV	Cell reports	2211-1247	Disrupted PI3K p110Î´ Signaling Dysregulates Maternal Immune Cells and Increases Fetal Mortality In Mice.	4039.32	TRUE	not applicable	FALSE	cc-by-nc-nd	unknown	oa	FALSE	nihr, wellcome-trust, Centre for Trophoblast Research	0	0	094073/Z/10/Z
PMC4978703	27452468	10.1016/j.celrep.2016.06.097	Elsevier BV	Cell reports	2211-1247	Inhibition of the Polyamine Synthesis Pathway Is Synthetically Lethal with Loss of Argininosuccinate Synthase 1.	3779.27	TRUE	not applicable	FALSE	cc-by-nc-nd	unknown	oa	FALSE
PMC4823467	26947065	10.1016/j.celrep.2016.02.038	Elsevier BV	Cell reports	2211-1247	Localized Translation of gurken/TGF-? mRNA during Axis Specification Is Controlled by Access to Orb/CPEB on Processing Bodies	4229.82	TRUE	not applicable	FALSE	cc-by-nc-nd	unknown	oa	FALSE	Wellcome Trust	Wellcome Trust	Wellcome Trust	96144	97304
PMC4893157	27160911	10.1016/j.celrep.2016.04.036	Elsevier BV	Cell reports	2211-1247	Sustained E2F-dependent transcription is a key mechanism to prevent replication stress-induced DNA damage	4150.58	TRUE	not applicable	FALSE	cc-by-nc-nd	unknown	oa	FALSE	Cancer Research UK	MRC		MC_EX_G0800785
PMC4906370	27239041	10.1016/j.celrep.2016.05.001	Elsevier BV	Cell reports	2211-1247	The Hemogenic Competence of Endothelial Progenitors Is Restricted by Runx1 Silencing during Embryonic Development.	2088.24	TRUE	not applicable	FALSE	cc-by-nc-nd	unknown	oa	FALSE
PMC5061553	26686641	10.1016/j.celrep.2015.11.034	Elsevier BV	Cell reports	2211-1247	The localization and action of topoisomerase IV in Escherichia coli chromosome segregation is coordinated by the SMC complex, MukBEF	3532.85	TRUE	not applicable	FALSE	cc-by-nc-nd	unknown	oa	FALSE	Wellcome Trust			099204/Z/12Z	99204
unknown	26804905	10.1016/j.celrep.2015.12.099	Elsevier BV	Cell reports	2211-1247	Diversity of the CD4 T Cell Alloresponse: The Short and the Long of It.	4152.25	FALSE	FALSE	not applicable	unknown	unknown	oa	FALSE	nihr, wellcome-trust,	0	0	unknown	FS/10/018/28193	unknown
PMC4899423	27151457	10.1016/j.stem.2016.03.021	Elsevier BV	Cell stem cell	1934-5909, 1875-9777	Identification and correction of mechanisms underlying inherited blindness in human iPSC-derived optic cups	3514.08	TRUE	not applicable	unknown	cc-by	not applicable	hybrid	TRUE	Wellcome Trust
PMC4712187	26712580	10.1016/j.stem.2015.11.017	Elsevier BV	Cell stem cell	1934-5909, 1875-9777	Human-Mouse Chimerism Validates Human Stem Cell Pluripotency.	3750.7	TRUE	not applicable	unknown	cc-by	not applicable	hybrid	TRUE	british-heart-foundation, mrc, nih, nihr, wellcome-trust,	0	0	unknown	97922	1R21ID012228
PMC4826446	27049876	10.1016/j.stem.2016.03.003	Elsevier BV	Cell stem cell	1934-5909, 1875-9777	2D and 3D Stem Cell Models of Primate Cortical Development Identify Species-Specific Differences in Progenitor Behavior Contributing to Brain Size.	4210.36	TRUE	not applicable	FALSE	cc-by	not applicable	hybrid	TRUE	cancer-research-uk, wellcome-trust,	0	0	unknown
PMC5065525	27424783	10.1016/j.stem.2016.06.011	Elsevier BV	Cell stem cell	1934-5909, 1875-9777	Molecular Criteria for Defining the Naive Human Pluripotent State.	4628.6	TRUE	not applicable	FALSE	cc-by	not applicable	hybrid	TRUE	wellcome-trust, snsf, erc, hhmi	0	0	R01 CA084198	268721
unknown	27494674	10.1016/j.stem.2016.07.018	Elsevier BV	Cell stem cell	1934-5909, 1875-9777	Contributions of mammalian chimeras to pluripotent stem cell research	4685.1	FALSE	FALSE	not applicable	unknown	unknown	hybrid	FALSE	british-heart-foundation, mrc, nihr, wellcome-trust,
PMC4802415	27136688	10.1016/j.cels.2016.01.003	Elsevier BV	Cell systems	2405-4712, 2405-4720	Bistability in the Rac1, PAK and RhoA signaling network drives actin cytoskeleton dynamics and cell motility switches	3390	TRUE	not applicable	unknown	cc-by	not applicable	hybrid	TRUE	Breast Cancer Now			R01 GM104184	P50 GM071558
PMC5003814	27453442	10.1016/j.cels.2016.06.011	Elsevier BV	Cell systems	2405-4712, 2405-4720	Deep Proteome Analysis Identifies Age-Related Processes inÂ C.Â elegans	3919.17	TRUE	not applicable	unknown	cc-by	not applicable	hybrid	TRUE	Wellcome Trust			R01 AG011816	P40 OD010440
PMC4711336	26617281	10.1016/j.cellimm.2015.10.006	Elsevier BV	Cellular immunology	0008-8749, 1090-2163	TGF-ÃŸ in tolerance, development and regulation of immunity	1398	TRUE	not applicable	unknown	cc-by	not applicable	hybrid	TRUE	Wellcome Trust			106122
PMC4872538	26475678	10.1016/j.cellsig.2015.10.003	Elsevier BV	Cellular signalling	0898-6568, 1873-3913	Sustained exposure to catecholamines affects cAMP/PKA compartmentalised signalling in adult rat ventricular myocytes	1868.6	TRUE	not applicable	unknown	cc-by	not applicable	hybrid	TRUE	British Heart Foundation	British Heart Foundation	British Heart Foundation	PG/10/75/28537	RG/12/3/29423	PG/15/5/31110
PMC4913619	27063355	10.1016/j.cellsig.2016.03.014	Elsevier BV	Cellular signalling	0898-6568, 1873-3913	Effect of the sphingosine kinase 1 selective inhibitor, PF-543 on arterial and cardiac remodeling in a hypoxic model of pulmonary arterial hypertension	1898.73	TRUE	not applicable	unknown	cc-by	not applicable	hybrid	TRUE	British Heart Foundation			PG/12/24/29476
unknown	26898828	10.1016/j.cellsig.2016.02.009	Elsevier BV	Cellular signalling	0898-6568, 1873-3913	Regulation of BRAF protein stability by a negative feedback loop involving the MEK-Â¬?ERK pathway but not the FBXW7 tumour suppressor	1960.28	FALSE	FALSE	not applicable	unknown	unknown	hybrid	FALSE	Cancer Research UK
PMC4732990	26721196	10.1016/j.cbi.2015.12.014	Elsevier BV	Chemico-biological interactions	0009-2797, 1872-7786	Mechanism for the acute effects of organophosphate pesticides on the adult 5-HT system	1735.9	TRUE	not applicable	unknown	cc-by	not applicable	hybrid	TRUE	Wellcome Trust			unknown
PMC4579271	26320862	10.1016/j.chembiol.2015.07.017	Elsevier BV	Chemistry & biology	1074-5521, 1879-1301	Inflammatory Signaling by NOD-RIPK2 Is Inhibited by Clinically Relevant Type II Kinase Inhibitors	3966.94	TRUE	not applicable	unknown	cc-by	not applicable	hybrid	TRUE	Wellcome Trust			106169	102894/Z/13/Z	102894
PMC4740456	26270185	10.1378/chest.15-0647	Elsevier BV	Chest	0012-3692, 1931-3543	Transcriptional profiling of endobronchial ultrasound-guided lymph node samples aids diagnosis of mediastinal lymphadenopathy	3219.21	TRUE	not applicable	unknown	cc-by	not applicable	hybrid	TRUE	Wellcome Trust			WT091730AIA	91730	M470
PMC4893823	26836936	10.1016/j.chest.2016.01.024	Elsevier BV	Chest	0012-3692, 1931-3543	NADPH oxidase 4 over-expression is associated with epithelial ciliary dysfunction in neutrophilic asthma	4665.66	TRUE	not applicable	unknown	cc-by	not applicable	hybrid	TRUE	Wellcome Trust			NF-SI-0512-10030	07/007
PMC5023843	26806137	10.1016/j.cmi.2015.11.024	Elsevier BV	Clinical microbiology and infection : the official publication of the European Society of Clinical Microbiology and Infectious Diseases	1198-743X, 1469-0691	Healthcare-associated Crimean-Congo haemorrhagic fever in Turkey, 2002Â–2014: a multicentre retrospective cross-sectional study	3027.48	TRUE	not applicable	unknown	cc-by	not applicable	hybrid	TRUE	Wellcome Trust
unknown	27172808	10.1016/j.cmi.2016.04.024	Elsevier BV	Clinical microbiology and infection : the official publication of the European Society of Clinical Microbiology and Infectious Diseases	1198-743X, 1469-0691	Parasitic helminth infections and the control of human allergic and autoimmune disorders	2565.38	FALSE	FALSE	not applicable	unknown	unknown	hybrid	FALSE
PMC4803022	26971483	10.1016/j.clinph.2016.01.015	Elsevier BV	Clinical neurophysiology : official journal of the International Federation of Clinical Neurophysiology	1388-2457, 1872-8952	Subthalamic nucleus phase-amplitude coupling correlates with motor impairment in ParkinsonÂ’s disease	1636.8	TRUE	not applicable	unknown	cc-by	not applicable	hybrid	TRUE	Wellcome Trust	MRC/EPSRC		091593/Z/10/Z	91593	MC_UU_12024/1
PMC4840013	27072097	10.1016/j.clinph.2016.01.026	Elsevier BV	Clinical neurophysiology : official journal of the International Federation of Clinical Neurophysiology	1388-2457, 1872-8952	In-depth performance analysis of an EEG based neonatal seizure detection algorithm	2117.33	TRUE	not applicable	unknown	cc-by	not applicable	hybrid	TRUE	Wellcome Trust			unknown
PMC5034854	27514722	10.1016/j.clinph.2016.07.007	Elsevier BV	Clinical neurophysiology : official journal of the International Federation of Clinical Neurophysiology	1388-2457, 1872-8952	Phenobarbital reduces EEG amplitude and propagation of neonatal seizures but does not alter performance of automated seizure detection	2263.19	TRUE	not applicable	unknown	cc-by	not applicable	hybrid	TRUE	Wellcome Trust
unknown	26874911	10.1016/j.clnu.2016.01.013	Elsevier BV	Clinical nutrition (Edinburgh, Scotland)	0261-5614, 1532-1983	Dietary pattern, inflammation and cognitive decline: the Whitehall II Prospective Cohort Study	1636	FALSE	TRUE	not applicable	unknown	unknown	hybrid	FALSE	British Heart Foundation	MRC		MR/K013351/1
unknown	26868286	10.1016/j.clon.2016.01.011	Elsevier BV	Clinical oncology (Royal College of Radiologists (Great Britain))	0936-6555, 1433-2981	Do patient-reported outcome measures agree with clinical and photographic assessments of normal tissue effects after breast radiotherapy?	2093.63	FALSE	FALSE	not applicable	unknown	unknown	hybrid	FALSE	Cancer Research UK			1947-01-09	NF-SI-0510-10026	G9600656
PMC4786636	26407540	10.1016/j.cpr.2015.09.001	Elsevier BV	Clinical psychology review	0272-7358, 1873-7811	The role of sleep dysfunction in the occurrence of delusions and hallucinations: A systematic review	1447.56	TRUE	not applicable	unknown	cc-by	not applicable	hybrid	TRUE	Wellcome Trust			098461/Z/12/Z	98461	RP-2014-05-003
PMC4683162	26139384	10.1016/j.crad.2015.05.006	Elsevier BV	Clinical radiology	0009-9260, 1365-229X	Cardiovascular magnetic resonance feature-tracking assessment of myocardial mechanics: Intervendor agreement and considerations regarding reproducibility	1838.83	TRUE	not applicable	unknown	cc-by	not applicable	hybrid	TRUE	Wellcome Trust			099973/Z/12/Z
PMC4681448	26593288	10.1016/j.cld.2015.08.002	Elsevier BV	Clinics in liver disease	1089-3261, 1557-8224	The immunogenetics of autoimmune cholestasis	2378.3	TRUE	not applicable	unknown	cc-by	not applicable	hybrid	TRUE	Wellcome Trust	0	0	MR/L001489/1
PMC4955252	27295330	10.1016/j.cognition.2016.05.013	Elsevier BV	Cognition	0010-0277, 1873-7838	The role of spatial boundaries in shaping long-term event representations	1182	TRUE	not applicable	unknown	cc-by	not applicable	hybrid	TRUE	Wellcome Trust	MRC
PMC4675632	26539969	10.1016/j.cognition.2015.10.017	Elsevier BV	Cognition	0010-0277, 1873-7838	Prospective and Pavlovian mechanisms in aversive behaviour	1367.57	TRUE	not applicable	unknown	cc-by	not applicable	hybrid	TRUE	Wellcome Trust			91593	98362
unknown	unknown	10.1016/j.cbpra.2016.03.007	Elsevier BV	Cognitive and Behavioral Practice	1077-7229	Seeing is believing: Using video feedback in cognitive therapy for social anxiety disorder	2515.97	FALSE	TRUE	not applicable	unknown	unknown	hybrid	FALSE	Wellcome Trust
PMC4981317	27546982	10.1016/j.cogdev.2016.03.004	Elsevier BV	Cognitive development	0885-2014	Longitudinal development of visual working memory precision in childhood and early adolescence	1524.02	TRUE	not applicable	unknown	cc-by	not applicable	hybrid	TRUE	Wellcome Trust	0	0
PMC4959416	27423344	10.1016/j.comppsych.2016.05.004	Elsevier BV	Comprehensive psychiatry	0010-440X, 1532-8384	Association between childhood psychiatric disorders and psychotic experiences in adolescence: A population-based longitudinal study.	2114.52	TRUE	not applicable	FALSE	cc-by	not applicable	hybrid	TRUE	mrc, nihr, wellcome-trust,	0	0	102215	93875	RP-PG-0606-1335
PMC4988484	27594707	10.1016/j.cpc.2016.04.011	Elsevier BV	Computer physics communications	0010-4655	An adaptable parallel algorithm for the direct numerical simulation of incompressible turbulent flows using a Fourier spectral/hp element method and MPI virtual topologies	1842.3	TRUE	not applicable	unknown	cc-by	not applicable	hybrid	TRUE				EP/H000208/1	FS/11/22/28745	EP/I037946/1
PMC4907311	27108088	10.1016/j.compmedimag.2016.03.004	Elsevier BV	Computerized medical imaging and graphics : the official journal of the Computerized Medical Imaging Society	0895-6111, 1879-0771	A novel methodology for personalized simulations of ventricular hemodynamics from noninvasive imaging data	4106.46	TRUE	not applicable	unknown	cc-by	not applicable	hybrid	TRUE	British Heart Foundation			NH/11/5/29058
PMC5083253	27241897	10.1016/j.contraception.2016.05.007	Elsevier BV	Contraception	0010-7824, 1879-0518	Postpartum uptake of contraception in rural northern Malawi: a prospective study.	1867.24	TRUE	not applicable	unknown	cc-by	not applicable	hybrid	TRUE	Wellcome Trust
PMC4533227	25967086	10.1016/j.cortex.2015.04.003	Elsevier BV	Cortex; a journal devoted to the study of the nervous system and behavior	0010-9452, 1973-8102	Dopamine enhances willingness to exert effort for reward in Parkinson's disease	1426.38	TRUE	not applicable	unknown	cc-by	not applicable	hybrid	TRUE	Wellcome Trust			98282	J-1403	J-0901
PMC4729321	26673945	10.1016/j.cortex.2015.11.004	Elsevier BV	Cortex; a journal devoted to the study of the nervous system and behavior	0010-9452, 1973-8102	Fronto-striatal organization: Defining functional and microstructural substrates of behavioural flexibility.	1649.61	TRUE	not applicable	unknown	cc-by	not applicable	hybrid	TRUE	nihr, wellcome-trust, mrc	0	0	95844	93875	093705/Z/10/Z
PMC4819950	26889604	10.1016/j.cortex.2016.01.007	Elsevier BV	Cortex; a journal devoted to the study of the nervous system and behavior	0010-9452, 1973-8102	A physiological signature of sound meaning in dementia	1779.93	TRUE	not applicable	unknown	cc-by	not applicable	hybrid	TRUE	Wellcome Trust	MRC		091673/Z/10/Z	2417	MR/M008525/1
PMC4786053	26874940	10.1016/j.cortex.2016.01.005	Elsevier BV	Cortex; a journal devoted to the study of the nervous system and behavior	0010-9452, 1973-8102	Human ventromedial prefrontal lesions alter incentivisation by reward	1837.68	TRUE	not applicable	unknown	cc-by	not applicable	hybrid	TRUE	Wellcome Trust			98282
PMC4962765	27236372	10.1016/j.cortex.2016.04.009	Elsevier BV	Cortex; a journal devoted to the study of the nervous system and behavior	0010-9452, 1973-8102	Blink reflex magnitude is continuously adjusted according to current and predicted stimulus position with respect to the face	1958.28	TRUE	not applicable	unknown	cc-by	not applicable	hybrid	TRUE	Wellcome Trust
PMC4729287	26649914	10.1016/j.cortex.2015.10.019	Elsevier BV	Cortex; a journal devoted to the study of the nervous system and behavior	0010-9452, 1973-8102	Preserved memory-based orienting of attention with impaired explicit memory in healthy ageing	1969.8	TRUE	not applicable	unknown	cc-by	not applicable	hybrid	TRUE	Wellcome Trust			104571	104571/Z/14/Z
PMC4962776	27173975	10.1016/j.cortex.2016.04.012	Elsevier BV	Cortex; a journal devoted to the study of the nervous system and behavior	0010-9452, 1973-8102	Attentional bias towards and away from fearful faces is modulated by developmental amygdala damage	1976.05	TRUE	not applicable	unknown	cc-by	not applicable	hybrid	TRUE	Wellcome Trust			309865
PMC4865502	27085491	10.1016/j.cortex.2016.01.015	Elsevier BV	Cortex; a journal devoted to the study of the nervous system and behavior	0010-9452, 1973-8102	Visual short-term memory binding deficit in familial Alzheimer's Disease	1985.42	TRUE	not applicable	unknown	cc-by	not applicable	hybrid	TRUE	Wellcome Trust			NF-SI-0513-10134	ARUK-SRF2013-8
PMC4884670	27088615	10.1016/j.cortex.2016.03.007	Elsevier BV	Cortex; a journal devoted to the study of the nervous system and behavior	0010-9452, 1973-8102	The anterior temporal cortex is a primary semantic source of top-down influences on object recognition.	2024.98	TRUE	not applicable	unknown	cc-by	not applicable	hybrid	TRUE				MR/J004146/1
PMC4865523	26995225	10.1016/j.cortex.2016.02.009	Elsevier BV	Cortex; a journal devoted to the study of the nervous system and behavior	0010-9452, 1973-8102	A third-person perspective on co-speech action gestures in Parkinson's disease.	2024.99	TRUE	not applicable	unknown	cc-by	not applicable	hybrid	TRUE
PMC5043407	27565636	10.1016/j.cortex.2016.07.021	Elsevier BV	Cortex; a journal devoted to the study of the nervous system and behavior	0010-9452, 1973-8102	No fixed item limit in visuospatial working memory	2429.74	TRUE	not applicable	unknown	cc-by	not applicable	hybrid	TRUE	wellcome-trust,
PMC4981429	27389803	10.1016/j.cortex.2016.05.001	Elsevier BV	Cortex; a journal devoted to the study of the nervous system and behavior	0010-9452, 1973-8102	Convergent evidence for hierarchical prediction networks from human electrocorticography and magnetoencephalography.	2031.23	TRUE	not applicable	FALSE	non-standard-licence	unknown	hybrid	FALSE	mrc, wellcome-trust, Cam CAN, MacDonnell Foundation, bbsrc	0	0	93875	G1000183B	G1000183
unknown	26861557	10.1016/j.cortex.2015.11.024	Elsevier BV	Cortex; a journal devoted to the study of the nervous system and behavior	0010-9452, 1973-8102	Repetition suppression and its contextual determinants in predictive coding	1784.76	FALSE	FALSE	not applicable	unknown	unknown	hybrid	FALSE	Wellcome Trust			91593
PMC4691239	26671670	10.1016/j.cub.2015.10.063	Elsevier BV	Current biology : CB	0960-9822, 1879-0445	Energy efficient information transfer by visual pathway synapses	3138.34	TRUE	not applicable	unknown	cc-by	not applicable	hybrid	TRUE	Wellcome Trust			unknown	unknown
PMC4557747	26096975	10.1016/j.cub.2015.05.038	Elsevier BV	Current biology : CB	0960-9822, 1879-0445	Reward Pays the Cost of Noise Reduction in Motor and Cognitive Control	3243.11	TRUE	not applicable	unknown	cc-by	not applicable	hybrid	TRUE	Wellcome Trust			WT090201MA	WT098282	98282
PMC4819517	26972318	10.1016/j.cub.2016.01.042	Elsevier BV	Current biology : CB	0960-9822, 1879-0445	Grid-like processing of imagined navigation	3411.95	TRUE	not applicable	unknown	cc-by	not applicable	hybrid	TRUE	Wellcome Trust	MRC		unknown	91593	unknown
PMC4791429	26898464	10.1016/j.cub.2016.01.017	Elsevier BV	Current biology : CB	0960-9822, 1879-0445	Hippocampal sharp-wave ripples influence selective activation	3413.92	TRUE	not applicable	unknown	cc-by	not applicable	hybrid	TRUE	Wellcome Trust			91593	295129
PMC4920952	27265392	10.1016/j.cub.2016.05.017	Elsevier BV	Current biology : CB	0960-9822, 1879-0445	Risk taking for potential rewards decreases across the lifespan	3424.96	TRUE	not applicable	unknown	cc-by	not applicable	hybrid	TRUE	Wellcome Trust			91593	98362
PMC4906267	27161502	10.1016/j.cub.2016.03.070	Elsevier BV	Current biology : CB	0960-9822, 1879-0445	Individual neuronal subtypes exhibit diversity in CNS myelination mediated by synaptic vesicle release	3586.45	TRUE	not applicable	unknown	cc-by	not applicable	hybrid	TRUE	Wellcome Trust			R01 NS050223
	25619767	10.1016/j.cub.2014.12.012	Elsevier BV	Current biology : CB	0960-9822, 1879-0445	Olfactory neuromodulation of motion vision circuitry in Drosophila.	3672.05	TRUE	not applicable	unknown	cc-by	not applicable	hybrid	TRUE	Wellcome Trust			WT085026MA	R01 MH076900	R01 MH107390
PMC4728079	26774782	10.1016/j.cub.2015.11.061	Elsevier BV	Current biology : CB	0960-9822, 1879-0445	Temporal regulation of Lipin activity diverged to account for differences in mitotic programs	3676.8	TRUE	not applicable	unknown	cc-by	not applicable	hybrid	TRUE	Wellcome Trust			103741/Z/14/Z	103741	R01 GM101035
PMC5026704	27524482	10.1016/j.cub.2016.07.017	Elsevier BV	Current biology : CB	0960-9822, 1879-0445	Increased glucose transport into neurons rescues AÃŸ toxicity in Drosophila	3751.48	TRUE	not applicable	unknown	cc-by	not applicable	hybrid	TRUE	Wellcome Trust
PMC4712170	26711494	10.1016/j.cub.2015.10.066	Elsevier BV	Current biology : CB	0960-9822, 1879-0445	Dissociable Learning Processes Underlie Human Pain Conditioning.	3774.48	TRUE	not applicable	unknown	cc-by	not applicable	hybrid	TRUE	wellcome-trust,	0	0	unknown
PMC4691240	26687620	10.1016/j.cub.2015.10.065	Elsevier BV	Current biology : CB	0960-9822, 1879-0445	Genetic Control over mtDNA and Its Relationship to Major Depressive Disorder	3810.56	TRUE	not applicable	unknown	cc-by	not applicable	hybrid	TRUE	Wellcome Trust	Wellcome Trust	Wellcome Trust	WT089269/Z/09/Z	WT083573/Z/07/Z	WT090532/Z/09/Z
PMC4691242	26670998	10.1016/j.cub.2015.10.028	Elsevier BV	Current biology : CB	0960-9822, 1879-0445	Mother Centriole Distal Appendages Mediate Centrosome Docking at the Immunological Synapse and Reveal Mechanistic Parallels with Ciliogenesis.	3841.05	TRUE	not applicable	unknown	cc-by	not applicable	hybrid	TRUE	wellcome-trust,	0	0	100140	103930	75880
PMC5106371	27773570	10.1016/j.cub.2016.08.016	Elsevier BV	Current biology : CB	0960-9822, 1879-0445	Reversed procrastination by focal disruption of medial frontal cortex	3901.62	TRUE	not applicable	unknown	cc-by	not applicable	hybrid	TRUE	Wellcome Trust			U01 NS090407
PMC5106387	27825445	10.1016/j.cub.2016.09.025	Elsevier BV	Current biology : CB	0960-9822, 1879-0445	Gravitational cues modulate the shape of defensive peripersonal space	3912.37	TRUE	not applicable	unknown	cc-by	not applicable	hybrid	TRUE	Wellcome Trust
PMC4771920	26853366	10.1016/j.cub.2015.12.043	Elsevier BV	Current biology : CB	0960-9822, 1879-0445	Cell Competition Drives the Growth of Intestinal Adenomas in Drosophila.	3929.88	TRUE	not applicable	unknown	cc-by	not applicable	hybrid	TRUE	cancer-research-uk, royal-society, wellcome-trust, Dutch Cancer Society, EMBO, NWO	0	0	92096	C6946/A14492	A12460
PMC4728078	26725202	10.1016/j.cub.2015.11.055	Elsevier BV	Current biology : CB	0960-9822, 1879-0445	Kinetoplastid Phylogenomics Reveals theEvolutionary Innovations Associated with the Originsof Parasitism	3952.73	TRUE	not applicable	unknown	cc-by	not applicable	hybrid	TRUE	Wellcome Trust
PMC4714572	26387712	10.1016/j.cub.2015.08.007	Elsevier BV	Current biology : CB	0960-9822, 1879-0445	The role of recent admixture in forming the contemporary west Eurasia genomic landscape	4094.21	TRUE	not applicable	unknown	cc-by	not applicable	hybrid	TRUE	Wellcome Trust	Wellcome Trust		098387/Z/12/Z	098386/Z/12/Z	98386
PMC4985561	27426513	10.1016/j.cub.2016.06.012	Elsevier BV	Current biology : CB	0960-9822, 1879-0445	Systems analysis of the dynamic inflammatory response to tissue damage	4158.44	TRUE	not applicable	unknown	cc-by	not applicable	hybrid	TRUE	MRC	Wellcome Trust	BBSRC	BB/K018027/1	NC/K001949/1	MR/J002577/1
PMC4826436	27020741	10.1016/j.cub.2016.02.031	Elsevier BV	Current biology : CB	0960-9822, 1879-0445	Ancient anxiety pathways influence Drosophila defense behaviors	4168.03	TRUE	not applicable	unknown	cc-by	not applicable	hybrid	TRUE	Wellcome Trust			unknown
PMC4985558	27374336	10.1016/j.cub.2016.05.054	Elsevier BV	Current biology : CB	0960-9822, 1879-0445	Changing balance of spinal cord excitability and nociceptive brain activity in early human development	4193.28	TRUE	not applicable	unknown	cc-by	not applicable	hybrid	TRUE	Wellcome Trust
PMC4819512	26948883	10.1016/j.cub.2016.01.040	Elsevier BV	Current biology : CB	0960-9822, 1879-0445	Learning and recognition of a non-conscious sequence of events in human primary visual cortex	4330.62	TRUE	not applicable	unknown	cc-by	not applicable	hybrid	TRUE	Wellcome Trust			WT073735MA	89631
PMC5069351	27618263	10.1016/j.cub.2016.07.039	Elsevier BV	Current biology : CB	0960-9822, 1879-0445	Membrane binding by CHMP7 coordinates ESCRT-III dependent nuclear envelope reformation	4350.69	TRUE	not applicable	unknown	cc-by	not applicable	hybrid	TRUE	Wellcome Trust
unknown	unknown	10.1016/j.cobeha.2016.08.002	Elsevier BV	Current Opinion in Behavioral Sciences	2352-1546	An efficiency framework for valence processing systems inspired by soft cross-wiring	2842.42	FALSE	TRUE	not applicable	unknown	unknown	hybrid	FALSE	Wellcome Trust
PMC5023845	26775243	10.1016/j.ceb.2015.12.001	Elsevier BV	Current opinion in cell biology	0955-0674, 1879-0410	The ESCRT machinery: new roles at new holes	3045.51	TRUE	not applicable	unknown	cc-by	not applicable	hybrid	TRUE	Wellcome Trust			093603/Z/10/Z
PMC5094910	26930633	10.1016/j.ceb.2016.02.013	Elsevier BV	Current opinion in cell biology	0955-0674, 1879-0410	Adhesion protein networks reveal functions proximal and distal to cellmatrix contacts	3343.29	TRUE	not applicable	unknown	cc-by	not applicable	hybrid	TRUE	Cancer Research UK			C157/A15703
PMC5061558	27423045	10.1016/j.cbpa.2016.06.031	Elsevier BV	Current opinion in chemical biology	1367-5931, 1879-0402	Chemical genetics approaches for selective intervention in epigenetics	3668.34	TRUE	not applicable	FALSE	cc-by-nc-nd	unknown	hybrid	FALSE	Wellcome Trust			311460	BB/J001201/2	BB/G023123/2
PMC4720706	26433090	10.1016/j.gde.2015.08.009	Elsevier BV	Current opinion in genetics & development	0959-437X, 1879-0380	Transcriptional enhancers: functional insights and role in human disease	2973.31	TRUE	not applicable	unknown	cc-by	not applicable	hybrid	TRUE				101033	MR/L02036X/1
PMC5113120	27318097	10.1016/j.gde.2016.05.014	Elsevier BV	Current opinion in genetics & development	0959-437X, 1879-0380	Evolution of developmental signalling in Dictyostelid social amoebas.	3456.57	TRUE	not applicable	unknown	cc-by	not applicable	hybrid	TRUE	Wellcome Trust			BB/K000799/1
PMC4779149	26210959	10.1016/j.conb.2015.07.002	Elsevier BV	Current opinion in neurobiology	0959-4388, 1873-6882	Molecular neurobiological clues to the pathogenesis of bipolar disorder	2869.51	TRUE	not applicable	unknown	cc-by	not applicable	hybrid	TRUE	Wellcome Trust			98461	102616
PMC4863523	26774693	10.1016/j.conb.2015.12.007	Elsevier BV	Current opinion in neurobiology	0959-4388, 1873-6882	Multiple signals in anterior cingulate cortex	3257.71	TRUE	not applicable	unknown	cc-by	not applicable	hybrid	TRUE	Wellcome Trust			104765	G0700399
PMC4444583	25102772	10.1016/j.sbi.2014.07.003	Elsevier BV	Current opinion in structural biology	0959-440X, 1879-033X	Convergent And Divergent Mechanisms Of Sugar Recognition Across Kingdoms	2422.66	TRUE	not applicable	unknown	cc-by	not applicable	hybrid	TRUE				93599	BB/K007718/1
unknown	27341016	10.1016/j.sbi.2016.06.007	Elsevier BV	Current opinion in structural biology	0959-440X, 1879-033X	Molecular dynamics simulations of membrane proteins and their interactions: From nanoscale to mesoscale	3475.98	FALSE	FALSE	not applicable	unknown	unknown	hybrid	FALSE	Wellcome Trust
PMC4837217	26821299	10.1016/j.cyto.2016.01.007	Elsevier BV	Cytokine	1043-4666, 1096-0023	Genetic loci on chromosome 5 are associated with circulating levels of interleukin-5 and eosinophil count in a European population with high risk for cardiovascular disease	2651.84	TRUE	not applicable	unknown	cc-by	not applicable	hybrid	TRUE	British Heart Foundation/Wellcome Trust			unknown	FS/14/55/30806	RG008/08
PMC4906234	27260207	10.1016/j.jcyt.2016.04.005	Elsevier BV	Cytotherapy	1465-3249, 1477-2566	Cryopreservation of human mesenchymal stromal cells expressing TRAIL for human anti-cancer therapy	2108.45	TRUE	not applicable	unknown	cc-by	not applicable	hybrid	TRUE	Wellcome Trust	MRC		MR/M015831/1
PMC4833123	27115029	10.1016/j.dib.2016.03.090	Elsevier BV	Data in brief	2352-3409	Longitudinal data on cortical thickness before and after working memory training	427.36	TRUE	not applicable	unknown	cc-by	not applicable	oa	TRUE	Wellcome Trust	0	0
PMC4689119	26793748	10.1016/j.dib.2015.11.014	Elsevier BV	Data in brief	2352-3409	Glycan microarray analysis of the carbohydrate-recognition specificity of native and recombinant forms of the lectin ArtinM	187.87	TRUE	not applicable	FALSE	cc-by-nc-nd	unknown	oa	FALSE
PMC4947970	27108075	10.1016/j.dci.2016.04.016	Elsevier BV	Developmental and comparative immunology	0145-305X, 1879-0089	Analysis of the function of IL-10 in chickens using specific neutralising antibodies and a sensitive capture ELISA	2829.71	TRUE	not applicable	unknown	cc-by	not applicable	hybrid	TRUE	Wellcome Trust			BB/L004046/1	BB/L004003/1
PMC4906250	27270042	10.1016/j.devcel.2016.05.005	Elsevier BV	Developmental cell	1534-5807, 1878-1551	AnnexinA1 tethers membrane contact sites that mediate ER to endosome cholesterol transport	3387.56	TRUE	not applicable	unknown	cc-by	not applicable	hybrid	TRUE	Wellcome Trust	MRC		G0801878
PMC4865533	27165554	10.1016/j.devcel.2016.04.008	Elsevier BV	Developmental cell	1534-5807, 1878-1551	The molecular basis of radial intercalation during tissue spreading in early development	3517.88	TRUE	not applicable	unknown	cc-by	not applicable	hybrid	TRUE	Wellcome Trust	MRC/BBSRC
PMC4906249	27270040	10.1016/j.devcel.2016.05.006	Elsevier BV	Developmental cell	1534-5807, 1878-1551	KAT7/HBO1/MYST2 regulates CENP-A chromatin assembly by antagonizing Suv39h1-mediated centromere inactivationCorresponding author	3555.29	TRUE	not applicable	unknown	cc-by	not applicable	hybrid	TRUE	Wellcome Trust
PMC4643313	26555056	10.1016/j.devcel.2015.10.011	Elsevier BV	Developmental cell	1534-5807, 1878-1551	Lineage-Specific Profiling Delineates the Emergence and Progression of Naive Pluripotency in Mammalian Embryogenesis.	3771.83	TRUE	not applicable	unknown	cc-by	not applicable	hybrid	TRUE	bbsrc, mrc, wellcome-trust, EMBL, Louis Jeantet Foundation	0	0	unknown	97922	BB/G015678/1
PMC4729543	26812015	10.1016/j.devcel.2015.12.027	Elsevier BV	Developmental cell	1534-5807, 1878-1551	Maternal DNA Methylation Regulates Early Trophoblast Development.	3959.22	TRUE	not applicable	unknown	cc-by	not applicable	hybrid	TRUE				101225/Z/13/Z	101225	95645
PMC4825408	27046834	10.1016/j.devcel.2016.03.001	Elsevier BV	Developmental cell	1534-5807, 1878-1551	An FGFR1-SPRY2 Signaling Axis Limits Basal Cell Proliferation in the Steady-State Airway Epithelium.	4136.92	TRUE	not applicable	FALSE	cc-by	not applicable	hybrid	TRUE	cancer-research-uk, mrc, wellcome-trust,	0	0	92096	G0900424	C6946/A14492
PMC4921775	27237791	10.1016/j.devcel.2016.05.003	Elsevier BV	Developmental cell	1534-5807, 1878-1551	Transient Fcho1/2â‹…Eps15/Râ‹…AP-2 Nanoclusters Prime the AP-2 Clathrin Adaptor for Cargo Binding.	4165.78	TRUE	not applicable	FALSE	cc-by	not applicable	hybrid	TRUE	wellcome-trust,	0	0	R01 GM106963
PMC4943857	27404359	10.1016/j.devcel.2016.06.010	Elsevier BV	Developmental cell	1534-5807, 1878-1551	Patronin/Shot Cortical Foci Assemble the Noncentrosomal Microtubule Array that Specifies the Drosophila Anterior-Posterior Axis.	4167.66	TRUE	not applicable	FALSE	cc-by	not applicable	hybrid	TRUE	cancer-research-uk, wellcome-trust,	0	0
PMC4918730	27326932	10.1016/j.devcel.2016.05.022	Elsevier BV	Developmental cell	1534-5807, 1878-1551	Cdk1 phosphorylates Drosophila Sas-4 to recruit Polo to daughter centrioles and convert them to centrosomes	4193.28	TRUE	not applicable	unknown	cc-by	not applicable	hybrid	TRUE	Wellcome Trust
PMC5022528	27623383	10.1016/j.devcel.2016.08.005	Elsevier BV	Developmental cell	1534-5807, 1878-1551	Rac1 Controls Both the Secretory Function of the Mammary Gland and Its Remodeling for Successive Gestations	4618.4	TRUE	not applicable	unknown	cc-by	not applicable	hybrid	TRUE	The Wellcome Trust
PMC4913558	26802367	10.1016/j.dcn.2015.12.013	Elsevier BV	Developmental cognitive neuroscience	1878-9293, 1878-9307	Functional MRI of emotional memory in adolescent depression.	1191.64	TRUE	not applicable	unknown	cc-by	not applicable	oa	TRUE	mrc, nihr, wellcome-trust,	0	0	93875	G0001354	G0001354B
PMC4649773	26318840	10.1016/j.dcn.2015.08.004	Elsevier BV	Developmental cognitive neuroscience	1878-9293, 1878-9307	An EEG study on the somatopic organisation of sensorimotor cortex activation during action execution and observation in infancy	1413.14	TRUE	not applicable	unknown	cc-by	not applicable	oa	TRUE	Wellcome Trust Research Career Development Fellowship			088427/Z/09/Z	MR/K021389/1
PMC4994576	27485851	10.1016/j.diabres.2016.05.001	Elsevier BV	Diabetes research and clinical practice	0168-8227, 1872-8227	Diebetes mellitus in Zambia and the Western Cape province of South Africa: prevalence, risk factors, diagnosis and management.	2315.01	TRUE	not applicable	unknown	cc-by	not applicable	hybrid	TRUE	Wellcome Trust
PMC4769092	26712266	10.1016/j.diagmicrobio.2015.11.008	Elsevier BV	Diagnostic microbiology and infectious disease	0732-8893, 1879-0070	Comparison of 2 chromogenic media for the detection of extended-spectrum Î²-lactamase producing Enterobacteriaceae stool carriage in nursing home residents.	1909.58	TRUE	not applicable	unknown	cc-by	not applicable	hybrid	TRUE	wellcome-trust, Department of Health (this is a joint WT/DoH funding through Health Innovation Challenge Fund)	0	0	WT098600	98600	unknown
PMC4950902	27312688	10.1016/j.diagmicrobio.2016.04.026	Elsevier BV	Diagnostic microbiology and infectious disease	0732-8893, 1879-0070	Comparison of two chromogenic media for the detection of vancomycin-resistant enterococcal carriage by nursing home residents.	2331.88	TRUE	not applicable	FALSE	cc-by	not applicable	hybrid	TRUE	wellcome-trust, Department of Health, nihr	0	0	98600
PMC4798848	26723900	10.1016/j.dnarep.2015.11.004	Elsevier BV	DNA repair	1568-7864, 1568-7856	TP53 and lacZ mutagenesis induced by 3-nitrobenzanthrone in Xpa-deficient human TP53 knock-in mouse embryo fibroblasts	2647.44	TRUE	not applicable	unknown	cc-by	not applicable	hybrid	TRUE	Wellcome Trust	Cancer Research UK	Institute of Cancer Research	101126/Z/13/Z	101126/B/13/Z	101126
unknown	27345316	10.1016/j.domaniend.2016.01.002	Elsevier BV	Domestic animal endocrinology	0739-7240, 1879-0054	Intrapituitary mechanisms underlying the control of fertility: key players in seasonal breeding	2440.44	FALSE	FALSE	not applicable	unknown	unknown	hybrid	FALSE	BBSRC	Wellcome Trust	MRC
PMC4686045	26507173	10.1016/j.drugalcdep.2015.10.014	Elsevier BV	Drug and alcohol dependence	0376-8716, 1879-0046	Perceived relative harm of electronic cigarettes over time and impact on subsequent use. A survey with 1-year and 2-year follow-ups	970.26	TRUE	not applicable	unknown	cc-by	not applicable	hybrid	TRUE	Cancer Research UK			19540	unknown	MR/K023195/1
PMC4841788	26994665	10.1016/j.drugalcdep.2016.02.039	Elsevier BV	Drug and alcohol dependence	0376-8716, 1879-0046	Six-year outcome of alcohol use disorders in men: a population . . .	2280.42	TRUE	not applicable	unknown	cc-by	not applicable	hybrid	TRUE	Wellcome Trust			WT093897MA
PMC4909717	26891981	10.1016/j.drudis.2016.02.003	Elsevier BV	Drug discovery today	1359-6446, 1878-5832	Recent developments in using mechanistic cardiac modelling for drug safety evaluation	3204.44	TRUE	not applicable	unknown	cc-by	not applicable	hybrid	TRUE	Wellcome Trust			101222
unknown	27329269	10.1016/j.drudis.2016.06.017	Elsevier BV	Drug discovery today	1359-6446, 1878-5832	Alternative RNA splicing: contribution to pain and potential therapeutic strategy.	3157	FALSE	FALSE	not applicable	unknown	unknown	hybrid	FALSE	Arthritis Research UK	Other	0
PMC4740301	26870787	10.1016/j.ebiom.2015.09.027	Elsevier BV	EBioMedicine	2352-3964	Distinct Transcriptional and Anti-Mycobacterial Profiles of Peripheral Blood Monocytes Dependent on the Ratio of Monocytes: Lymphocytes	2402.87	TRUE	not applicable	unknown	cc-by	not applicable	oa	TRUE	Wellcome Trust			88891	090532/Z/09/Z	74318
PMC4919605	27428423	10.1016/j.ebiom.2016.04.018	Elsevier BV	EBioMedicine	2352-3964	Glycosylation is an Androgen-Regulated Process Essential for Prostate Cancer Cell Viability	2528.65	TRUE	not applicable	unknown	cc-by	not applicable	oa	TRUE	Wellcome Trust			PG12-34	BB/J007293/1
PMC4917893	27084417	10.1016/j.endeavour.2016.03.005	Elsevier BV	Endeavour	0160-9327, 1873-1929	Toxic confusion: the dilemma of antibiotic regulation in West German food production (1951-1990)	649.6	TRUE	not applicable	unknown	cc-by	not applicable	hybrid	TRUE	Wellcome Trust
PMC5053369	27499462	10.1016/j.endeavour.2016.07.001	Elsevier BV	Endeavour	0160-9327, 1873-1929	Prisoners of Solitude: Bringing History to Bear on Prison Health Policy	685.77	TRUE	not applicable	unknown	cc-by	not applicable	hybrid	TRUE	Wellcome Trust	0	0
PMC5180595	28018012	10.1016/j.engstruct.2015.09.043	Elsevier BV	Engineering structures	0141-0296, 1873-7323	Experimental identification of the behaviour of and lateral forces from freely-walking pedestrians on laterally oscillating structures in a virtual reality environment	1954.48	TRUE	not applicable	unknown	cc-by	not applicable	hybrid	TRUE	EPSRC	Wellcome Trust
PMC4829072	26894816	10.1016/j.envres.2016.02.011	Elsevier BV	Environmental research	0013-9351, 1096-0953	Feasibility of hair sampling to assess levels of organophosphate metabolites in rural areas of Sri Lanka	2231.35	TRUE	not applicable	unknown	cc-by	not applicable	hybrid	TRUE	Wellcome Trust			WT099874MA
PMC4962771	27389785	10.1016/j.etap.2016.06.020	Elsevier BV	Environmental toxicology and pharmacology	1382-6689, 1872-7077	The application of the comet assay to assess the genotoxicity of environmental pollutants in the nematode Caenorhabditis elegans	2416.16	TRUE	not applicable	unknown	cc-by	not applicable	hybrid	TRUE	Cancer Research UK			NE/L006782/1
PMC4773590	26972511	10.1016/j.epidem.2015.08.003	Elsevier BV	Epidemics	1755-4365, 1878-0067	Use of bacterial whole-genome sequencing to investigate local persistence and spread in bovine tuberculosis	1363.81	TRUE	not applicable	unknown	cc-by	not applicable	oa	TRUE	Wellcome Trust (WELLCOME)			081696/Z/06/Z	BB/L010569/1
PMC4819482	26590798	10.1016/j.eplepsyres.2015.10.003	Elsevier BV	Epilepsy research	0920-1211, 1872-6844	Variants in KCNJ11 and BAD do not predict response to ketogenic dietary therapies for epilepsy	1418	TRUE	not applicable	unknown	cc-by	not applicable	hybrid	TRUE	Wellcome Trust	MRC		84730	98395
PMC4788505	26920822	10.1016/j.ejca.2015.12.018	Elsevier BV	European journal of cancer (Oxford, England : 1990)	0959-8049, 1879-0852	Is cancer a good way to die? A population-based survey among middle-aged and older adults in the UK	2165.58	TRUE	not applicable	unknown	cc-by	not applicable	hybrid	TRUE	Cancer Research UK			C1418/A14134	14134
PMC4778608	26773420	10.1016/j.ejca.2015.12.007	Elsevier BV	European journal of cancer (Oxford, England : 1990)	0959-8049, 1879-0852	Cyclophosphamide pharmacokinetics and pharmacogenetics in children with B-cell non-Hodgkin's lymphoma	2537.3	TRUE	not applicable	unknown	cc-by	not applicable	hybrid	TRUE	Cancer Research UK			unknown
PMC4920641	27235782	10.1016/j.ejca.2016.04.014	Elsevier BV	European journal of cancer (Oxford, England : 1990)	0959-8049, 1879-0852	Taking stock and looking ahead: behavioral science lessons for implementing the nonavalent HPV vaccine	2740.98	TRUE	not applicable	unknown	cc-by	not applicable	hybrid	TRUE	Cancer Research UK			17219
unknown	26802529	10.1016/j.ejca.2015.12.008	Elsevier BV	European journal of cancer (Oxford, England : 1990)	0959-8049, 1879-0852	Evaluation of response after pre-operative radiotherapy in soft tissue sarcomas: the European Organisation for Research and Treatment of Cancer-Soft Tissue and Bone Sarcoma Group (EORTC-STBSG) and Imaging Group recommendations for radiological examination and reporting with an emphasis on magnetic resonance imaging	2444.86	FALSE	FALSE	not applicable	unknown	unknown	hybrid	FALSE	Cancer Research UK			P30 CA016672
PMC5078494	27807469	10.1016/j.eujim.2016.05.006	Elsevier BV	European journal of integrative medicine	1876-3820, 1876-3839	Using psychological theory and qualitative methods to develop a new evidence-based website about acupuncture for back pain	1424.71	TRUE	not applicable	unknown	cc-by	not applicable	hybrid	TRUE	Arthritis Research UK	0	0
PMC4638191	26479031	10.1016/j.ejmech.2015.10.007	Elsevier BV	European journal of medicinal chemistry	0223-5234, 1768-3254	Multicomponent reaction-based synthesis and biological evaluation of tricyclic heterofused quinolines with multi-trypanosomatid activity.	2065.97	TRUE	not applicable	unknown	cc-by	not applicable	hybrid	TRUE	Wellcome Trust			WT084175
PMC4607724	26408453	10.1016/j.ejmech.2015.08.044	Elsevier BV	European journal of medicinal chemistry	0223-5234, 1768-3254	Discovery and optimisation studies of antimalarial phenotypic hits.	2107.15	TRUE	not applicable	unknown	cc-by	not applicable	hybrid	TRUE	Wellcome Trust			83481
PMC4762250	26854430	10.1016/j.ejmech.2015.12.037	Elsevier BV	European journal of medicinal chemistry	0223-5234, 1768-3254	Novel cis-selective and non-epimerisable C3 hydroxy azapodophyllotoxins targeting microtubules in cancer cells	2379.37	TRUE	not applicable	unknown	cc-by	not applicable	hybrid	TRUE	Cancer Research UK	0	0
PMC4872591	27060763	10.1016/j.ejmech.2016.03.064	Elsevier BV	European journal of medicinal chemistry	0223-5234, 1768-3254	An evaluation of Minor Groove Binders as anti-Trypanosoma brucei brucei therapeutics	2464.87	TRUE	not applicable	unknown	cc-by	not applicable	hybrid	TRUE	Wellcome Trust (WELLCOME)
PMC4896931	26874741	10.1016/j.ejmech.2016.01.039	Elsevier BV	European journal of medicinal chemistry	0223-5234, 1768-3254	The discovery of 2-substituted phenol quinazolines as potent RET kinase inhibitors with improved KDR selectivity.	2485.32	TRUE	not applicable	unknown	cc-by	not applicable	hybrid	TRUE				10115	10332	C480/A11411
PMC5111791	27592390	10.1016/j.ejmech.2016.08.047	Elsevier BV	European journal of medicinal chemistry	0223-5234, 1768-3254	Design of nucleotide-mimetic and non-nucleotide inhibitors of the translation initiation factor eIF4E: Synthesis, structural and functional characterisation	2824.9	TRUE	not applicable	unknown	cc-by	not applicable	hybrid	TRUE	Cancer Research UK	MRC	Wellcome Trust
PMC4973809	27524831	10.1016/j.eurpolymj.2016.06.003	Elsevier BV	European polymer journal	0014-3057, 1873-1945	Polyion complex (PIC) particles: Preparation and biomedical applications	2756.17	TRUE	not applicable	unknown	cc-by	not applicable	hybrid	TRUE	Wellcome Trust	0	0
unknown	unknown	10.1016/j.eurpolymj.2016.08.023	Elsevier BV	European Polymer Journal	0014-3057	Preparation and antimicrobial evaluation of polyion complex (PIC) nanoparticles loaded with polymyxin B	2890.39	FALSE	TRUE	not applicable	unknown	unknown	hybrid	FALSE	Wellcome Trust	EPSRC	0
PMC4926724	26572708	10.1016/j.eururo.2015.10.042	Elsevier BV	European urology	0302-2838, 1873-7560	The Early Effects of Rapid Androgen Deprivation on Human Prostate Cancer.	2257.21	TRUE	not applicable	unknown	cc-by	not applicable	hybrid	TRUE	cancer-research-uk, NIHR	0	0	1008	20406	2568
PMC4854173	26707868	10.1016/j.eururo.2015.11.030	Elsevier BV	European urology	0302-2838, 1873-7560	A randomised comparison evaluating changes in bone mineral density in advanced prostate cancer: Luteinising hormone-releasing hormone agonists versus transdermal oestradiol	2317.83	TRUE	not applicable	unknown	cc-by	not applicable	hybrid	TRUE	Cancer Research UK			MC_UU_12023/28	12443
PMC5094800	27061263	10.1016/j.eururo.2016.03.029	Elsevier BV	European urology	0302-2838, 1873-7560	Circulating folate and vitamin B12 and risk of prostate cancer: a collaborative analysis of individual participant data from six cohorts including 6875 cases and 8104 controls	2598.37	TRUE	not applicable	unknown	cc-by	not applicable	hybrid	TRUE	Cancer Research UK			19170	UM1 CA167462	U01 CA063673
unknown	26965561	10.1016/j.eururo.2016.02.055	Elsevier BV	European urology	0302-2838, 1873-7560	Prostate-specific antigen decline after 4 weeks of treatment with Aberaterone acetate & overall survival in patients with metastatic castration-resistant prostate cancer	2449.56	FALSE	FALSE	not applicable	unknown	unknown	hybrid	FALSE	Cancer Research UK
unknown	27402060	10.1016/j.eururo.2016.06.033	Elsevier BV	European urology	0302-2838, 1873-7560	Subsequent chemotherapy & treatment patterns after abirateroe acetate in patients with metastatic castration-resistant prostate cancer: post hoc analysis of COU-AA-302	2709.88	FALSE	TRUE	not applicable	unknown	unknown	hybrid	FALSE	Cancer Research UK
PMC4856733	26607713	10.1016/j.yexcr.2015.11.017	Elsevier BV	Experimental cell research	0014-4827, 1090-2422	Mechanosensitive components of integrin adhesions: Role of vinculin.	1469.33	TRUE	not applicable	unknown	cc-by	not applicable	hybrid	TRUE				1201334
PMC4829071	26968635	10.1016/j.yexcr.2016.03.004	Elsevier BV	Experimental cell research	0014-4827, 1090-2422	Allopurinol and oxypurinol promote osteoblast differentiation and increase bone formation	1539	TRUE	not applicable	unknown	cc-by	not applicable	hybrid	TRUE				19205
PMC4829071	26968635	10.1016/j.yexcr.2016.03.004	Elsevier BV	Experimental cell research	0014-4827, 1090-2422	Allopurinol and oxypurinol promote osteoblast differentiation and increase bone formation	1590.08	TRUE	not applicable	unknown	cc-by	not applicable	hybrid	TRUE				19205
PMC4948682	27321956	10.1016/j.yexcr.2016.06.008	Elsevier BV	Experimental cell research	0014-4827, 1090-2422	N-terminal nesprin-2 variants regulate ÃŸ-catenin signalling.	1731.68	TRUE	not applicable	unknown	cc-by	not applicable	hybrid	TRUE	British Heart Foundation
PMC4912010	27181226	10.1016/j.exer.2016.05.007	Elsevier BV	Experimental eye research	0014-4835, 1096-0007	Dimethylarginine dimethylaminohydrolase-2 deficiency promotes vascular regeneration and attenuates pathological angiogenesis	2196.82	TRUE	not applicable	unknown	cc-by	not applicable	hybrid	TRUE	Wellcome Trust/British Heart Foundation
PMC4974241	27235794	10.1016/j.exer.2016.05.021	Elsevier BV	Experimental eye research	0014-4835, 1096-0007	Abnormal corneal epithelial maintenance in mice heterozygous for the micropinna microphthalmia mutation Mp	2225	TRUE	not applicable	unknown	cc-by	not applicable	hybrid	TRUE	Wellcome Trust			BB/J015172/1
PMC4839985	26808046	10.1016/j.exger.2016.01.011	Elsevier BV	Experimental gerontology	0531-5565, 1873-6815	Serum folate, vitamin B-12 and cognitive function in middle and older age: The HAPIEE study	1631.9	TRUE	not applicable	unknown	cc-by	not applicable	hybrid	TRUE	Wellcome Trust			81081	64947	R01 AG23522-01
PMC4819447	26854485	10.1016/j.exphem.2015.12.006	Elsevier BV	Experimental hematology	0301-472X, 1873-2399	Expression of the MOZ-TIF2 oncoprotein in mice represses senescence.	1687.49	TRUE	not applicable	unknown	cc-by	not applicable	hybrid	TRUE				12487	unknown	unknown
PMC5019113	26988764	10.1016/j.expneurol.2016.03.009	Elsevier BV	Experimental neurology	0014-4886, 1090-2430	The multifaceted role of astrocytes in regulating myelination	2307.12	TRUE	not applicable	unknown	cc-by	not applicable	hybrid	TRUE	Medical Research Council (MRC)	Medical Research Scotland (MED-SCOT)	Wellcome Trust (WELLCOME)	MR/J004731/1
PMC5090043	27565261	10.1016/j.fertnstert.2016.08.013	Elsevier BV	Fertility and sterility	0015-0282, 1556-5653	Gay father surrogacy families: relationships with surrogates and egg donors and parental disclosure of childrenÃ¢Â€Â™s origins.	1618.08	TRUE	not applicable	unknown	cc-by	not applicable	hybrid	TRUE	wellcome-trust,
PMC4922596	27012652	10.1016/j.fertnstert.2016.02.033	Elsevier BV	Fertility and sterility	0015-0282, 1556-5653	Integrating donor conception into identity development: adolescents inÂ fatherless families.	2901.9	TRUE	not applicable	FALSE	cc-by	not applicable	hybrid	TRUE	wellcome-trust,	0	0
PMC4708624	26638695	10.1016/j.freeradbiomed.2015.11.030	Elsevier BV	Free radical biology & medicine	0891-5849, 1873-4596	The metabolism and de-bromination of bromotyrosine in vivo	1393.92	TRUE	not applicable	unknown	cc-by	not applicable	hybrid	TRUE	Wellcome Trust			075748/Z/04/Z
PMC4668279	26057936	10.1016/j.freeradbiomed.2015.05.034	Elsevier BV	Free radical biology & medicine	0891-5849, 1873-4596	Structural basis of Keap1 interactions with Nrf2	1404.24	TRUE	not applicable	unknown	cc-by	not applicable	hybrid	TRUE	Wellcome Trust			092809/Z/10/Z	106169
PMC5145801	27352979	10.1016/j.freeradbiomed.2016.06.023	Elsevier BV	Free radical biology & medicine	0891-5849, 1873-4596	PPARy as a therapeutic target to rescue mitochondrial function in neurological disease	1953.82	TRUE	not applicable	unknown	cc-by	not applicable	hybrid	TRUE	Parkinsons UK
PMC5145800	27365123	10.1016/j.freeradbiomed.2016.06.027	Elsevier BV	Free radical biology & medicine	0891-5849, 1873-4596	Adaptive regulation of the brains antioxidant defences by neurons and astroytes	1998.34	TRUE	not applicable	unknown	cc-by	not applicable	hybrid	TRUE	Wellcome Trust			G0902044	BB/D011388/1
PMC5005039	27320188	10.1016/j.freeradbiomed.2016.06.010	Elsevier BV	Free radical biology & medicine	0891-5849, 1873-4596	Reactive oxygen species facilitate the EDH response in arterioles by potentiating intracellular endothelial Ca2+ release	2094.24	TRUE	not applicable	unknown	cc-by	not applicable	hybrid	TRUE	British Heart Foundation
PMC5038933	27459418	10.1016/j.gaitpost.2016.07.012	Elsevier BV	Gait & posture	0966-6362, 1879-2219	Comparability of off the shelf foot orthoses in the redistribution of forces in midfoot osteoarthritis patients	2935.98	TRUE	not applicable	unknown	cc-by	not applicable	hybrid	TRUE	Arthritis Research UK	0	0
PMC4925380	26906256	10.1016/j.gene.2016.02.030	Elsevier BV	Gene	0378-1119, 1879-0038	A witness seminar on the history of the Human Gene Mapping Workshops.	2719.89	TRUE	not applicable	unknown	cc-by	not applicable	hybrid	TRUE
PMC4909830	27330998	10.1016/j.gdata.2016.05.012	Elsevier BV	Genomics data	2213-5960	Identification of polymorphic and off-target probe binding sites on the Illumina Infinium MethylationEPIC BeadChip	359.13	TRUE	not applicable	unknown	cc-by	not applicable	oa	TRUE	Wellcome Trust			104036	G0700704
PMC4838671	27102029	10.1016/j.gheart.2015.12.005	Elsevier BV	Global heart	2211-8160, 2211-8179	The Relationship Between Socioeconomic Status and CV Risk Factors: The CRONICAS Cohort Study of PeruvianAdults.	2337.34	TRUE	not applicable	FALSE	non-standard-licence	unknown	hybrid	FALSE	Wellcome Trust			103994/Z/14/Z	098504/Z/12/Z	HHSN268200900033C
PMC4676191	26457624	10.1016/j.healthplace.2015.09.004	Elsevier BV	Health & place	1353-8292, 1873-2054	Healthy urban environments for children and young people: A systematic review of intervention studies	1407.22	TRUE	not applicable	unknown	cc-by	not applicable	hybrid	TRUE	MRC	ESRC	Wellcome Trust	MR/K023233/1
PMC4889783	26922515	10.1016/j.healthplace.2016.02.007	Elsevier BV	Health & place	1353-8292, 1873-2054	Walking groups in socioeconomically deprived communities: A qualitative study using photo elicitation.	1494.13	TRUE	not applicable	FALSE	cc-by	not applicable	hybrid	TRUE	british-heart-foundation, cancer-research-uk, esrc, mrc, nihr, wellcome-trust,	0	0	MR/K023187/1
	26974232	10.1016/j.healthplace.2016.03.001	Elsevier BV	Health & place	1353-8292, 1873-2054	Gamification of active travel to school: A pilot evaluation of the Beat the Street physical activity intervention.	1616.77	FALSE	FALSE	not applicable	unknown	unknown	hybrid	FALSE	british-heart-foundation, cancer-research-uk, esrc, mrc, nihr, wellcome-trust,	0	0
	26922516	10.1016/j.healthplace.2016.02.004	Elsevier BV	Health & place	1353-8292, 1873-2054	School grounds and physical activity: Associations at secondary schools, and over the transition from primary to secondary schools.	1497.15	FALSE	FALSE	not applicable	unknown	unknown	hybrid	FALSE	british-heart-foundation, cancer-research-uk, esrc, mrc, nihr, wellcome-trust,	0	0
PMC5090052	27498399	10.1016/j.heares.2016.07.017	Elsevier BV	Hearing research	0378-5955, 1878-5891	Vestibular-dependent inter-stimulus interval effects on sound evoked potentials of central origin.	1956.98	TRUE	not applicable	unknown	cc-by	not applicable	hybrid	TRUE
	27235812	10.1016/j.yhbeh.2016.05.016	Elsevier BV	Hormones and behavior	0018-506X, 1095-6867	Comparison of clear and narrow outcomes on testosterone levels in social competition.	1955.81	FALSE	TRUE	not applicable	unknown	unknown	hybrid	FALSE	mrc, wellcome-trust,	0	0
PMC4504024	26047922	10.1016/j.immuni.2015.05.010	Elsevier BV	Immunity	1074-7613, 1097-4180	Leukotriene B4-Neutrophil Elastase Axis Drives Neutrophil Reverse Transendothelial Cell Migration In Vivo.	3194.27	TRUE	not applicable	unknown	cc-by	not applicable	hybrid	TRUE				098291/Z/12/Z	98291
PMC4803914	26968426	10.1016/j.immuni.2016.02.012	Elsevier BV	Immunity	1074-7613, 1097-4180	A regulatory feedback between plasmacytoid dendritic cellsÂ…	3445.23	TRUE	not applicable	unknown	cc-by	not applicable	hybrid	TRUE	Wellcome Trust			090406/Z/09/Z
PMC4846977	27067058	10.1016/j.immuni.2016.03.003	Elsevier BV	Immunity	1074-7613, 1097-4180	Cystatin F Ensures Eosinophil Survival by Regulating Granule Biogenesis	3560.52	TRUE	not applicable	unknown	cc-by	not applicable	hybrid	TRUE	Wellcome Trust			unknown
PMC4658339	26588780	10.1016/j.immuni.2015.10.012	Elsevier BV	Immunity	1074-7613, 1097-4180	Pulmonary Epithelial Cell-Derived Cytokine TGF-b1 Is a Critical Cofactor for Enhanced Innate Lymphoid Cell Function	3830.39	TRUE	not applicable	unknown	cc-by	not applicable	hybrid	TRUE				087618/Z/08/Z
PMC4678289	26084025	10.1016/j.immuni.2015.05.015	Elsevier BV	Immunity	1074-7613, 1097-4180	Artery tertiary lymphoid organs control aorta immunity and protect against atherosclerosis via vascular smooth muscle cell lymphotoxin ÃŽÂ² receptors	3901.81	TRUE	not applicable	unknown	cc-by	not applicable	hybrid	TRUE	British Heart Foundation (BHF)	British Heart Foundation (BHF)		104111	PG/12/81/29897	PG/06/083/21198
PMC5040828	27566939	10.1016/j.immuni.2016.07.022	Elsevier BV	Immunity	1074-7613, 1097-4180	Phosphoproteomic Analyses of Interleukin 2 Signaling Reveal Integrated JAK Kinase-Dependent and -Independent Networks in CD8+Â T Cells	3923.84	TRUE	not applicable	unknown	cc-by	not applicable	hybrid	TRUE	Wellcome Trust
PMC4760122	26885856	10.1016/j.immuni.2016.01.018	Elsevier BV	Immunity	1074-7613, 1097-4180	Glycogen Synthase Kinase 3 Inactivation Drives T-bet-Mediated Downregulation of Co-receptor PD-1 to Enhance CD8(+) Cytolytic T Cell Responses.	4117.2	TRUE	not applicable	FALSE	cc-by	not applicable	hybrid	TRUE	wellcome,	0	0	092627/Z/10/Z	R01 AI081923	AI081923
PMC4731778	26688508	10.1016/j.imbio.2015.11.013	Elsevier BV	Immunobiology	0171-2985, 1878-3279	Interleukin-33 promoting Th1 lymphocyte differentiation dependents on IL-12	1593.48	TRUE	not applicable	unknown	cc-by	not applicable	hybrid	TRUE	Arthritis Research UK (ARC)			unknown
PMC4860717	26905930	10.1016/j.imlet.2016.02.004	Elsevier BV	Immunology letters	0165-2478, 1879-0542	Non-cleavable talin rescues defect in the T-cell conjugation of T-cells deficient in the immune adaptor SKAP1.	2106.14	TRUE	not applicable	FALSE	cc-by	not applicable	hybrid	TRUE	wellcome, CRUK	0	0
PMC4666899	26192376	10.1016/j.meegid.2015.07.020	Elsevier BV	Infection, genetics and evolution : journal of molecular epidemiology and evolutionary genetics in infectious diseases	1567-1348, 1567-7257	The incidence rate over 10 years of naturally occurring, cancer related mutations in the basal core promoter of hepatitis B virus	1665.78	TRUE	not applicable	unknown	cc-by	not applicable	hybrid	TRUE	Wellcome Trust			WT072058MA
PMC4760273	26803520	10.1016/j.intimp.2016.01.003	Elsevier BV	International immunopharmacology	1567-5769, 1878-1705	The role of the Annexin-A1/FPR2 system in the regulation of mast cell degranulation provoked by compound 48/80 and in the inhibitory action of nedocromil.	2657.59	TRUE	not applicable	unknown	cc-by	not applicable	hybrid	TRUE				85903
PMC4907315	27168056	10.1016/j.intimp.2016.04.028	Elsevier BV	International immunopharmacology	1567-5769, 1878-1705	Pharmacological inhibition of PI3K class III enhances the production of pro- and anti-inflammatory cytokines in dendritic cells stimulated by TLR agonists.	2751.41	TRUE	not applicable	unknown	cc-by	not applicable	hybrid	TRUE
PMC4722067	26215058	10.1016/j.ijpara.2015.06.004	Elsevier BV	International journal for parasitology	0020-7519, 1879-0135	Leishmania major UDP-sugar pyrophosphorylase salvages galactose for glycoconjugate biosynthesis.	1855.91	TRUE	not applicable	unknown	cc-by	not applicable	hybrid	TRUE	Wellcome Trust			101842
PMC4776704	26688390	10.1016/j.ijpara.2015.10.004	Elsevier BV	International journal for parasitology	0020-7519, 1879-0135	Novel O-linked methylated glycan antigens decorate secreted immunodominant glycoproteins from the intestinal nematode Heligmosomoides polygyrus	2054.84	TRUE	not applicable	unknown	cc-by	not applicable	hybrid	TRUE	Wellcome Trust			106122	90281	U54 GM062116
PMC4900130	27156058	10.1016/j.ijcard.2016.04.130	Elsevier BV	International journal of cardiology	0167-5273, 1874-1754	Telomere length, antioxidant status and incidence of ischaemic heart disease in type 2 diabetes	2326.48	TRUE	not applicable	unknown	cc-by	not applicable	hybrid	TRUE	British Heart Foundation
PMC4917887	27240151	10.1016/j.ijcard.2016.05.012	Elsevier BV	International journal of cardiology	0167-5273, 1874-1754	Effect of cold spells and their modifiers on cardiovascular disease events: Evidence from two prospective studies	2682.95	TRUE	not applicable	unknown	cc-by	not applicable	hybrid	TRUE	British Heart Foundation
PMC4994770	27390994	10.1016/j.ijcard.2016.06.249	Elsevier BV	International journal of cardiology	0167-5273, 1874-1754	Post-operative atrial fibrillation is associated with a pre-existing structural and electrical substrate in human right atrial myocardium	2968.31	TRUE	not applicable	unknown	cc-by	not applicable	hybrid	TRUE				FS/14/46/30907
PMC5073997	27543698	10.1016/j.ijcard.2016.07.252	Elsevier BV	International journal of cardiology	0167-5273, 1874-1754	Normal age-related changes in left ventricular function: Role of afterload and subendocardial dysfunction	3829.3	TRUE	not applicable	unknown	cc-by	not applicable	hybrid	TRUE	British Heart Foundation
PMC4691930	26753174	10.1016/j.ijcha.2015.06.009	Elsevier BV	International journal of cardiology. Heart & vasculature	2352-9067	Risk stratification in non-ST elevation acute coronary syndromes: risk scores, biomarkers and clinical judgment	1964.58	TRUE	not applicable	unknown	cc-by	not applicable	oa	TRUE	British Heart Foundation (BHF)			PG/11/55/28999
PMC5111480	27882341	10.1016/j.ijcha.2016.03.005	Elsevier BV	International journal of cardiology. Heart & vasculature	2352-9067	Using MRI to predict future adverse cardiac remodelling in a male mouse model of myocardial infarction	2128.87	TRUE	not applicable	unknown	cc-by	not applicable	oa	TRUE	British Heart Foundation
PMC4970655	27252152	10.1016/j.ijheh.2016.05.004	Elsevier BV	International journal of hygiene and environmental health	1438-4639, 1618-131X	Blood mercury levels and fish consumption in pregnancy: risks and benefits for birth outcomes in a prospective observational birth cohort	2059.72	TRUE	not applicable	unknown	cc-by	not applicable	hybrid	TRUE	MRC	Wellcome Trust		102215	MC_PC_15018
PMC4899821	27062108	10.1016/j.ijlp.2016.02.029	Elsevier BV	International journal of law and psychiatry	0160-2527, 1873-6386	Tensions between policy and practice: A qualitative analysis of decisions regarding compulsory admission to psychiatric hospital.	1492.4	TRUE	not applicable	FALSE	cc-by	not applicable	hybrid	TRUE	wellcome-trust, nihr	0	0
PMC4838670	27084641	10.1016/j.ijrobp.2016.01.044	Elsevier BV	International journal of radiation oncology, biology, physics	0360-3016, 1879-355X	An Analysis of Plan Robustness for Esophageal Tumors: Comparing Volumetric Modulated Arc Therapy Plans and Spot Scanning Proton Planning	2108.18	TRUE	not applicable	unknown	cc-by	not applicable	hybrid	TRUE	Cancer Research UK	MRC		16049	MC_PC_12001/2	C5255/A15935
unknown	27026308	10.1016/j.ijrobp.2015.12.379	Elsevier BV	International journal of radiation oncology, biology, physics	0360-3016, 1879-355X	Prospective study delivering simulataneous integrated high-dose tumor-boost (<70Gy) with image guided adaptive radiation therapy for radical treatment of localized muscle-invasive bladder cancer	1707.75	FALSE	FALSE	not applicable	unknown	unknown	hybrid	FALSE	Cancer Research UK			unknown
PMC5063532	27766316	10.1016/j.jacbts.2016.06.004	Elsevier BV	JACC. Basic to translational science	2452-302X	Unilateral carotid body resection in resistant hypertension: a safety and feasibility trial	2920.63	TRUE	not applicable	unknown	cc-by	not applicable	hybrid	TRUE	British Heart Foundation			R01 AT008632
PMC5056585	27639759	10.1016/j.jcmg.2016.04.007	Elsevier BV	JACC. Cardiovascular imaging	1936-878X, 1876-7591	Thresholds for Arterial Wall Inflammation Quantified by 18F-Fluorodeoxyglucose Positron Emission Tomographic Imaging - Implications for Vascular Interventional Studies	2760.4	TRUE	not applicable	unknown	cc-by	not applicable	hybrid	TRUE	british-heart-foundation, nihr, wellcome-trust, fp7
PMC4708879	26684978	10.1016/j.jcmg.2015.08.018	Elsevier BV	JACC. Cardiovascular imaging	1936-878X, 1876-7591	Endothelial cell tetrahydrobiopterin deficiency attenuates LPS-induced vascular dysfunction and hypotension	1905.28	TRUE	not applicable	FALSE	non-standard-licence	unknown	hybrid	FALSE	British Heart Foundation	British Heart Foundation		FS/15/11/31233	unknown	NF-SI-0512-10005
PMC4639392	26476505	10.1016/j.jcmg.2015.08.007	Elsevier BV	JACC. Cardiovascular imaging	1936-878X, 1876-7591	Precursors of the hypertensive heart phenotype develop in normotensive adults: a high resolution 3D MRI study	2308.74	TRUE	not applicable	FALSE	non-standard-licence	unknown	hybrid	FALSE				unknown	1115	EP/K030523/1
PMC5196018	28066827	10.1016/j.jacep.2016.04.006	Elsevier BV	JACC. Clinical electrophysiology	2405-500X, 2405-5018	Optimised left ventricular endocardial stimulation is superior to optimised epicardial stimulation in ischemic patients with poor CRT response: a combined magnetic resonance imaging, electro-anatomical contact mapping and hemodynamic study to target endocardial lead placement.	2443.65	TRUE	not applicable	unknown	cc-by	not applicable	hybrid	TRUE	Wellcome Trust
PMC5076465	27807593	10.1016/j.jacep.2016.03.007	Elsevier BV	JACC. Clinical electrophysiology	2405-500X, 2405-5018	Enhancement of Gap Junction Function During Acute Myocardial Infarction Modifies Healing and Reduces Late Ventricular Arrhythmia Susceptibility	2547.48	TRUE	not applicable	unknown	cc-by	not applicable	hybrid	TRUE				RG/10/11/28457	FS/11/67/28954
unknown	25454393	10.1016/j.jchf.2014.07.012	Elsevier BV	JACC. Heart failure	2213-1779, 2213-1787	An increased B-type natriuretic peptide in the absence of a cardiac abnormality identifies those whose left ventricular mass will increase over time	2191.38	FALSE	FALSE	not applicable	unknown	unknown	hybrid	FALSE	British Heart Foundation			unknown
unknown	unknown	10.1016/j.jacep.2016.04.009	Elsevier BV	JACC: Clinical Electrophysiology	2405-500X	A cost effectiveness analysis of quadripolar versus bipolar left ventricular leads for cardiac resynchronization defibrillator therapy in a large multi-centre UK registry.	2443.46	FALSE	TRUE	not applicable	unknown	unknown	hybrid	FALSE	British Heart Foundation
PMC4679114	26544620	10.1016/j.jad.2015.09.004	Elsevier BV	Journal of affective disorders	0165-0327, 1573-2517	A comparative cross-cultural study of the prevalence of late life depression in low and middle income countries	970.7	TRUE	not applicable	unknown	cc-by	not applicable	hybrid	TRUE	Wellcome Trust			GR066133	MR/K021907/1
PMC4459713	25983304	10.1016/j.jad.2015.04.021	Elsevier BV	Journal of affective disorders	0165-0327, 1573-2517	Verbal learning impairment in euthymic bipolar disorder: BDI v BDII	1934.91	TRUE	not applicable	unknown	cc-by	not applicable	hybrid	TRUE	Wellcome Trust			102616/Z	RP-PG-0108-10087
PMC4650986	26469300	10.1016/j.jad.2015.09.039	Elsevier BV	Journal of affective disorders	0165-0327, 1573-2517	Are female children more vulnerable to the long-term effects of maternal depression during pregnancy?	1954.48	TRUE	not applicable	unknown	cc-by	not applicable	hybrid	TRUE	MRC	Wellcome Trust		102215	92731	unknown
PMC4595479	26301478	10.1016/j.jad.2015.08.012	Elsevier BV	Journal of affective disorders	0165-0327, 1573-2517	Associations of maternal and paternal antenatal mood with offspring anxiety disorder at age 18 years	1989.14	TRUE	not applicable	unknown	cc-by	not applicable	hybrid	TRUE	Wellcome Trust			102215	92731	MC_PC_15018
PMC4906149	27136417	10.1016/j.jad.2016.04.048	Elsevier BV	Journal of affective disorders	0165-0327, 1573-2517	Gestational influenza and risk of hypomania in young adulthood: prospective birth cohort study	2470.7	TRUE	not applicable	unknown	cc-by	not applicable	hybrid	TRUE				102215	MC_PC_15018
PMC5296237	27449555	10.1016/j.jad.2016.06.065	Elsevier BV	Journal of affective disorders	0165-0327, 1573-2517	Daily longitudinal self-monitoring of mood variability in bipolar disorder and borderline personality disorder	1371.45	TRUE	FALSE	FALSE	cc-by	unknown	hybrid	TRUE	Wellcome Trust	EPSRC
PMC4803023	26778835	10.1016/j.jaut.2015.12.004	Elsevier BV	Journal of autoimmunity	0896-8411, 1095-9157	Sonic Hedgehog regulates thymic epithelial cell differentiation	2104.8	TRUE	not applicable	unknown	cc-by	not applicable	hybrid	TRUE	Wellcome Trust	MRC/BBSRC		unknown	1212180	1342014
PMC4871811	27036372	10.1016/j.jaut.2016.03.009	Elsevier BV	Journal of autoimmunity	0896-8411, 1095-9157	Non-conventional forms of HLA-B27 are expressed in Spondyloarthritis joints and gut tissue	2814.9	TRUE	not applicable	unknown	cc-by	not applicable	hybrid	TRUE	Arthritis Research UK			19611
PMC4803021	26873648	10.1016/j.jaut.2016.01.001	Elsevier BV	Journal of autoimmunity	0896-8411, 1095-9157	Intestinal CCL25 expression is increased in colitis and correlates with inflammatory activity	2829.09	TRUE	not applicable	unknown	cc-by	not applicable	hybrid	TRUE	Wellcome Trust	0	0	099907/Z/12/Z	NF-SI-0512-10080
PMC4655867	26472305	10.1016/j.jbiomech.2015.09.023	Elsevier BV	Journal of biomechanics	0021-9290, 1873-2380	The influence of constitutive law choice used to characterise atherosclerotic tissue material properties on computing stress values in human carotid plaques.	2302.01	TRUE	not applicable	unknown	cc-by	not applicable	hybrid	TRUE	british-heart-foundation, Heart Research UK	0	0	PG/11/74/29100
PMC4655836	26429769	10.1016/j.jbiomech.2015.09.002	Elsevier BV	Journal of biomechanics	0021-9290, 1873-2380	The envelope of passive motion allowed by the capsular ligaments of the hip	2359.19	TRUE	not applicable	unknown	cc-by	not applicable	hybrid	TRUE				088844/Z/09/Z	unknown	EP/K027549/1
PMC4655866	26472304	10.1016/j.jbiomech.2015.09.037	Elsevier BV	Journal of biomechanics	0021-9290, 1873-2380	A uni-extension study on the ultimate material strength and extreme extensibility of atherosclerotic tissue in human carotid plaques.	2382.04	TRUE	not applicable	unknown	cc-by	not applicable	hybrid	TRUE	british-heart-foundation, Heart Research UK, National Natural Science Foundation of China, and NIHR BRC	0	0	PG/11/74/29100
PMC5038162	27040388	10.1016/j.jbiomech.2016.03.009	Elsevier BV	Journal of biomechanics	0021-9290, 1873-2380	Study of cardiovascular function using a coupled left ventricle and systemic circulation model	2720.1	TRUE	not applicable	unknown	cc-by	not applicable	hybrid	TRUE	British Heart Foundation (BHF)	British Heart Foundation (BHF)		EP/N014642/1	PG/14/64/31043	PG/11/2/28474
PMC5038160	27059259	10.1016/j.jbiomech.2016.03.036	Elsevier BV	Journal of biomechanics	0021-9290, 1873-2380	Impact of different aortic valve calcification patterns on the outcome of transcatheter valve implantation: a finite element study	2740.98	TRUE	not applicable	unknown	cc-by	not applicable	hybrid	TRUE	Wellcome Trust/British Heart Foundation
PMC4894247	27048984	10.1016/j.jbiomech.2016.03.035	Elsevier BV	Journal of biomechanics	0021-9290, 1873-2380	The centre of rotation of the shoulder complex and the effect of normalisation	2759.77	TRUE	not applicable	unknown	cc-by	not applicable	hybrid	TRUE
PMC5061069	27282961	10.1016/j.jbiomech.2016.05.027	Elsevier BV	Journal of biomechanics	0021-9290, 1873-2380	Physiological vortices in the sinuses of Valsalva: an in vitro approach for bio-prosthetic valves	2761.64	TRUE	not applicable	unknown	cc-by	not applicable	hybrid	TRUE	British Heart Foundation/Wellcome Trust
PMC5061070	27448497	10.1016/j.jbiomech.2016.07.001	Elsevier BV	Journal of biomechanics	0021-9290, 1873-2380	Control of a wrist joint motion simulator: a phantom study	2968.31	TRUE	not applicable	unknown	cc-by	not applicable	hybrid	TRUE				20556
unknown	27395759	10.1016/j.jbiomech.2016.06.021	Elsevier BV	Journal of biomechanics	0021-9290, 1873-2380	Can finite element models of ballooning procedures yield mechanical response of the cardiovascular site to overexpansion?	2517.51	FALSE	FALSE	not applicable	unknown	unknown	hybrid	FALSE	British Heart Foundation	EPSRC
PMC4922622	26776084	10.1016/j.jclinepi.2016.01.005	Elsevier BV	Journal of clinical epidemiology	0895-4356, 1878-5921	Improved incidence estimates from linked versus stand-along electronic health records.	2008.11	TRUE	not applicable	unknown	cc-by	not applicable	hybrid	TRUE	Wellcome Trust			G0902135	NF-SI-0510-10090	MR/K006584/1
PMC5152936	27343981	10.1016/j.jclinepi.2016.06.005	Elsevier BV	Journal of clinical epidemiology	0895-4356, 1878-5921	The reporting of studies using routinely collected health data was often insufficient.	2266.99	TRUE	not applicable	unknown	cc-by	not applicable	hybrid	TRUE	Wellcome Trust
PMC4710576	26655269	10.1016/j.jcv.2015.11.036	Elsevier BV	Journal of clinical virology : the official publication of the Pan American Society for Clinical Virology	1386-6532, 1873-5967	Detection of influenza C virus but not influenza D virus in Scottish respiratory samples	2234.9	TRUE	not applicable	unknown	cc-by	not applicable	hybrid	TRUE	Wellcome Trust			095831/Z/11/Z	BBS/E/D/20241864	BB/J004324/1
PMC4994427	27498250	10.1016/j.jcv.2016.06.015	Elsevier BV	Journal of clinical virology : the official publication of the Pan American Society for Clinical Virology	1386-6532, 1873-5967	A comparison of different human papillomavirus tests in PreservCyt versus SurePath in a referral population-PREDICTORS 4.	2735.28	TRUE	not applicable	unknown	cc-by	not applicable	hybrid	TRUE
PMC4896117	27330221	10.1016/j.jcp.2015.12.038	Elsevier BV	Journal of computational physics	0021-9991	A Computational Method for the Coupled Solution of Reaction-Diffusion Equations on Evolving Domains and Manifolds: Application to a Model of Cell Migration and Chemotaxis	1425.48	TRUE	not applicable	unknown	cc-by	not applicable	hybrid	TRUE	EPSRC	Cancer Research UK		15672
PMC5154339	27375092	10.1016/j.jcf.2016.06.008	Elsevier BV	Journal of cystic fibrosis : official journal of the European Cystic Fibrosis Society	1569-1993, 1873-5010	IL-22 exacerbates weight loss in a murine model of chronic pulmonary Pseudomonas aeruginosa infection	2604.73	TRUE	not applicable	unknown	cc-by	not applicable	hybrid	TRUE	Wellcome Trust (WELLCOME)
PMC5104689	27427436	10.1016/j.jdermsci.2016.06.008	Elsevier BV	Journal of dermatological science	0923-1811, 1873-569X	Galectin-6 is a novel skin anti-microbial peptide that is modulated by the skin barrier and microbiome	2215.89	TRUE	not applicable	FALSE	cc-by-nc-nd	unknown	hybrid	FALSE	Wellcome Trust
PMC4834630	27110036	10.1016/j.jfluchem.2016.02.008	Elsevier BV	Journal of fluorine chemistry	0022-1139	A Bisphosphonate for 19F-Magnetic Resonance Imaging	1097.56	TRUE	not applicable	unknown	cc-by	not applicable	hybrid	TRUE	Wellcome Trust
PMC4770870	26614692	10.1016/j.jhealeco.2015.10.007	Elsevier BV	Journal of health economics	0167-6296, 1879-1646	Genetic Markers as Instrumental Variables	1367.28	TRUE	not applicable	unknown	cc-by	not applicable	hybrid	TRUE	MRC	Wellcome Trust	ESRC	102215	269874	ES/H005803/1
PMC4876170	26795831	10.1016/j.jhep.2016.01.003	Elsevier BV	Journal of hepatology	0168-8278, 1600-0641	Multivariate metabotyping of plasma accurately predicts survival in decompensated cirrhosis	2512.23	TRUE	not applicable	unknown	cc-by	not applicable	hybrid	TRUE				90542	MR/K010514/1	MR/J006742/1
PMC4783706	26826277	10.1016/j.jim.2016.01.014	Elsevier BV	Journal of immunological methods	0022-1759, 1872-7905	T-cell libraries allow simple parallel generation of multiple peptide-specific human T-cell clones	2787.63	TRUE	not applicable	unknown	cc-by	not applicable	hybrid	TRUE	Wellcome Trust	0	0	1247762
PMC4859332	26966045	10.1016/j.jim.2016.02.023	Elsevier BV	Journal of immunological methods	0022-1759, 1872-7905	Comparative genomics analysis of mononuclear phagocyte subsets confirms homology between lymphoid tissue-resident and dermal XCR1+ DCs in mouse and human and distinguishes them from Langerhans cells	2806.97	TRUE	not applicable	unknown	cc-by	not applicable	hybrid	TRUE	Wellcome Trust
PMC4965358	27208416	10.1016/j.jmr.2016.05.007	Elsevier BV	Journal of magnetic resonance (San Diego, Calif. : 1997)	1090-7807, 1096-0856	Diffusion-mediated nuclear spin phase decoherence in cylindrically porous materials	2526.14	TRUE	not applicable	unknown	cc-by	not applicable	hybrid	TRUE	Wellcome Trust
PMC4838658	27030640	10.1016/j.mimet.2016.03.015	Elsevier BV	Journal of microbiological methods	0167-7012, 1872-8359	Modification of the classical Lancefield assay of group A streptococcal killing to reduce inter donor variation	2759.77	TRUE	not applicable	unknown	cc-by	not applicable	hybrid	TRUE				G0800777
PMC4640586	26341255	10.1016/j.yjmcc.2015.08.017	Elsevier BV	Journal of molecular and cellular cardiology	0022-2828, 1095-8584	The structural and functional effects of the Familial Hypertrophic Cardiomyopathy-linked cardiac troponin C mutation, L29Q	692.29	TRUE	not applicable	unknown	cc-by	not applicable	hybrid	TRUE	British Heart Foundation			37769	FS/09/001/26329	PG/12/52/29713
PMC4915816	26546827	10.1016/j.yjmcc.2015.10.026	Elsevier BV	Journal of molecular and cellular cardiology	0022-2828, 1095-8584	The relative role of patient physiology and device optimisation in cardiac resynchronisation therapy: A computational modelling study	717.22	TRUE	not applicable	unknown	cc-by	not applicable	hybrid	TRUE	Wellcome Trust			99973	PG/11/101/29212	EP/M012492/1
PMC4831045	26853943	10.1016/j.yjmcc.2016.02.003	Elsevier BV	Journal of molecular and cellular cardiology	0022-2828, 1095-8584	Probing the mechanism of cardiovascular drugs using a covalent levosimendan analog	777.38	TRUE	not applicable	unknown	cc-by	not applicable	hybrid	TRUE	British Heart Foundation			37769	FS/09/001/26329	PG/12/52/29713
PMC5080448	27291063	10.1016/j.yjmcc.2016.06.006	Elsevier BV	Journal of molecular and cellular cardiology	0022-2828, 1095-8584	Tbx18 and the generation of a biological pacemaker. Are we there yet?	966.95	TRUE	not applicable	unknown	cc-by	not applicable	hybrid	TRUE				MR/J010383/1	PG/14/83/31128	PG/14/46/30911
PMC4945757	26578393	10.1016/j.yjmcc.2015.11.005	Elsevier BV	Journal of molecular and cellular cardiology	0022-2828, 1095-8584	Aging and the cardiac collagen matrix: Novel mediators of fibrotic remodelling.	1381.4	TRUE	not applicable	unknown	cc-by	not applicable	hybrid	TRUE				FS/12/57/29717
PMC4727789	26625714	10.1016/j.yjmcc.2015.11.024	Elsevier BV	Journal of molecular and cellular cardiology	0022-2828, 1095-8584	The Hippo pathway mediates inhibition of vascular smooth muscle cell proliferation by cAMP	1481.23	TRUE	not applicable	unknown	cc-by	not applicable	hybrid	TRUE	British Heart Foundation			PG/14/82/31126
PMC4915860	26611884	10.1016/j.yjmcc.2015.11.018	Elsevier BV	Journal of molecular and cellular cardiology	0022-2828, 1095-8584	Uncertainty and variability in models of the cardiac action potential: Can we build trustworthy models?	1518.23	TRUE	not applicable	unknown	cc-by	not applicable	hybrid	TRUE	Wellcome Trust			101222	1366641	NC/K001337/1
PMC4796039	26827899	10.1016/j.yjmcc.2016.01.026	Elsevier BV	Journal of molecular and cellular cardiology	0022-2828, 1095-8584	Young at heart: Regenerative potential linked to immature cardiac phenotypes	1522.96	TRUE	not applicable	unknown	cc-by	not applicable	hybrid	TRUE	British Heart Foundation			FS/11/29/28759	FS/13/18/30207	PG/13/19/30059
PMC5007024	27132017	10.1016/j.yjmcc.2016.04.014	Elsevier BV	Journal of molecular and cellular cardiology	0022-2828, 1095-8584	Characterization and influence of cardiac background sodium current in the atrioventricular node	1606.57	TRUE	not applicable	unknown	cc-by	not applicable	hybrid	TRUE	British Heart Foundation			RG/11/18/29257
PMC4751978	26608810	10.1016/j.jmb.2015.11.014	Elsevier BV	Journal of molecular biology	0022-2836, 1089-8638	Direct Evidence for Packaging Signal-Mediated Assembly of Bacteriophage MS2	1502.98	TRUE	not applicable	unknown	cc-by	not applicable	hybrid	TRUE	Wellcome Trust	0	0	090932/Z/09/Z	089311/Z/09/Z	078113/Z/05/Z
PMC5055082	26284972	10.1016/j.jmb.2015.08.008	Elsevier BV	Journal of molecular biology	0022-2836, 1089-8638	The Evolution of Aggregative Multicellularity and Cell-Cell Communication in the Dictyostelia	1512.43	TRUE	not applicable	unknown	cc-by	not applicable	hybrid	TRUE	Wellcome Trust			100293/Z/12/Z	100293	BB/K000799/1
PMC4773402	26780548	10.1016/j.jmb.2016.01.009	Elsevier BV	Journal of molecular biology	0022-2836, 1089-8638	Comparison of the aggregation of homologous ?2-microglobulin variants reveals protein solubility as a key determinant of amyloid formation	1586.56	TRUE	not applicable	unknown	cc-by	not applicable	hybrid	TRUE	Wellcome Trust	0	0	92896	094232/Z/10/Z	090932/Z/09/Z
PMC4773401	26804569	10.1016/j.jmb.2016.01.013	Elsevier BV	Journal of molecular biology	0022-2836, 1089-8638	Structures of the DfsB protein family suggest a cationic, helical sibling-lethal factor peptide	1593.2	TRUE	not applicable	unknown	cc-by	not applicable	hybrid	TRUE				100280	104833
PMC4906157	27067110	10.1016/j.jmb.2016.04.003	Elsevier BV	Journal of molecular biology	0022-2836, 1089-8638	Zooming in on Transcription Initiation	1606.57	TRUE	not applicable	unknown	cc-by	not applicable	hybrid	TRUE	Wellcome Trust
PMC4942838	27117189	10.1016/j.jmb.2016.04.025	Elsevier BV	Journal of molecular biology	0022-2836, 1089-8638	The Nucleosome Remodeling and Deacetylase Complex NuRD Is Built from Preformed Catalytically Active Sub-modules.	1819.35	TRUE	not applicable	FALSE	cc-by	not applicable	hybrid	TRUE	mrc, wellcome-trust, European Commission FP7	0	0	98021	MR/M010082/1
PMC5053324	27515396	10.1016/j.jmb.2016.08.004	Elsevier BV	Journal of molecular biology	0022-2836, 1089-8638	The Xp10 bacteriophage protein P7 inhibits transcription by the major and major variant forms of the host RNA polymerase via a common mechanism	1959.96	TRUE	not applicable	unknown	cc-by	not applicable	hybrid	TRUE
PMC4744555	26730886	10.1016/j.jmb.2015.12.018	Elsevier BV	Journal of molecular biology	0022-2836, 1089-8638	P(I) Release Limits the Intrinsic and RNA-Stimulated ATPase Cycles of DEAD-Box Protein 5 (Dbp5).	1614.64	TRUE	FALSE	FALSE	cc-by	unknown	hybrid	TRUE	nih, nsf, wellcome-trust, Alberta Innovates Health Solutions Postdoctoral Fellowship, Canada Foundation for Innovation, Canada Research Chairs program, Government of Alberta Research Capacity Program, Natural Sciences and Engineering Research Council of Canada	0	0	101908/Z/13/Z	101908	R01 GM102869
PMC4751974	26655848	10.1016/j.jmb.2015.11.022	Elsevier BV	Journal of molecular biology	0022-2836, 1089-8638	Deriving Heterospecific Self-assembling Protein-Protein Interactions Using a Computational Interactome Screen	1463.9	TRUE	not applicable	FALSE	cc-by-nc-nd	unknown	hybrid	FALSE	Cancer Research UK			11738	1603074	H-1001
PMC5061560	26522935	10.1016/j.jmb.2015.09.026	Elsevier BV	Journal of molecular biology	0022-2836, 1089-8638	The Kink Turn, a Key Architectural Element in RNA Structure	1635.84	TRUE	not applicable	FALSE	cc-by-nc-nd	unknown	hybrid	FALSE	Cancer Research UK			unknown
PMC4641244	26362007	10.1016/j.jmb.2015.08.018	Elsevier BV	Journal of molecular biology	0022-2836, 1089-8638	Three-dimensional structure of vertebrate muscle Z-band: the small-square lattice Z-band in rat cardiac muscle	1420.69	TRUE	not applicable	FALSE	cc-by-nc-nd	unknown	hybrid	FALSE				RG/11/21/29335
PMC4920644	27721520	10.1016/j.molstruc.2016.04.077	Elsevier BV	Journal of molecular structure	0022-2860, 1872-8014	Crystal structure resolution of two different chlorhexidine salts	1079.35	TRUE	not applicable	unknown	cc-by	not applicable	hybrid	TRUE	British Heart Foundation	EPSRC	0	NH/11/8/29253	EP/K005499/1
PMC4758829	26698227	10.1016/j.jneumeth.2015.11.029	Elsevier BV	Journal of neuroscience methods	0165-0270, 1872-678X	Analysis of simultaneous MEG and intercranial LFP recordings during Deep Brain Stimulation: a protocol and experimental validation	1515.48	TRUE	not applicable	unknown	cc-by	not applicable	hybrid	TRUE	Wellcome Trust	MRC		91593	F-0903	MR/K005464/1
PMC4758824	26692030	10.1016/j.jneumeth.2015.11.028	Elsevier BV	Journal of neuroscience methods	0165-0270, 1872-678X	Decoding intracranial EEG data with multiple kernel learning method	1577.87	TRUE	not applicable	unknown	cc-by	not applicable	hybrid	TRUE	Wellcome Trust			WT086565/Z/08/Z	WT102845/Z/13/Z	102845
PMC5012894	27353722	10.1016/j.jneumeth.2016.06.011	Elsevier BV	Journal of neuroscience methods	0165-0270, 1872-678X	A multiple hold-out framework for Sparse Partial Least Squares	1608.51	TRUE	not applicable	unknown	cc-by	not applicable	hybrid	TRUE	Wellcome Trust			U01 AG024904
PMC4935671	27189889	10.1016/j.jneumeth.2016.05.009	Elsevier BV	Journal of neuroscience methods	0165-0270, 1872-678X	Individually customisable non-invasive head immobilisation system for non-human primates with an option for voluntary engagement	1643.62	TRUE	not applicable	unknown	cc-by	not applicable	hybrid	TRUE	Wellcome Trust			BB/J009849/1
PMC4994768	27268156	10.1016/j.jneumeth.2016.06.001	Elsevier BV	Journal of neuroscience methods	0165-0270, 1872-678X	A linear model for event-related respiration responses	1921.78	TRUE	not applicable	unknown	cc-by	not applicable	hybrid	TRUE	Wellcome Trust
PMC5012886	27378027	10.1016/j.jneumeth.2016.07.002	Elsevier BV	Journal of neuroscience methods	0165-0270, 1872-678X	Brain tissue stiffness is a sensitive marker for acidosis.	1963.76	TRUE	not applicable	FALSE	cc-by	not applicable	hybrid	TRUE	epsrc, mrc, wellcome-trust, HFSP	0	0	G0701476
PMC4840017	26952847	10.1016/j.jneumeth.2016.03.003	Elsevier BV	Journal of neuroscience methods	0165-0270, 1872-678X	Sensor space group analysis for fNIRS data	1649.69	TRUE	not applicable	FALSE	cc-by-nc-nd	unknown	hybrid	FALSE	Wellcome Trust			91593	091593/Z/10/Z
PMC5026679	27401509	10.1016/j.jpainsymman.2016.05.009	Elsevier BV	Journal of pain and symptom management	0885-3924, 1873-6513	Palliative care declarations: mapping a new form of intervention	2751.05	TRUE	not applicable	unknown	cc-by	not applicable	hybrid	TRUE	Wellcome Trust (WELLCOME)
PMC4918692	26932253	10.1016/j.jpedsurg.2016.02.013	Elsevier BV	Journal of pediatric surgery	0022-3468, 1531-5037	Effect of Gestational Age at Birth on Neonatal Outcomes in Gastroschisis	1739.96	TRUE	not applicable	unknown	cc-by	not applicable	hybrid	TRUE	Wellcome Trust
PMC4840275	26836145	10.1016/j.vascn.2016.01.007	Elsevier BV	Journal of pharmacological and toxicological methods	1056-8719, 1873-488X	Assessing structural and functional responses of murine hearts to acute and sustained ÃŸ-adrenergic stimulation in vivo	2591.29	TRUE	not applicable	unknown	cc-by	not applicable	hybrid	TRUE	British Heart Foundation			PG/12/48/29638	PG/12/48/29,638
PMC4683093	26606725	10.1016/j.jpsychires.2015.10.017	Elsevier BV	Journal of psychiatric research	0022-3956, 1879-1379	Novelty, conditioning and attentional bias to sexual rewards.	1918.34	TRUE	not applicable	unknown	cc-by	not applicable	hybrid	TRUE	wellcome-trust,	0	0	93875	WT093705/Z/10/Z
PMC4866554	27060340	10.1016/j.jpsychires.2016.03.010	Elsevier BV	Journal of psychiatric research	0022-3956, 1879-1379	Multimodal EEG-MRI in the differential diagnosis of Alzheimer's disease and dementia with Lewy bodies	2375.14	TRUE	not applicable	unknown	cc-by	not applicable	hybrid	TRUE	Wellcome Trust
PMC5119576	27580487	10.1016/j.jpsychires.2016.08.010	Elsevier BV	Journal of psychiatric research	0022-3956, 1879-1379	Problematic internet use (PIU): associations with the impulsive-compulsive spectrum	2769.35	TRUE	not applicable	unknown	cc-by	not applicable	hybrid	TRUE	wellcome-trust, Also: Academy of Medical Sciences (AMS)
PMC4678258	26652589	10.1016/j.jpsychores.2015.10.012	Elsevier BV	Journal of psychosomatic research	0022-3999, 1879-1360	Cost-effectiveness of integrated collaborative care for comorbid major depression in patients with cancer.	2354.16	TRUE	not applicable	unknown	cc-by	not applicable	hybrid	TRUE	Cancer Research UK	0	0	G0800803	C5547/A7375
PMC4796022	26944399	10.1016/j.jpsychores.2016.01.008	Elsevier BV	Journal of psychosomatic research	0022-3999, 1879-1360	Rumination and behavioural factors in Parkinson's disease depression	2591.85	TRUE	not applicable	unknown	cc-by	not applicable	hybrid	TRUE	Parkinson's UK			J-0601
PMC4764650	26637953	10.1016/j.jri.2015.11.002	Elsevier BV	Journal of reproductive immunology	0165-0378, 1872-7603	Cervical leukocytes and spontaneous preterm birth	1572.56	TRUE	not applicable	unknown	cc-by	not applicable	hybrid	TRUE	Wellcome Trust			097815/Z11/B
PMC4916995	26383875	10.1016/j.jsams.2015.08.002	Elsevier BV	Journal of science and medicine in sport	1440-2440, 1878-1861	Scapula kinematics of pull-up techniques: Avoiding impingement risk with training changes	1846.99	TRUE	not applicable	unknown	cc-by	not applicable	hybrid	TRUE				88844
PMC5176093	27576214	10.1016/j.jstrokecerebrovasdis.2016.08.007	Elsevier BV	Journal of stroke and cerebrovascular diseases : the official journal of National Stroke Association	1052-3057, 1532-8511	Endothelial function, inflammation, thrombosis and basal ganglia perivascular spaces in patients with stroke	2343.61	TRUE	not applicable	unknown	cc-by	not applicable	hybrid	TRUE	British Heart Foundation			TSA 15 LECT 04
PMC4533229	26123262	10.1016/j.jsb.2015.05.008	Elsevier BV	Journal of structural biology	1047-8477, 1095-8657	Crystal structure of R-spondin 2 in complex with the ectodomains of its receptors LGR5 and ZNRF3	1753.06	TRUE	not applicable	unknown	cc-by	not applicable	hybrid	TRUE	Wellcome Trust			090532/Z/09/Z	G9900061	A10976
PMC4597613	26291392	10.1016/j.jsb.2015.08.009	Elsevier BV	Journal of structural biology	1047-8477, 1095-8657	Polyhedra structures and the evolution of the insect viruses	1762.1	TRUE	not applicable	unknown	cc-by	not applicable	hybrid	TRUE	Wellcome Trust			090532/Z/10/Z	90532	G100099
PMC5131608	27612581	10.1016/j.jsb.2016.08.006	Elsevier BV	Journal of structural biology	1047-8477, 1095-8657	Structures of type IV pilins from Thermus thermophilus demonstrate similarities with type II secretion system pseudopilins.	2391.48	TRUE	not applicable	unknown	cc-by	not applicable	hybrid	TRUE
unknown	27374320	10.1016/j.jsb.2016.06.024	Elsevier BV	Journal of structural biology	1047-8477, 1095-8657	Cellular electron cryo tomography and in situ sub-volume averaging reveal the context of microtubule-based processes	2377.19	FALSE	TRUE	not applicable	unknown	unknown	hybrid	FALSE	Wellcome Trust
unknown	27345930	10.1016/j.jsb.2016.06.017	Elsevier BV	Journal of structural biology	1047-8477, 1095-8657	Native structure of a retroviral envelope protein and its conformational change upon interaction with the target cell	2377.19	FALSE	TRUE	not applicable	unknown	unknown	hybrid	FALSE	Wellcome Trust			R01 CA098727
PMC4927461	27343883	10.1016/j.jaac.2016.04.014	Elsevier BV	Journal of the American Academy of Child and Adolescent Psychiatry	0890-8567, 1527-5418	The status of irritability in psychiatry: a conceptual and quantitative review	407.75	TRUE	not applicable	unknown	cc-by	not applicable	hybrid	TRUE	Wellcome Trust
PMC4695393	26703909	10.1016/j.jaac.2015.10.013	Elsevier BV	Journal of the American Academy of Child and Adolescent Psychiatry	0890-8567, 1527-5418	Positive Attributes Buffer the Negative Associations Between Low Intelligence and High Psychopathology With Educational Outcomes	1952.77	TRUE	not applicable	unknown	cc-by	not applicable	hybrid	TRUE	Wellcome Trust
PMC4925621	27364051	10.1016/j.jacc.2016.03.597	Elsevier BV	Journal of the American College of Cardiology	0735-1097, 1558-3597	Ectopic and visceral fat deposition in lean and obese type 2 diabetes patients	2683.44	TRUE	not applicable	unknown	cc-by	not applicable	hybrid	TRUE	Wellcome Trust
PMC4728170	26821631	10.1016/j.jacc.2015.10.085	Elsevier BV	Journal of the American College of Cardiology	0735-1097, 1558-3597	Blood Oxygenation Level Dependent (BOLD)-CMR Derived Measures in Critical Limb Ischemia and Changes with Revascularization	2206.45	TRUE	not applicable	FALSE	non-standard-licence	unknown	hybrid	FALSE	British Heart Foundation			1719	FS/13/74/30425	FS/11/37/28819
PMC4990139	27436128	10.1016/j.jash.2016.06.028	Elsevier BV	Journal of the American Society of Hypertension : JASH	1933-1711, 1878-7436	Lower is better in hypertension, but how low should blood pressure be targeted?	2085.94	TRUE	not applicable	unknown	cc-by	not applicable	hybrid	TRUE	British Heart Foundation (BHF)
PMC5016039	27457092	10.1016/j.jtbi.2016.07.028	Elsevier BV	Journal of theoretical biology	0022-5193, 1095-8541	Stochastic multi-scale models of competition within heterogeneous cellular populations: simulation methods and mean-field analysis	1961.43	TRUE	not applicable	unknown	cc-by	not applicable	hybrid	TRUE	Wellcome Trust			U01 CA177799
PMC5042028	27418386	10.1016/j.jtbi.2016.07.003	Elsevier BV	Journal of theoretical biology	0022-5193, 1095-8541	Physiological, aerodynamic and geometric constraints of flapping account for bird gaits, and bounding and flap-gliding flight strategies.	2527.37	TRUE	not applicable	unknown	cc-by	not applicable	hybrid	TRUE
PMC5063510	27296105	10.1016/j.jtho.2016.05.028	Elsevier BV	Journal of thoracic oncology : official publication of the International Association for the Study of Lung Cancer	1556-0864, 1556-1380	Outcome and biomarker analysis from a multi-centre phase 2 study of ipilimumab in combination with carboplatin and etoposide (ICE) as first line therapy for extensive stage small cell lung cancer	1815.47	TRUE	not applicable	FALSE	cc-by-nc-nd	unknown	hybrid	FALSE	Cancer Research UK	0	0
		10.1016/j.jth.2015.11.002	Elsevier BV	Journal of Transport & Health	2214-1405	Variability in baseline travel behaviour as a predictor of changes in commuting by active travel, car and public transport: a natural experimental study	1357.85	FALSE	TRUE	not applicable	unknown	unknown	hybrid	FALSE	british-heart-foundation, esrc, mrc, nihr, wellcome-trust, nihr	0	0
		10.1016/j.jtrangeo.2016.04.006	Elsevier BV	Journal of Transport Geography	0966-6923	Motives, perceptions and experiences of electric bicycle owners and implications for health, wellbeing and mobility	927.17	FALSE	TRUE	not applicable	unknown	unknown	hybrid	FALSE	british-heart-foundation, cancer-research-uk, esrc, mrc, nihr, wellcome-trust,	0	0
unknown	unknown	10.1016/j.jtrangeo.2016.08.012	Elsevier BV	Journal of Transport Geography	0966-6923	The impact of car ownership and public transport usage on cancer screening coverage: Empirical evidence using a spatial analysis in England	1027.7	FALSE	TRUE	not applicable	unknown	unknown	hybrid	FALSE
PMC5035134	27503805	10.1016/j.kint.2016.06.014	Elsevier BV	Kidney international	0085-2538, 1523-1755	Defining myocardial abnormalities in end stage renal failure with cardiac magnetic resonance imaging using native T1 mapping	1989.3	TRUE	not applicable	unknown	cc-by	not applicable	hybrid	TRUE	British Heart Foundation			IN2/2013
PMC4676083	26422507	10.1038/ki.2015.286	Elsevier BV	Kidney international	0085-2538, 1523-1755	Integrated transcriptomic and proteomic analyses uncover regulatory roles of Nrf2 in the kidney	2173.7	TRUE	not applicable	TRUE	non-standard-licence	unknown	hybrid	FALSE	Wellcome Trust	MRC		94128	MR/L006758/1	G0700654
unknown	27317356	10.1016/j.kint.2016.04.010	Elsevier BV	Kidney international	0085-2538, 1523-1755	Methodological challenges when carrying out research on CKD	2234.49	FALSE	FALSE	not applicable	unknown	unknown	hybrid	FALSE	Wellcome Trust
PMC5075047	26684609	10.1016/s0140-6736(15)01087-9	Elsevier BV	Lancet (London, England)	0140-6736, 1474-547X	Does happiness itself directly affect mortality? The prospective UK Million Women Study	2195.6	TRUE	not applicable	unknown	cc-by	not applicable	hybrid	TRUE	Cancer Research UK	MRC		16491	MR/K02700X/1	unknown
PMC4800035	26719232	10.1016/s0140-6736(15)01037-5	Elsevier BV	Lancet (London, England)	0140-6736, 1474-547X	Addition of docetaxel, zoledronic acid, or both to first-line long-term hormone therapy in prostate cancer (STAMPEDE): survival results from an adaptive, multiarm, multistage, platform randomised controlled trial	4124.75	TRUE	not applicable	unknown	cc-by	not applicable	hybrid	TRUE	Cancer Research UK	MRC		13239	651	unknown
PMC5082599	27604504	10.1016/s0140-6736(16)30825-x	Elsevier BV	Lancet (London, England)	0140-6736, 1474-547X	Dexamethasone and supportive care with or without whole brain radiotherapy in treating patients with non-small cell lung cancer with brain metastases unsuitable for resection or stereotactic radiotherapy (QUARTZ): results from a phase 3, non-inferiority..	4126.28	TRUE	not applicable	unknown	cc-by	not applicable	hybrid	TRUE	Cancer Research UK	MRC		20465
PMC4967715	27209148	10.1016/s0140-6736(16)30386-5	Elsevier BV	Lancet (London, England)	0140-6736, 1474-547X	Late Ebola virus relapse causing meningoencephalitis: a case report	4144.76	TRUE	not applicable	FALSE	non-standard-licence	unknown	hybrid	FALSE	Wellcome Trust (WELLCOME)			102789/Z/13/Z	unknown
PMC4779792	26707054	10.1016/s0140-6736(15)01224-6	Elsevier BV	Lancet (London, England)	0140-6736, 1474-547X	Ovarian cancer screening and mortality in the UK Collaborative Trial of Ovarian Cancer Screening (UKCTOCS): a randomised controlled trial	4245.06	TRUE	not applicable	FALSE	non-standard-licence	unknown	hybrid	FALSE	Cancer Research UK	MRC		C1479/A2884	CA152990	unknown
PMC4772451	26231457	10.1016/s0140-6736(15)60098-8	Elsevier BV	Lancet (London, England)	0140-6736, 1474-547X	The effect of early, comprehensive genomic testing on clinical care in neonatal diabetes: an international cohort study	3980.89	TRUE	not applicable	FALSE	non-standard-licence	unknown	hybrid	FALSE	Wellcome Trust	Other	0	WT097835MF	WT098395/Z/12/Z	WT101650MA
PMC5081106	27061677	10.1016/s0140-6736(16)00618-8	Elsevier BV	Lancet (London, England)	0140-6736, 1474-547X	Worldwide trends in diabetes since 1980: a pooled analysis of 751 population-based studies with 4.4 million participants	3790.62	TRUE	not applicable	TRUE	non-standard-licence	unknown	hybrid	FALSE				unknown	MC_U147574245	MC_UP_A620_1016
PMC5000546	26874031	10.1016/j.lfs.2016.02.036	Elsevier BV	Life sciences	0024-3205, 1879-0631	Endothelin ETA receptors predominate in chronic thromboembolic pulmonary hypertension.	2713.1	TRUE	not applicable	unknown	cc-by	not applicable	hybrid	TRUE	nihr, wellcome-trust, bhf, mrc	0	0
PMC5000545	26898124	10.1016/j.lfs.2016.02.069	Elsevier BV	Life sciences	0024-3205, 1879-0631	Evidence for biased agonists and antagonists at the endothelin receptors.	2722.43	TRUE	not applicable	FALSE	cc-by	not applicable	hybrid	TRUE	wellcome-trust,	0	0
PMC4718929	26363803	10.1016/j.lungcan.2015.08.017	Elsevier BV	Lung cancer (Amsterdam, Netherlands)	0169-5002, 1872-8332	The relationship between COPD and lung cancer	1965.99	TRUE	not applicable	FALSE	cc-by-nc-nd	unknown	hybrid	FALSE				093080/Z/10/Z	G1001367/1
PMC5082966	27590776	10.1016/j.mbs.2016.08.010	Elsevier BV	Mathematical biosciences	0025-5564, 1879-3134	A two-variable model robust to pacemaker behaviour for the dynamics of the cardiac action potential	2158.54	TRUE	not applicable	unknown	cc-by	not applicable	hybrid	TRUE	British Heart Foundation
PMC5080453	26829466	10.1016/j.matbio.2016.01.019	Elsevier BV	Matrix biology : journal of the International Society for Matrix Biology	0945-053X, 1569-1802	Structural characterization of twisted gastrulation provides insights into opposing functions on the BMP signalling pathway.	2634.66	TRUE	not applicable	unknown	cc-by	not applicable	hybrid	TRUE				BB/I019286/1	BB/I012265/1
PMC5146981	27084377	10.1016/j.matbio.2016.03.007	Elsevier BV	Matrix biology : journal of the International Society for Matrix Biology	0945-053X, 1569-1802	MMP-13 is constitutively produced in human chondrocytes and co-endocytosed with ADAMTS-5 and TIMP-3 by the endocytic receptor LRP1	2773.41	TRUE	not applicable	unknown	cc-by	not applicable	hybrid	TRUE	Arthritis Research UK			19466	20563	R01 HL114379
	27569273	10.1016/j.matbio.2016.08.010	Elsevier BV	Matrix biology : journal of the International Society for Matrix Biology	0945-053X, 1569-1802	Unique charge-dependent constraint on collagen recognition by integrin alpha10beta1	2994.94	FALSE	TRUE	not applicable	unknown	unknown	hybrid	FALSE	british-heart-foundation, wellcome-trust,
unknown	27282658	10.1016/j.mad.2016.04.012	Elsevier BV	Mechanisms of ageing and development	0047-6374, 1872-6216	Chemical screening identifies the ?-Carboline alkaloid harmine to be synergistically lethal with doxorubicin	2209.36	FALSE	TRUE	not applicable	unknown	unknown	hybrid	FALSE	The Wellcome Trust
PMC4798847	26776863	10.1016/j.mod.2016.01.001	Elsevier BV	Mechanisms of development	0925-4773, 1872-6356	Ventricular cell fate can be specified until the onset of myocardial differentiation MOD 3388	1497.96	TRUE	not applicable	unknown	cc-by	not applicable	hybrid	TRUE	British Heart Foundation		0	FS/05/044
PMC4751405	26499366	10.1016/j.medengphy.2015.09.004	Elsevier BV	Medical engineering & physics	1350-4533, 1873-4030	Mechanisms of pro-arrhythmic abnormalities in ventricular repolarisation and anti-arrhythmic therapies in human hypertrophic cardiomyopathy	1606.65	TRUE	not applicable	unknown	cc-by	not applicable	hybrid	TRUE	Wellcome Trust
PMC4751405	26499366	10.1016/j.medengphy.2015.09.004	Elsevier BV	Medical engineering & physics	1350-4533, 1873-4030	Mechanisms of pro-arrhythmic abnormalities in ventricular repolarisation and anti-arrhythmic therapies in human hypertrophic cardiomyopathy	1901.46	TRUE	not applicable	unknown	cc-by	not applicable	hybrid	TRUE	Wellcome Trust
PMC4917895	27054278	10.1016/j.media.2016.03.002	Elsevier BV	Medical image analysis	1361-8415, 1361-8423	Pieces-of-parts for supervoxel segmentation with global context: Application to DCE-MRI tumour delineation	2147.99	TRUE	not applicable	unknown	cc-by	not applicable	hybrid	TRUE	Cancer Research UK			16466
PMC4686007	26606458	10.1016/j.media.2015.10.006	Elsevier BV	Medical image analysis	1361-8415, 1361-8423	Population-based Prediction of Subject-specific Prostate Deformation for MR-to-Ultrasound Image Registration	2367.34	TRUE	not applicable	unknown	cc-by	not applicable	hybrid	TRUE	Wellcome Trust			unknown	unknown
PMC5052128	27179367	10.1016/j.media.2016.04.009	Elsevier BV	Medical image analysis	1361-8415, 1361-8423	Slic-Seg: A minimally interactive segmentation of the placenta from sparse and motion-corrupted fetal MRI in multiple views	2525.94	TRUE	not applicable	unknown	cc-by	not applicable	hybrid	TRUE	Wellcome Trust	EPSRC
PMC4112878	25083080	10.3748/wjg.v20.i27.9072	Elsevier BV	Metabolism	1007-9327, 2219-2840	Non-alcoholic fatty liver disease and diabetes	2075.68	TRUE	not applicable	FALSE	cc-by	cc-by	hybrid	TRUE	Wellcome Trust
PMC4766367	26892515	10.1016/j.metabol.2015.10.018	Elsevier BV	Metabolism: clinical and experimental	0026-0495, 1532-8600	The Genetic Spectrum of Familial Hypercholesterolemia in South-Eastern Poland	1584	TRUE	not applicable	unknown	cc-by	not applicable	hybrid	TRUE	British Heart Foundation			unknown
PMC4773406	26608109	10.1016/j.ymeth.2015.11.012	Elsevier BV	Methods (San Diego, Calif.)	1046-2023, 1095-9130	A high-content platformto characterise human induced pluripotent stem cell lines	1268.97	TRUE	not applicable	unknown	cc-by	not applicable	hybrid	TRUE	Wellcome Trust			unknown	98503	MR/K026666/1
PMC4641872	26123184	10.1016/j.ymeth.2015.06.017	Elsevier BV	Methods (San Diego, Calif.)	1046-2023, 1095-9130	A straightforward approach for gated STED-FCS to investigate lipid membrane dynamics	1878.02	TRUE	not applicable	unknown	cc-by	not applicable	hybrid	TRUE	Wellcome Trust			unknown	MC_UU_12010/9	MR/K01577X/1
PMC4773399	26476368	10.1016/j.ymeth.2015.10.006	Elsevier BV	Methods (San Diego, Calif.)	1046-2023, 1095-9130	Metadata management for high content screening in OMERO	2134.3	TRUE	not applicable	unknown	cc-by	not applicable	hybrid	TRUE	Wellcome Trust			095931/Z/11/Z	95931	BB/M018423/1
PMC4854231	26931652	10.1016/j.ymeth.2016.02.017	Elsevier BV	Methods (San Diego, Calif.)	1046-2023, 1095-9130	An introduction to sample preparation and imaging by cryo-electron microscopy for structural biology	2264.63	TRUE	not applicable	unknown	cc-by	not applicable	hybrid	TRUE	Wellcome Trust	0	0
PMC4819770	26564237	10.1016/j.ymeth.2015.11.009	Elsevier BV	Methods (San Diego, Calif.)	1046-2023, 1095-9130	Super-resolution measurement of distance between transcription sites using RNA FISH with intronic probes	2476.87	TRUE	not applicable	unknown	cc-by	not applicable	hybrid	TRUE	Wellcome Trust
PMC4854228	27016144	10.1016/j.ymeth.2016.03.011	Elsevier BV	Methods (San Diego, Calif.)	1046-2023, 1095-9130	Methods to account for movement and flexibility in cryo-EM data processing.	2790.75	TRUE	not applicable	unknown	cc-by	not applicable	hybrid	TRUE	MRC	Wellcome Trust	0
unknown	26638773	10.1016/j.ymeth.2015.11.023	Elsevier BV	Methods (San Diego, Calif.)	1046-2023, 1095-9130	Cryo electron microscopy to determine the structure of macromolecular complexes	2843.94	FALSE	FALSE	not applicable	unknown	unknown	hybrid	FALSE	Wellcome Trust			89050
PMC4796715	27047763	10.1016/j.mex.2016.02.006	Elsevier BV	MethodsX	2215-0161	Instrumentation To Study Myofibril Mechanics From Static To Artificial Simulations Of Cardiac Cycle	521.08	TRUE	not applicable	unknown	cc-by	not applicable	oa	TRUE				RG/11/20/29266
PMC4936793	27021640	10.1016/j.micinf.2016.03.010	Elsevier BV	Microbes and infection	1286-4579, 1769-714X	IRE1Î± mediates PKR activation in response to Chlamydia trachomatis infection.	1679.43	TRUE	not applicable	FALSE	cc-by	not applicable	hybrid	TRUE	mrc, nihr, Arthritis Research UK Cambridge Arthritis Research Endeavour (CARE).	0	0	19639
PMC4850246	26946399	10.1016/j.molbiopara.2016.02.009	Elsevier BV	Molecular and biochemical parasitology	0166-6851, 1872-9428	Polycistronic trypanosome mRNAs are a target for the exosome.	1495.99	TRUE	not applicable	FALSE	cc-by	not applicable	hybrid	TRUE	wellcome-trust,	0	0	085956/Z/08/Z
PMC5154328	26844642	10.1016/j.molbiopara.2016.01.007	Elsevier BV	Molecular and biochemical parasitology	0166-6851, 1872-9428	Vacuolar protein sorting mechanisms in apicomplexan parasites	1505.34	TRUE	not applicable	unknown	cc-by	not applicable	hybrid	TRUE	Wellcome Trust (WELLCOME)			309255
PMC4850487	26996431	10.1016/j.molbiopara.2016.03.004	Elsevier BV	Molecular and biochemical parasitology	0166-6851, 1872-9428	Phosphorylation of eIF2Î± on Threonine 169 is not required for Trypanosoma brucei cell cycle arrest during differentiation.	1516.95	TRUE	not applicable	FALSE	cc-by	not applicable	hybrid	TRUE	wellcome-trust, FAPESP and CNPq	0	0
PMC4920640	27063979	10.1016/j.molbiopara.2016.04.001	Elsevier BV	Molecular and biochemical parasitology	0166-6851, 1872-9428	A vanillic acid inducible expression system for Trypanosoma brucei	1559.02	TRUE	not applicable	unknown	cc-by	not applicable	hybrid	TRUE	Wellcome Trust
	27485555	10.1016/j.molbiopara.2016.07.004	Elsevier BV	Molecular and biochemical parasitology	0166-6851, 1872-9428	Transcription of the apicoplast genome	1653.82	FALSE	FALSE	not applicable	unknown	unknown	hybrid	FALSE	wellcome-trust,
PMC4646839	26375424	10.1016/j.mce.2015.09.010	Elsevier BV	Molecular and cellular endocrinology	0303-7207, 1872-8057	Novel application of luciferase assay for the in vitro functional assessment of KAL1 variants in three females with septo-optic dysplasia (SOD)	1680.06	TRUE	not applicable	unknown	cc-by	not applicable	hybrid	TRUE	Wellcome Trust			86545	84361	W1055
PMC4942677	27292798	10.1016/j.molcel.2016.05.009	Elsevier BV	Molecular cell	1097-2765, 1097-4164	Prolonged mitotic arrest induces a caspase-dependent DNA damage response at telomeres that determines cell survival	1188	TRUE	not applicable	unknown	cc-by	not applicable	hybrid	TRUE	Cancer Research UK			102943	MC_UU_12016/6
PMC4518038	26166706	10.1016/j.molcel.2015.06.013	Elsevier BV	Molecular cell	1097-2765, 1097-4164	Identification of a Class of Protein ADP-Ribosylating Sirtuins in Microbial Pathogens	3191.47	TRUE	not applicable	unknown	cc-by	not applicable	hybrid	TRUE	Wellcome Trust			unknown	101794	22308
PMC4691244	26687677	10.1016/j.molcel.2015.11.011	Elsevier BV	Molecular cell	1097-2765, 1097-4164	DGCR8 Acts as an Adaptor for the Exosome Complex to Degrade Double-Stranded Structured RNAs	3287.43	TRUE	not applicable	unknown	cc-by	not applicable	hybrid	TRUE	Wellcome Trust			107665	095518/Z/11/Z	95518
PMC4781437	26942677	10.1016/j.molcel.2016.02.008	Elsevier BV	Molecular cell	1097-2765, 1097-4164	CDK1-Cyclin B1 Activates RNMT, Coordinating mRNA Cap Methylation with G1 Phase Transcription	3593.02	TRUE	not applicable	unknown	cc-by	not applicable	hybrid	TRUE	Wellcome Trust			097945/Z/11/Z	083524/Z/07/Z	unknown
PMC4980431	27397685	10.1016/j.molcel.2016.06.009	Elsevier BV	Molecular cell	1097-2765, 1097-4164	Ctf4 Is a Hub in the Eukaryotic Replisome that Links Multiple CIP-Box Proteins to the CMG Helicase	3692.91	TRUE	not applicable	unknown	cc-by	not applicable	hybrid	TRUE	Wellcome Trust			MC_UU_12016/13
PMC4747901	26748828	10.1016/j.molcel.2015.12.004	Elsevier BV	Molecular cell	1097-2765, 1097-4164	Targeting BRCA1 and BRCA2 Deficiencies with G-Quadruplex-Interacting Compounds.	3892.91	TRUE	not applicable	unknown	cc-by	not applicable	hybrid	TRUE	Cancer Research UK			92096	11224	MC_PC_12006
PMC4747905	26778126	10.1016/j.molcel.2015.12.017	Elsevier BV	Molecular cell	1097-2765, 1097-4164	Structure of BRCA1-BRCT/Abraxas Complex Reveals Phosphorylation-Dependent BRCT Dimerization at DNA Damage Sites.	3931.67	TRUE	not applicable	unknown	cc-by	not applicable	hybrid	TRUE	wellcome-trust, mrc	0	0	093167/Z/10/Z	98101	CA155025
PMC4351672	25699710	10.1016/j.molcel.2015.01.011	Elsevier BV	Molecular cell	1097-2765, 1097-4164	BRCA1 Recruitment to Transcriptional Pause Sites Is Required for R-Loop-Driven DNA Damage Repair	3966.94	TRUE	not applicable	unknown	cc-by	not applicable	hybrid	TRUE	Wellcome Trust			unknown	2P01CA80111-16	5P30 CA006516-46
PMC4643306	26455393	10.1016/j.molcel.2015.09.019	Elsevier BV	Molecular cell	1097-2765, 1097-4164	USP4 Auto-Deubiquitylation Promotes Homologous Recombination.	3988.22	TRUE	not applicable	unknown	cc-by	not applicable	hybrid	TRUE	cancer-research-uk, ec fp7, Wellcome trust,	0	0	C6946/A14492	097813/Z/11/Z	92096
PMC4980432	27373333	10.1016/j.molcel.2016.05.037	Elsevier BV	Molecular cell	1097-2765, 1097-4164	Structure of a complete mitochondrial ATP synthase dimer reveals molecular basis of inner membrane morphology	4096.12	TRUE	not applicable	unknown	cc-by	not applicable	hybrid	TRUE
PMC4769319	26895426	10.1016/j.molcel.2016.01.025	Elsevier BV	Molecular cell	1097-2765, 1097-4164	Cohesin releases DNA through asymmetric ATPase-driven ring opening	4176.55	TRUE	not applicable	unknown	cc-by	not applicable	hybrid	TRUE	Cancer Research UK	Wellcome Trust		091859/Z/10/Z	C573/A 12386
PMC4769318	26895425	10.1016/j.molcel.2016.01.026	Elsevier BV	Molecular cell	1097-2765, 1097-4164	Releasing activity disengages cohesin's Smc3/Scc1 interface in a process	4216.38	TRUE	not applicable	unknown	cc-by	not applicable	hybrid	TRUE	Cancer Research UK	Wellcome Trust		091859/Z/10/Z	C573/A 12386
PMC4858568	27067600	10.1016/j.molcel.2016.03.008	Elsevier BV	Molecular cell	1097-2765, 1097-4164	HPF1/C4orf27 is a PARP-1-interacting protein that regulates PARP-1 ADP-ribosylation activity	4330.62	TRUE	not applicable	unknown	cc-by	not applicable	hybrid	TRUE	Wellcome Trust			281739
PMC5065530	27546791	10.1016/j.molcel.2016.08.002	Elsevier BV	Molecular cell	1097-2765, 1097-4164	53BP1 integrates DNA repair and p53-dependent cell fate decisions via distinct mechanisms	4552.78	TRUE	not applicable	unknown	cc-by	not applicable	hybrid	TRUE	Wellcome Trust
PMC5031558	27591049	10.1016/j.molcel.2016.08.001	Elsevier BV	Molecular cell	1097-2765, 1097-4164	SPATA2 links CYLD to LUBAC, activates CYLD and controls LUBAC signaling	4657.28	TRUE	not applicable	unknown	cc-by	not applicable	hybrid	TRUE	Wellcome Trust			309756
PMC4876031	26898221	10.1038/mt.2016.41	Elsevier BV	Molecular therapy : the journal of the American Society of Gene Therapy	1525-0016, 1525-0024	A role of long non-coding RNA SENCR in commitment and function of endothelial cells	2280	TRUE	not applicable	unknown	cc-by	not applicable	hybrid	TRUE	British Heart Foundation			FS/10/001/27959	SP/10/005/28298	RM/13/2/30158
PMC4982542	27133965	10.1038/mt.2016.91	Elsevier BV	Molecular therapy : the journal of the American Society of Gene Therapy	1525-0016, 1525-0024	Rapid and efficient stable gene transfer to mesenchymal stromal cells using a modified foamy virus vector	3240	TRUE	not applicable	unknown	cc-by	not applicable	hybrid	TRUE
PMC4830362	27110583	10.1038/mtm.2016.24	Elsevier BV	Molecular therapy. Methods & clinical development	2329-0501	Fbxw7- associated drug resistance is reversed by induction of terminal differentiation in murine intestinal organoid culture	3120	TRUE	not applicable	unknown	cc-by	not applicable	oa	TRUE	Cancer Research UK	Other	0
PMC4949379	27013131	10.1016/j.nano.2016.02.017	Elsevier BV	Nanomedicine : nanotechnology, biology, and medicine	1549-9634, 1549-9642	Regulation of angiogenesis through the efficient delivery of microRNAs into endothelial cells using polyamine-coated carbon nanotubes	2328.25	TRUE	not applicable	unknown	cc-by	not applicable	hybrid	TRUE	British Heart Foundation
PMC4681879	26667353	10.1016/j.neunet.2015.10.005	Elsevier BV	Neural networks : the official journal of the International Neural Network Society	0893-6080, 1879-2782	Choice reaching with a LEGO arm robot (CoRLEGO): The motor system guides visual attention to movement-relevant information	2391.59	TRUE	not applicable	unknown	cc-by	not applicable	hybrid	TRUE	Wellcome Trust	EPSRC	0
PMC4706155	26507309	10.1016/j.neurobiolaging.2015.09.022	Elsevier BV	Neurobiology of aging	0197-4580, 1558-1497	Lack of association between TDP-43 pathology and tau mis-splicing in Alzheimer's disease	1164.73	TRUE	not applicable	unknown	cc-by	not applicable	hybrid	TRUE	Wellcome Trust			unknown	89701
PMC5024078	27289440	10.1016/j.neurobiolaging.2016.04.004	Elsevier BV	Neurobiology of aging	0197-4580, 1558-1497	ABCA7 p.G215S as potential protective factor for Alzheimer's disease	2127	TRUE	not applicable	unknown	cc-by	not applicable	hybrid	TRUE	Wellcome Trust	MRC		ARUK-TRFUS2012-3	P50 AG016574	R01 AG018023
PMC4759605	26639155	10.1016/j.neurobiolaging.2015.10.033	Elsevier BV	Neurobiology of aging	0197-4580, 1558-1497	Reduced mitochondrial DNA copy number is a biomarker of Parkinson's disease	2301.67	TRUE	not applicable	unknown	cc-by	not applicable	hybrid	TRUE	Parkinsons UK			F-1202	G0400074	MR/L016451/1
PMC4782737	26923415	10.1016/j.neurobiolaging.2015.12.001	Elsevier BV	Neurobiology of aging	0197-4580, 1558-1497	Imaging the accumulation and suppression of tau pathology using multi-parametric MRI	2332.45	TRUE	not applicable	unknown	cc-by	not applicable	hybrid	TRUE	Wellcome Trust	MRC		WT100247MA	98327	16463
PMC4782736	26923412	10.1016/j.neurobiolaging.2015.12.006	Elsevier BV	Neurobiology of aging	0197-4580, 1558-1497	Functional neuroanatomy of spatial sound processing in Alzheimer's disease	2504.07	TRUE	not applicable	unknown	cc-by	not applicable	hybrid	TRUE	Wellcome Trust	ESRC		091673/Z/10/Z	ES/L001810/1	ARUK-SRF2013-8
PMC5082766	27562529	10.1016/j.neurobiolaging.2016.07.010	Elsevier BV	Neurobiology of aging	0197-4580, 1558-1497	Obesity associated with increased brain-age from mid-life	2999.21	TRUE	not applicable	unknown	cc-by	not applicable	hybrid	TRUE	bbsrc, wellcome-trust, Bernard Wolfe Health Neuroscience Fund			93875	BB/H008217/1
PMC5082764	27565302	10.1016/j.neurobiolaging.2016.07.017	Elsevier BV	Neurobiology of aging	0197-4580, 1558-1497	A spatial covariance 123I-5IA-85380 SPECT study of ?4?2 nicotinic receptors in Alzheimer's disease	3099.2	TRUE	not applicable	unknown	cc-by	not applicable	hybrid	TRUE	Wellcome Trust
PMC5021248	27614017	10.1016/j.neurobiolaging.2016.06.020	Elsevier BV	Neurobiology of aging	0197-4580, 1558-1497	Combinational losses of synucleins reveal their differential requirements for compensating age-dependent alterations in motor behavior and dopamine metabolism	3324.11	TRUE	not applicable	unknown	cc-by	not applicable	hybrid	TRUE	Wellcome Trust	0	0	75615	G-1006
unknown	27565301	10.1016/j.neurobiolaging.2016.07.007	Elsevier BV	Neurobiology of aging	0197-4580, 1558-1497	White matter integrity as a marker for cognitive plasticity in aging	3223.03	FALSE	FALSE	not applicable	unknown	unknown	hybrid	FALSE	Wellcome Trust
PMC4838669	26388395	10.1016/j.nbd.2015.09.006	Elsevier BV	Neurobiology of disease	0969-9961, 1095-953X	Mitochondrial dysfunction associated with glucocerebrosidase deficiency	1437.78	TRUE	not applicable	unknown	cc-by	not applicable	hybrid	TRUE	Wellcome Trust	MRC		WT089698	AS2012	G-1403
PMC4731014	26687546	10.1016/j.nbd.2015.12.001	Elsevier BV	Neurobiology of disease	0969-9961, 1095-953X	Inhaled 45Â–50% argon augments hypothermic brain protection in a piglet model of perinatal asphyxia	1571	TRUE	not applicable	unknown	cc-by	not applicable	hybrid	TRUE	Wellcome Trust	MRC		104580	RG1464
PMC4940211	27260834	10.1016/j.nbd.2016.05.020	Elsevier BV	Neurobiology of disease	0969-9961, 1095-953X	A CaV2.1 N-terminal fragment relieves the dominant-negative inhibition by an Episodic Ataxia 2 mutant	1576	TRUE	not applicable	unknown	cc-by	not applicable	hybrid	TRUE	Wellcome Trust	MRC		G0901758
PMC4867789	26921471	10.1016/j.nbd.2016.02.018	Elsevier BV	Neurobiology of disease	0969-9961, 1095-953X	In-vivo evidence that high mobility group box 1 exerts deleterious effects in the 1-methyl-4-phenyl-1,2,3,6-tetrahydropyridine model and Parkinson's Disease which can be attenuated by glycyrrhizin	1663.34	TRUE	not applicable	unknown	cc-by	not applicable	hybrid	TRUE				1373274
PMC4915441	26409031	10.1016/j.nbd.2015.09.011	Elsevier BV	Neurobiology of disease	0969-9961, 1095-953X	Perinatal brain damage: the term infant	1707.67	TRUE	not applicable	unknown	cc-by	not applicable	hybrid	TRUE	Wellcome Trust
PMC4731015	26707700	10.1016/j.nbd.2015.12.004	Elsevier BV	Neurobiology of disease	0969-9961, 1095-953X	Gene co-expression networks shed light into diseases of brain iron accumulation	1865.62	TRUE	not applicable	unknown	cc-by	not applicable	hybrid	TRUE	Wellcome Trust	MRC		WT093205MA	WT089698	WT104033/Z/14/Z
PMC5045461	26708279	10.1016/j.nlm.2015.11.018	Elsevier BV	Neurobiology of learning and memory	1074-7427, 1095-9564	Context-specific activation of hippocampus and SN/VTA by reward is related to enhanced long-term memory for embedded objects	1553.22	TRUE	not applicable	unknown	cc-by	not applicable	hybrid	TRUE	Wellcome Trust			91593	98362
PMC5115650	27623092	10.1016/j.neuint.2016.09.012	Elsevier BV	Neurochemistry international	0197-0186, 1872-9754	Kynurenine pathway metabolism following prenatal KMO inhibition and in Mecp2+/- mice, using liquid chromatography-tandem mass spectrometry	1694.97	TRUE	not applicable	unknown	cc-by	not applicable	hybrid	TRUE	Wellcome Trust (WELLCOME)
PMC4739512	26584867	10.1016/j.neuroimage.2015.11.020	Elsevier BV	NeuroImage	1053-8119, 1095-9572	Causal evidence that intrinsic beta frequency is relevant for enhanced signal propagation in the motor system as shown through rhythmic TMS	1374.84	TRUE	not applicable	unknown	cc-by	not applicable	hybrid	TRUE	Wellcome Trust			98434	98434	091593/Z/10/Z
PMC4655940	26375208	10.1016/j.neuroimage.2015.09.017	Elsevier BV	NeuroImage	1053-8119, 1095-9572	Changes in white matter microstructure in the developing brain - A longitudinal diffusion tensor imaging study of children from 4 to 11 years of age	1385.17	TRUE	not applicable	unknown	cc-by	not applicable	hybrid	TRUE	Wellcome Trust			WT090955AIA	90955	313440
PMC4692452	26458514	10.1016/j.neuroimage.2015.10.006	Elsevier BV	NeuroImage	1053-8119, 1095-9572	Specific white matter tissue microstructure changes associated with obesity	1393.75	TRUE	not applicable	unknown	cc-by	not applicable	hybrid	TRUE	Wellcome Trust			0915/Z/10/Z	91593
PMC4739510	26515905	10.1016/j.neuroimage.2015.10.071	Elsevier BV	NeuroImage	1053-8119, 1095-9572	The quest for the best: The impact of different EPI sequences on the sensitivity of random effect fMRI group analyses	1393.92	TRUE	not applicable	unknown	cc-by	not applicable	hybrid	TRUE	Wellcome Trust			0915/Z/10/Z	91593
PMC4692512	26520774	10.1016/j.neuroimage.2015.10.067	Elsevier BV	NeuroImage	1053-8119, 1095-9572	Neural signals encoding shifts in belief	1396	TRUE	not applicable	unknown	cc-by	not applicable	hybrid	TRUE	Wellcome Trust			091593/Z/10/Z	98362	098362/Z/12/Z
PMC4851455	26477656	10.1016/j.neuroimage.2015.09.071	Elsevier BV	NeuroImage	1053-8119, 1095-9572	A systematic review of MRI studies examining the relationship between physical fitness and activity and the white matter of the ageing brain	1422.86	TRUE	not applicable	unknown	cc-by	not applicable	hybrid	TRUE	Wellcome Trust			90955	PB-PG-0110-20250	MR/K013351/1
PMC4692519	26477650	10.1016/j.neuroimage.2015.10.013	Elsevier BV	NeuroImage	1053-8119, 1095-9572	Automatic segmentation of the striatum and globus pallidus using MIST: Multimodal Image Segmentation Tool	1422.86	TRUE	not applicable	unknown	cc-by	not applicable	hybrid	TRUE	Wellcome Trust			098369/Z/12/Z	98369	U54 MH091657
PMC4692656	26481672	10.1016/j.neuroimage.2015.10.019	Elsevier BV	NeuroImage	1053-8119, 1095-9572	An integrated approach to correction for off-resonance effects and subject movement in diffusion MR imaging	1422.86	TRUE	not applicable	unknown	cc-by	not applicable	hybrid	TRUE	Wellcome Trust			098369/Z/12/Z	U54 MH091657	EP/L023067/1
PMC4627362	26236030	10.1016/j.neuroimage.2015.07.067	Elsevier BV	NeuroImage	1053-8119, 1095-9572	Non-parametric representation and prediction of single- and multi-shell diffusion-weighted MRI data using Gaussian processes	1429.36	TRUE	not applicable	unknown	cc-by	not applicable	hybrid	TRUE	Wellcome Trust			98369	U54 MH091657	EP/L023067/1
PMC4692516	26477653	10.1016/j.neuroimage.2015.10.018	Elsevier BV	NeuroImage	1053-8119, 1095-9572	Tracer kinetic modelling for DCE-MRI quantification of subtle blood-brain barrier permeability	1433.17	TRUE	not applicable	unknown	cc-by	not applicable	hybrid	TRUE	Wellcome Trust			088134/Z/09/A
PMC4767216	26707890	10.1016/j.neuroimage.2015.12.016	Elsevier BV	NeuroImage	1053-8119, 1095-9572	The influence of contextual reward statistics on risk preference	1444.65	TRUE	not applicable	unknown	cc-by	not applicable	hybrid	TRUE	Wellcome Trust			091593/Z/10/Z	98362	098362/Z/12/Z
PMC4767222	26747747	10.1016/j.neuroimage.2015.12.042	Elsevier BV	NeuroImage	1053-8119, 1095-9572	Laser-evoked cortical responses in freely-moving rats reflect the activation of C-fibre afferent pathways	1478.87	TRUE	not applicable	unknown	cc-by	not applicable	hybrid	TRUE	Wellcome Trust			unknown
PMC4758822	26584870	10.1016/j.neuroimage.2015.11.030	Elsevier BV	NeuroImage	1053-8119, 1095-9572	Anterior insula coordinates hierarchical processing of tactile mismatch responses	1510.92	TRUE	not applicable	unknown	cc-by	not applicable	hybrid	TRUE	Wellcome Trust			91593	100227	88130
PMC4767224	26569570	10.1016/j.neuroimage.2015.11.015	Elsevier BV	NeuroImage	1053-8119, 1095-9572	Bayesian model reduction and empirical Bayes for group (DCM) studies	1510.92	TRUE	not applicable	unknown	cc-by	not applicable	hybrid	TRUE	Wellcome Trust			088130/Z/09/Z	91593
PMC4862965	26921713	10.1016/j.neuroimage.2016.02.055	Elsevier BV	NeuroImage	1053-8119, 1095-9572	Dynamic causal modelling of eye movements during pursuit: Confirming precision-encoding in V1 using MEG	1654.55	TRUE	not applicable	unknown	cc-by	not applicable	hybrid	TRUE	Wellcome Trust			91593
PMC5193176	26767946	10.1016/j.neuroimage.2015.12.050	Elsevier BV	NeuroImage	1053-8119, 1095-9572	Decoding negative affect personality trait from patterns of brain activation to threat stimuli	1656.56	TRUE	not applicable	unknown	cc-by	not applicable	hybrid	TRUE	Wellcome Trust			102845
PMC4819722	26854557	10.1016/j.neuroimage.2016.01.062	Elsevier BV	NeuroImage	1053-8119, 1095-9572	New tissue priors for improved automated classification of subcortical brain structures on MRI	1668.15	TRUE	not applicable	unknown	cc-by	not applicable	hybrid	TRUE	Wellcome Trust			91593	0915/Z/10/Z	616905
PMC4922759	27132047	10.1016/j.neuroimage.2016.04.062	Elsevier BV	NeuroImage	1053-8119, 1095-9572	Multiple value signals in dopaminergic midbrain and their role in avoidance contexts	1677.74	TRUE	not applicable	unknown	cc-by	not applicable	hybrid	TRUE	Wellcome Trust			91593
PMC4626540	25700953	10.1016/j.neuroimage.2015.02.023	Elsevier BV	NeuroImage	1053-8119, 1095-9572	In vivo imaging of tau pathology using multi-parametric quantitative MRI	1710	TRUE	not applicable	unknown	cc-by	not applicable	hybrid	TRUE	Wellcome Trust/Cancer Research UK	MRC/EPSRC		unknown	100247	16463
PMC4739513	26631815	10.1016/j.neuroimage.2015.11.047	Elsevier BV	NeuroImage	1053-8119, 1095-9572	Spectrally resolved fast transient brain states in electrophysiological data	1712.88	TRUE	not applicable	unknown	cc-by	not applicable	hybrid	TRUE	Wellcome Trust			102616/Z/13/Z	098369/Z/12/Z	092753/Z/10/Z
PMC5102697	25944610	10.1016/j.neuroimage.2015.04.052	Elsevier BV	NeuroImage	1053-8119, 1095-9572	A wavelet-based estimator of the degrees of freedom in denoised fMRI time series for probabilistic testing of functional connectivity and brain graphs.	1732.96	TRUE	not applicable	unknown	cc-by	not applicable	hybrid	TRUE	wellcome-trust, mrc	0	0	93875	G0001354	NF-SI-0513-10051
PMC4758826	26658925	10.1016/j.neuroimage.2015.11.060	Elsevier BV	NeuroImage	1053-8119, 1095-9572	Network mechanisms of intentional learning.	1732.96	TRUE	not applicable	FALSE	cc-by	not applicable	hybrid	TRUE	mrc, wellcome, erc	0	0	103838	U1055.01.002.00001.01
PMC5035135	27453157	10.1016/j.neuroimage.2016.07.044	Elsevier BV	NeuroImage	1053-8119, 1095-9572	Structural brain development between childhood and adulthood: Convergence across four longitudinal samples	1959.55	TRUE	not applicable	unknown	cc-by	not applicable	hybrid	TRUE	Wellcome Trust			263234	R01 MH087563	R01 HD053893
PMC4819592	26804778	10.1016/j.neuroimage.2016.01.032	Elsevier BV	NeuroImage	1053-8119, 1095-9572	The Automatic Neuroscientist: A Framework For Optimizing Experimental Design With Closed-loop Real-time Fmri	1960.87	TRUE	not applicable	unknown	cc-by	not applicable	hybrid	TRUE				103045/Z/13/Z
PMC5139986	27591921	10.1016/j.neuroimage.2016.08.058	Elsevier BV	NeuroImage	1053-8119, 1095-9572	Modelling confounding effects from extracerebral contamination and systemic factors on functional near-infrared spectroscopy	1976.46	TRUE	not applicable	unknown	cc-by	not applicable	hybrid	TRUE	Wellcome Trust
PMC4767223	26778128	10.1016/j.neuroimage.2015.12.054	Elsevier BV	NeuroImage	1053-8119, 1095-9572	Look but don't touch: Visual cues to surface structure drive somatosensory cortex	1992.8	TRUE	not applicable	unknown	cc-by	not applicable	hybrid	TRUE	Wellcome Trust	0	0	095183/Z/10/Z
PMC4819721	26778129	10.1016/j.neuroimage.2015.12.055	Elsevier BV	NeuroImage	1053-8119, 1095-9572	The status of the precommissural and postcommissural fornix in normal aging and mild cognitive impairment: an MRI tractography study	2003.68	TRUE	not applicable	unknown	cc-by	not applicable	hybrid	TRUE	Wellcome Trust	0	0	WT090954AIA	90954	208
PMC4819728	26806288	10.1016/j.neuroimage.2016.01.007	Elsevier BV	NeuroImage	1053-8119, 1095-9572	Task complexity and location specific changes of cortical thickness in executive and salience networks after working memory training.	2030.9	TRUE	not applicable	unknown	cc-by	not applicable	hybrid	TRUE	Wellcome Trust	0	0	502341
PMC5193177	27421184	10.1016/j.neuroimage.2016.07.027	Elsevier BV	NeuroImage	1053-8119, 1095-9572	Multi-center MRI prediction models: Predicting sex and illness course in first episode psychosis patients	2031.26	TRUE	not applicable	unknown	cc-by	not applicable	hybrid	TRUE	Wellcome Trust
PMC4819719	26826514	10.1016/j.neuroimage.2016.01.047	Elsevier BV	NeuroImage	1053-8119, 1095-9572	Including diffusion time dependence in the extra-axonal space improves in vivo estimates of axonal diameter and density in human white matter	2042.36	TRUE	not applicable	unknown	cc-by	not applicable	hybrid	TRUE	Wellcome Trust	0	0	639938
PMC4862957	26892854	10.1016/j.neuroimage.2016.02.025	Elsevier BV	NeuroImage	1053-8119, 1095-9572	Electrophysiological evidence for flexible goal-directed cue processing during episodic retrieval	2079.88	TRUE	not applicable	unknown	cc-by	not applicable	hybrid	TRUE	Wellcome Trust	0	0
PMC5056955	27262239	10.1016/j.neuroimage.2016.05.070	Elsevier BV	NeuroImage	1053-8119, 1095-9572	How reliable are MEG resting-state connectivity metrics?	2139.07	TRUE	not applicable	unknown	cc-by	not applicable	hybrid	TRUE	Wellcome Trust			MR/K005464/1	U54 MH091657	MR/M006301/1
PMC5035139	27288322	10.1016/j.neuroimage.2016.05.068	Elsevier BV	NeuroImage	1053-8119, 1095-9572	Faster permutation inference for brain imaging	2162.51	TRUE	not applicable	unknown	cc-by	not applicable	hybrid	TRUE	Wellcome Trust			G0900908	MR/J014257/2	R01 EB015611
PMC4988791	27349329	10.1016/j.neuroimage.2016.06.039	Elsevier BV	NeuroImage	1053-8119, 1095-9572	Automated segmentation of the substantia nigra, subthalamic nucleus and red nucleus in 7 T data at young and old age	2341.79	TRUE	not applicable	unknown	cc-by	not applicable	hybrid	TRUE	Wellcome Trust
PMC5102698	27417345	10.1016/j.neuroimage.2016.07.022	Elsevier BV	NeuroImage	1053-8119, 1095-9572	Improving effect size estimation and statistical power with multi-echo fMRI and its impact on understanding the neural systems supporting mentalizing.	2376.85	TRUE	not applicable	FALSE	cc-by	not applicable	hybrid	TRUE	wellcome-trust,	0	0
PMC5035138	27402600	10.1016/j.neuroimage.2016.07.018	Elsevier BV	NeuroImage	1053-8119, 1095-9572	BIANCA (Brain Intensity AbNormality Classification Algorithm)	2421.79	TRUE	not applicable	unknown	cc-by	not applicable	hybrid	TRUE	Wellcome Trust
PMC5035137	27444568	10.1016/j.neuroimage.2016.07.037	Elsevier BV	NeuroImage	1053-8119, 1095-9572	T1 relaxometry of crossing fibres in the human brain	2451.32	TRUE	not applicable	unknown	cc-by	not applicable	hybrid	TRUE	Wellcome Trust			639938
PMC5139985	27570110	10.1016/j.neuroimage.2016.08.054	Elsevier BV	NeuroImage	1053-8119, 1095-9572	High-resolution diffusion MRI at 7T using a Three-dimensional multi-slab acquisition	2488.47	TRUE	not applicable	unknown	cc-by	not applicable	hybrid	TRUE	Wellcome Trust
PMC4954868	27266443	10.1016/j.neuroimage.2016.05.075	Elsevier BV	NeuroImage	1053-8119, 1095-9572	Mindfulness training increases cooperative decision making in economic exchanges: Evidence from fMRI		TRUE	not applicable	unknown	cc-by	not applicable	hybrid	TRUE	Wellcome Trust			91593	R01 NS045790	R01 DA011723
PMC4907685	26956910	10.1016/j.neuroimage.2016.02.078	Elsevier BV	NeuroImage	1053-8119, 1095-9572	Computational modelling of movement-related beta-oscillatory dynamics in human motor cortex	1309	TRUE	not applicable	FALSE	cc-by-nc-nd	unknown	hybrid	FALSE	Wellcome Trust	MRC		91593	1406220
unknown	27153980	10.1016/j.neuroimage.2016.05.006	Elsevier BV	NeuroImage	1053-8119, 1095-9572	MEG sensor and source measures of visually induced gamma-band oscillations are highly reliable	2031.38	FALSE	FALSE	not applicable	unknown	unknown	hybrid	FALSE	Wellcome Trust (WELLCOME)
unknown	27554530	10.1016/j.neuroimage.2016.08.038	Elsevier BV	NeuroImage	1053-8119, 1095-9572	Deep brain stimulation of the periaqueductal gray releases endogenous opioids in humans	2233.43	FALSE	TRUE	not applicable	unknown	unknown	hybrid	FALSE	Wellcome Trust			88373
unknown	27639357	10.1016/j.neuroimage.2016.08.031	Elsevier BV	NeuroImage	1053-8119, 1095-9572	FUNCTIONAL SEGREGATION AND INTEGRATION WITHIN FRONTO-PARIETAL NETWORKS	2338.58	FALSE	TRUE	not applicable	unknown	unknown	hybrid	FALSE	Wellcome Trust
PMC4983151	27547729	10.1016/j.nicl.2016.07.010	Elsevier BV	NeuroImage. Clinical	2213-1582	Heterogeneity of trans-callosal structural connectivity and effects on resting state subnetwork integrity may underlie both wanted and unwanted effects of therapeutic corpus callostomy	1376.46	TRUE	not applicable	unknown	cc-by	not applicable	oa	TRUE	Wellcome Trust			U54 MH091657
PMC5031471	27689019	10.1016/j.nicl.2016.09.002	Elsevier BV	NeuroImage. Clinical	2213-1582	Volumetric, relaxometric and diffusometric correlates of psychotic experiences in a non-clinical sample of young adults.	1441.34	TRUE	not applicable	unknown	cc-by	not applicable	oa	TRUE	Wellcome Trust			G0901885
PMC4742537	26844833	10.1016/j.neuron.2016.01.015	Elsevier BV	Neuron	0896-6273, 1097-4199	Breastfeeding, pregnant, and non-breastfeeding nor pregnant women's food consumption: A matched within-household analysis in India	1995.97	TRUE	not applicable	unknown	cc-by	not applicable	hybrid	TRUE	Wellcome Trust			102386/Z/13/Z	086362/Z/08/Z	1375397
PMC4622934	26494277	10.1016/j.neuron.2015.09.043	Elsevier BV	Neuron	0896-6273, 1097-4199	Time-resolved imaging reveals heterogeneous landscapes of nanomolar Ca2+ in neurons and astroglia	3267.68	TRUE	not applicable	unknown	cc-by	not applicable	hybrid	TRUE	Wellcome Trust	BBSRC		unknown	101896	95064
PMC4961224	27346532	10.1016/j.neuron.2016.05.041	Elsevier BV	Neuron	0896-6273, 1097-4199	Input-specific gain modulation by local sensory context shapes cortical and thalamic responses to complex sounds	3423.02	TRUE	not applicable	unknown	cc-by	not applicable	hybrid	TRUE	Wellcome Trust	EPSRC
PMC4882376	27161527	10.1016/j.neuron.2016.04.013	Elsevier BV	Neuron	0896-6273, 1097-4199	Conditional Spike Transmission Mediated by Electrical Coupling Ensures Millisecond Precision-Correlated Activity among Interneurons In Vivo	3424.96	TRUE	not applicable	unknown	cc-by	not applicable	hybrid	TRUE	Wellcome Trust
PMC4826437	27021173	10.1016/j.neuron.2016.02.034	Elsevier BV	Neuron	0896-6273, 1097-4199	Millisecond coupling of local field potentials to synaptic currents in the awake visual cortex	3476.33	TRUE	not applicable	unknown	cc-by	not applicable	hybrid	TRUE	Wellcome Trust			unknown
PMC4942698	27321922	10.1016/j.neuron.2016.05.028	Elsevier BV	Neuron	0896-6273, 1097-4199	Fast sequences of non-spatial state representations in humans	3507.32	TRUE	not applicable	unknown	cc-by	not applicable	hybrid	TRUE	Wellcome Trust			91593	98362
PMC4893164	27133465	10.1016/j.neuron.2016.03.029	Elsevier BV	Neuron	0896-6273, 1097-4199	Functional properties of dendritic gap junctions in cerebellar Golgi cells	3514.08	TRUE	not applicable	unknown	cc-by	not applicable	hybrid	TRUE	Wellcome Trust			249667
PMC4893161	27210554	10.1016/j.neuron.2016.04.046	Elsevier BV	Neuron	0896-6273, 1097-4199	The dynamic localization of cytoplasmic dynein in neurons is driven by kinesin-1	3728.99	TRUE	not applicable	unknown	cc-by	not applicable	hybrid	TRUE	Wellcome Trust			R01 GM048661
PMC4660210	26526393	10.1016/j.neuron.2015.10.030	Elsevier BV	Neuron	0896-6273, 1097-4199	ALS/FTD Mutation-Induced Phase Transition of FUS Liquid Droplets and Reversible Hydrogels into Irreversible Hydrogels Impairs RNP Granule Function.	3936.52	TRUE	not applicable	unknown	cc-by	not applicable	hybrid	TRUE	erc, mrc, nih, nihr, wellcome-trust, Canadian Institutes of Health Research, epsrc, fp7	0	0	unknown	100140	89703
PMC4893166	27210550	10.1016/j.neuron.2016.04.034	Elsevier BV	Neuron	0896-6273, 1097-4199	Aversive learning and appetitive motivation	4136.28	TRUE	not applicable	unknown	cc-by	not applicable	hybrid	TRUE	Wellcome Trust			90924
PMC4826438	26996082	10.1016/j.neuron.2016.02.031	Elsevier BV	Neuron	0896-6273, 1097-4199	Unmasking latent inhibitory connections in human cortex to reveal dormant cortical memories	4168.48	TRUE	not applicable	unknown	cc-by	not applicable	hybrid	TRUE	Wellcome Trust	Wellcome Trust	Wellcome Trust	104128/Z/14/Z	WT100000	WT088312AIA
PMC4826429	26971947	10.1016/j.neuron.2016.02.018	Elsevier BV	Neuron	0896-6273, 1097-4199	Reward-guided learning with and without causal attribution	4216.38	TRUE	not applicable	unknown	cc-by	not applicable	hybrid	TRUE	Wellcome Trust	Wellcome Trust	Wellcome Trust	WT088312AIA	WT090051MA	WT104765MA
PMC4893165	27181060	10.1016/j.neuron.2016.04.019	Elsevier BV	Neuron	0896-6273, 1097-4199	Adaptive Prediction Error Coding in the Human Midbrain and Striatum Facilitates Behavioral Adaptation and Learning Efficiency.	4262.28	TRUE	not applicable	FALSE	cc-by	not applicable	hybrid	TRUE	wellcome-trust,	0	0	93875
PMC4819449	26948895	10.1016/j.neuron.2016.02.014	Elsevier BV	Neuron	0896-6273, 1097-4199	Two computationally and anatomically distinct learning signals predict changes to stimulus-outcome associations in hippocampus	4456.39	TRUE	not applicable	unknown	cc-by	not applicable	hybrid	TRUE	Wellcome Trust			WT088977MF	WT104765MA	91593
PMC4980426	27427461	10.1016/j.neuron.2016.06.031	Elsevier BV	Neuron	0896-6273, 1097-4199	Selective Inhibition Mediates the Sequential Recruitment of Motor Pools.	4488.29	TRUE	not applicable	FALSE	cc-by	not applicable	hybrid	TRUE	wellcome-trust, HHMI Janelia Visitor Program, Howard Hughes Medical Institute, Isaac Newton Trust/ISSF Wellcome Trust scheme	0	0
PMC4961240	27477020	10.1016/j.neuron.2016.06.022	Elsevier BV	Neuron	0896-6273, 1097-4199	Self-Other Mergence in the Frontal Cortex during Cooperation and Competition.	4503.42	TRUE	not applicable	unknown	cc-by	not applicable	hybrid	TRUE	Wellcome Trust
PMC4655865	26192543	10.1016/j.neuropharm.2015.07.018	Elsevier BV	Neuropharmacology	0028-3908, 1873-7064	Neurovascular and neuroimaging effects of the hallucinogenic serotonin receptor agonist psilocin in the rat brain	1660.98	TRUE	not applicable	unknown	cc-by	not applicable	hybrid	TRUE	The Wellcome Trust			WT085523MA	WT093223AIA	16945
PMC4920643	27108935	10.1016/j.neuropharm.2016.04.027	Elsevier BV	Neuropharmacology	0028-3908, 1873-7064	The muscarinic antagonists scopolamine and atropine are competitive antagonists at 5-HT3 receptors.	2000.25	TRUE	not applicable	FALSE	cc-by	not applicable	hybrid	TRUE	british-heart-foundation,	0	0	PG/13/39/30293
PMC4920646	27085605	10.1016/j.neuropharm.2016.04.016	Elsevier BV	Neuropharmacology	0028-3908, 1873-7064	Role for Serotonin2A (5-HT2A) and 2C (5-HT2C) Receptors in Experimental Absence Seizures	2051.66	TRUE	not applicable	unknown	cc-by	not applicable	hybrid	TRUE	Wellcome Trust	0	0	P1202
	27216859	10.1016/j.neuropharm.2016.05.013	Elsevier BV	Neuropharmacology	0028-3908, 1873-7064	Multi-facetted impulsivity following nigral degeneration and dopamine replacement therapy.	1955.81	FALSE	FALSE	not applicable	unknown	unknown	hybrid	FALSE	wellcome-trust,	0	0	93875
PMC4617475	26232744	10.1016/j.neuropsychologia.2015.07.027	Elsevier BV	Neuropsychologia	0028-3932, 1873-3514	Infant VEPs reveal neural correlates of implicit naming: Lateralized differences between lexicalized versus name-unknown pictures	1403.38	TRUE	not applicable	unknown	cc-by	not applicable	hybrid	TRUE	Wellcome Trust			084386/Z/07/Z
PMC4749539	26748236	10.1016/j.neuropsychologia.2015.12.031	Elsevier BV	Neuropsychologia	0028-3932, 1873-3514	Processing emotion from abstract art in frontotemporal lobar degeneration	1568.74	TRUE	not applicable	unknown	cc-by	not applicable	hybrid	TRUE	Wellcome Trust/Arthritis Research UK	MRC/EPSRC/ESRC		091673/Z/10/Z	91673	1332624
PMC4749538	26731199	10.1016/j.neuropsychologia.2015.12.028	Elsevier BV	Neuropsychologia	0028-3932, 1873-3514	Transcranial random noise stimulation mitigates increased difficulty in an arithmetic learning task	1628.85	TRUE	not applicable	unknown	cc-by	not applicable	hybrid	TRUE	Wellcome Trust			WT88378
PMC4863527	26945505	10.1016/j.neuropsychologia.2016.02.030	Elsevier BV	Neuropsychologia	0028-3932, 1873-3514	The role of the right hemisphere in semantic control: A case-series comparison of right and left hemisphere stroke	1696.21	TRUE	not applicable	unknown	cc-by	not applicable	hybrid	TRUE	Wellcome Trust	0	0	283530
PMC4915335	27150704	10.1016/j.neuropsychologia.2016.05.001	Elsevier BV	Neuropsychologia	0028-3932, 1873-3514	Audience effects on the neural correlates of relational reasoning in adolescence	1757.28	TRUE	not applicable	unknown	cc-by	not applicable	hybrid	TRUE	Wellcome Trust
PMC4915336	27143222	10.1016/j.neuropsychologia.2016.04.028	Elsevier BV	Neuropsychologia	0028-3932, 1873-3514	Cathodal transcranial direct current stimulation over posterior parietal cortex enhances distinct aspects of visual working memory	1813.26	TRUE	not applicable	unknown	cc-by	not applicable	hybrid	TRUE	Wellcome Trust
PMC4907126	27126840	10.1016/j.neuropsychologia.2016.04.022	Elsevier BV	Neuropsychologia	0028-3932, 1873-3514	Modulation of linguistic prediction by TDCS of the right lateral cerebellum	1818.49	TRUE	not applicable	unknown	cc-by	not applicable	hybrid	TRUE	Wellcome Trust	0	0
PMC5010040	27431039	10.1016/j.neuropsychologia.2016.07.016	Elsevier BV	Neuropsychologia	0028-3932, 1873-3514	Goal-directed mechanisms that constrain retrieval predict subsequent memory for new "foil" information.	1942.77	TRUE	not applicable	FALSE	cc-by	not applicable	hybrid	TRUE	mrc, wellcome-trust, James S. McDonnell Foundation	0	0	93875	G1000183B	G1000183
unknown	26116910	10.1016/j.neuropsychologia.2015.06.032	Elsevier BV	Neuropsychologia	0028-3932, 1873-3514	Voluntary control of a phantom limb	1515.6	FALSE	FALSE	not applicable	unknown	unknown	hybrid	FALSE	Wellcome Trust	ESRC		WT087070MA	RES-000-23-1571
PMC4675086	26515746	10.1016/j.neuroscience.2015.10.035	Elsevier BV	Neuroscience	0306-4522, 1873-7544	The role of different strain backgrounds in bacterial endotoxin-mediated sensitization to neonatal hypoxic-ischaemic brain damage	1710.96	TRUE	not applicable	unknown	cc-by	not applicable	hybrid	TRUE	Wellcome Trust			WT088646MA	WT089624MA	RG1266
PMC4771015	26808775	10.1016/j.neuroscience.2016.01.034	Elsevier BV	Neuroscience	0306-4522, 1873-7544	The role of TWEAK/Fn14 signalling in the MPTP-model of Parkinson's disease	1788.81	TRUE	not applicable	unknown	cc-by	not applicable	hybrid	TRUE				WT080782MF
PMC4915440	27185486	10.1016/j.neuroscience.2016.05.009	Elsevier BV	Neuroscience	0306-4522, 1873-7544	Immunostaining for Homer reveals the majority of excitatory synapses in laminae I-III of the mouse spinal dorsal horn	1815.34	TRUE	not applicable	unknown	cc-by	not applicable	hybrid	TRUE	Wellcome Trust (WELLCOME)	Medical Research Council (MRC)		MR/L003430/1
PMC4936792	27233617	10.1016/j.neuroscience.2016.05.030	Elsevier BV	Neuroscience	0306-4522, 1873-7544	Comparable reduction in Zif268 levels and cytochrome oxidase activity in the retrosplenial cortex following mammillothalamic tract lesions	1895.66	TRUE	not applicable	unknown	cc-by	not applicable	hybrid	TRUE	Wellcome Trust	0	0
PMC4819727	26876605	10.1016/j.neuroscience.2016.02.017	Elsevier BV	Neuroscience	0306-4522, 1873-7544	Early development of synchrony in cortical activations in the human	1905.47	TRUE	not applicable	unknown	cc-by	not applicable	hybrid	TRUE	Wellcome Trust			339804
PMC4996646	27393249	10.1016/j.neuroscience.2016.06.050	Elsevier BV	Neuroscience	0306-4522, 1873-7544	Oxidative stress in the development, maintenance and resolution of paclitaxel-induced painful neuropathy	1914.32	TRUE	not applicable	unknown	cc-by	not applicable	hybrid	TRUE	Wellcome Trust
PMC4884665	27109924	10.1016/j.neuroscience.2016.04.020	Elsevier BV	Neuroscience	0306-4522, 1873-7544	Preliminary evidence for human globus pallidus pars interna neurons signaling reward and sensory stimuli.	1949.14	TRUE	not applicable	FALSE	cc-by	not applicable	hybrid	TRUE	wellcome-trust,	0	0	93875
unknown	27522961	10.1016/j.neuroscience.2016.08.008	Elsevier BV	Neuroscience	0306-4522, 1873-7544	Effects of lesions of the subthalamic nucleus/zona incerta area and dorsomedial striatum on attentional set-shifting in the rat	2248.49	FALSE	TRUE	not applicable	unknown	unknown	hybrid	FALSE	Wellcome Trust	0	0
PMC5103027	27039344	10.1016/j.neubiorev.2016.03.026	Elsevier BV	Neuroscience and biobehavioral reviews	0149-7634, 1873-7528	Structural and functional neural adaptations in obstructive sleep apnea: an activation likelihood estimation meta-analysis	2669.78	TRUE	not applicable	unknown	cc-by	not applicable	hybrid	TRUE	Wellcome Trust
PMC4899514	27126289	10.1016/j.neubiorev.2016.03.031	Elsevier BV	Neuroscience and biobehavioral reviews	0149-7634, 1873-7528	Noradrenaline effects on social behaviour, intergroup relations, and moral decisions	2907.06	TRUE	not applicable	unknown	cc-by	not applicable	hybrid	TRUE	Wellcome Trust			86041
PMC4683096	26520460	10.1016/j.neulet.2015.10.052	Elsevier BV	Neuroscience letters	0304-3940, 1872-7972	The contribution of TRPC1, TRPC3, TRPC5 and TRPC6 to touch and hearing	1536.58	TRUE	not applicable	unknown	cc-by	not applicable	hybrid	TRUE	Wellcome Trust	MRC		unknown	101054	1095103
PMC4762229	26777626	10.1016/j.neulet.2016.01.007	Elsevier BV	Neuroscience letters	0304-3940, 1872-7972	Brain structural changes in women and men during midlife.	1565.5	TRUE	not applicable	unknown	cc-by	not applicable	hybrid	TRUE	mrc, wellcome-trust,	0	0	093875/Z/10Z	93875	G0001354
PMC4819890	26880023	10.1016/j.neuro.2016.02.006	Elsevier BV	Neurotoxicology	0161-813X, 1872-9711	Associations between prenatal mercury exposure and early child development in the ALSPAC study	2637.04	TRUE	not applicable	unknown	cc-by	not applicable	hybrid	TRUE	MRC	Wellcome Trust		104077/Z/14/Z	102215/2/13/2	102215
PMC4888939	27275004	10.1016/j.nhtm.2016.03.001	Elsevier BV	New horizons in translational medicine	2352-7536, 2307-5023	Translational aspects in targeting the tumour microenvironment: from bench to bedside	1768.81	TRUE	not applicable	TRUE	unknown	unknown	hybrid	FALSE	Cancer Research UK	0	0	A20526	1819
PMC5045922	27350118	10.1016/j.niox.2016.06.006	Elsevier BV	Nitric oxide : biology and chemistry	1089-8603, 1089-8611	In vivo pharmacological activity and biodistribution of S-Nitrosophytochelatins after intravenous and intranasal administration in mice	2871.59	TRUE	not applicable	unknown	cc-by	not applicable	hybrid	TRUE	British Heart Foundation
PMC4844163	27101764	10.1016/j.nutres.2015.12.016	Elsevier BV	Nutrition research (New York, N.Y.)	0271-5317, 1879-0739	High compliance with dietary recommendations in a cohort of meat eaters, fish eaters, vegetarians, and vegans: results from the European Prospective Investigation into Cancer and Nutrition - Oxford study	1415.93	TRUE	not applicable	unknown	cc-by	not applicable	hybrid	TRUE	Cancer Research UK	Cancer Research UK	MRC	C570/A11691	MR/M012190/1	C8221/A19170
PMC4987462	27052923	10.1016/j.numecd.2016.01.003	Elsevier BV	Nutrition, metabolism, and cardiovascular diseases : NMCD	0939-4753, 1590-3729	Habitual chocolate consumption and the risk of incident heart failure among healthy men and women	2817.41	TRUE	not applicable	unknown	cc-by	not applicable	hybrid	TRUE	cancer-research-uk, mrc,
PMC4819446	26795295	10.1016/j.ophtha.2015.11.031	Elsevier BV	Ophthalmology	0161-6420, 1549-4713	Associations with intraocular pressure in a large cohort: the UK Biobank	1944	TRUE	not applicable	unknown	cc-by	not applicable	hybrid	TRUE	Wellcome Trust/British Heart Foundation	MRC		094791/Z/10/Z	93707	BRC2_009
PMC5081072	27538797	10.1016/j.ophtha.2016.07.009	Elsevier BV	Ophthalmology	0161-6420, 1549-4713	Prospective study of the diagnostic accuracy of the in Vivo laser scanning confocal microscope for severe microbial keratitis.	2266.99	TRUE	not applicable	unknown	cc-by	not applicable	hybrid	TRUE	Wellcome Trust
PMC4994575	27406115	10.1016/j.ophtha.2016.05.042	Elsevier BV	Ophthalmology	0161-6420, 1549-4713	First prospective cohort study of diabetic retinopathy from Sub-Saharan Africa	2485.63	TRUE	not applicable	unknown	cc-by	not applicable	hybrid	TRUE	Wellcome Trust
PMC4994968	27594929	10.1016/j.mporth.2016.04.015	Elsevier BV	Orthopaedics and trauma	1877-1327, 1877-1335	Biomechanics of the ankle	2523.62	TRUE	not applicable	unknown	cc-by	not applicable	hybrid	TRUE	Wellcome Trust	EPSRC	0
PMC4921687	27418950	10.1016/j.mporth.2016.03.006	Elsevier BV	Orthopaedics and trauma	1877-1327, 1877-1335	The multidisciplinary management of hip fractures in older patients	2955.35	TRUE	not applicable	unknown	cc-by	not applicable	hybrid	TRUE
PMC5009895	27208420	10.1016/j.joca.2016.05.015	Elsevier BV	Osteoarthritis and cartilage	1063-4584, 1522-9653	The anti-NGF antibody muMab 911 both prevents and reverses pain behaviour and subchondral osteoclast numbers in a rat model of osteoarthritis pain	1125.67	TRUE	not applicable	unknown	cc-by	not applicable	hybrid	TRUE	Arthritis Research UK	Other	0
PMC4850243	26746149	10.1016/j.joca.2015.12.015	Elsevier BV	Osteoarthritis and cartilage	1063-4584, 1522-9653	Influences on the decision to use an osteoarthritis diagnosis in primary care: a cohort study with linked survey and electronic health record data	1543.83	TRUE	not applicable	unknown	cc-by	not applicable	hybrid	TRUE	ARUK	MRC		18175	2008 IPF PORCHERET	RP-PG-0407-10386
PMC4819451	26585242	10.1016/j.joca.2015.11.007	Elsevier BV	Osteoarthritis and cartilage	1063-4584, 1522-9653	Importance of reference gene selection for articular cartilage mechanobiology studies.	1761.59	TRUE	not applicable	unknown	cc-by	not applicable	hybrid	TRUE	Arthritis Research UK	0	0	18461
PMC5081689	27374878	10.1016/j.joca.2016.06.015	Elsevier BV	Osteoarthritis and cartilage	1063-4584, 1522-9653	Differential effects of altered patterns of movement and strain on joint cell behaviour and skeletal morphogenesis	1859	TRUE	not applicable	unknown	cc-by	not applicable	hybrid	TRUE	Wellcome Trust	MRC	Arthritis Research UK	MR/L002566/1
PMC4967444	27038489	10.1016/j.joca.2016.03.015	Elsevier BV	Osteoarthritis and cartilage	1063-4584, 1522-9653	Synovial volume vs synovial measurements from dynamic contrast enhanced MRI as measures of response in osteoarthritis.	1903.07	TRUE	not applicable	unknown	cc-by	not applicable	hybrid	TRUE
PMC5081684	27349460	10.1016/j.joca.2016.06.012	Elsevier BV	Osteoarthritis and cartilage	1063-4584, 1522-9653	Relationship between structual pathology and pain behaviour in a model of osteoarthritis	2031.1	TRUE	not applicable	unknown	cc-by	not applicable	hybrid	TRUE	Arthritis Research UK	0	0
PMC4989048	26973327	10.1016/j.joca.2016.03.007	Elsevier BV	Osteoarthritis and cartilage	1063-4584, 1522-9653	Gene expression changes in damaged osteoarthritic cartilage identify a signature of non-chondrogenic and mechanical responses.	2355.66	TRUE	not applicable	unknown	cc-by	not applicable	hybrid	TRUE				20414
PMC4967443	26973325	10.1016/j.joca.2016.03.004	Elsevier BV	Osteoarthritis and cartilage	1063-4584, 1522-9653	Synovial changes detected by ultrasound in people with knee osteoarthritis - a meta-analysis of observational studies	1945.48	TRUE	not applicable	FALSE	cc-by-nc-nd	unknown	hybrid	FALSE	Arthritis Research UK	Other	0
PMC5123629	27288147	10.1016/j.pan.2016.05.393	Elsevier BV	Pancreatology : official journal of the International Association of Pancreatology (IAP) ... [et al.]	1424-3903, 1424-3911	Pancreatic stellate cells regulate blood vessel density in the stroma of pancreatic ductal adenocarcinoma.	2536.43	TRUE	not applicable	unknown	cc-by	not applicable	hybrid	TRUE
PMC4671992	26578039	10.1016/j.parkreldis.2015.10.019	Elsevier BV	Parkinsonism & related disorders	1353-8020, 1873-5126	Small fiber neuropathy in Parkinson's disease: A clinical, pathological and corneal confocal microscopy study.	1918.62	TRUE	not applicable	unknown	cc-by	not applicable	hybrid	TRUE				K-1301
PMC4906150	27094482	10.1016/j.parkreldis.2016.04.009	Elsevier BV	Parkinsonism & related disorders	1353-8020, 1873-5126	Cognitive decline and quality of life in incident Parkinson's disease: The role of attention	2293.55	TRUE	not applicable	unknown	cc-by	not applicable	hybrid	TRUE	Parkinsons UK
PMC4925465	27210815	10.1016/j.parkreldis.2016.05.013	Elsevier BV	Parkinsonism & related disorders	1353-8020, 1873-5126	Co-morbidity burden in ParkinsonÂ’s disease: Comparison with controls and its influence on prognosis	2541.12	TRUE	not applicable	unknown	cc-by	not applicable	hybrid	TRUE				G-0914
PMC5110002	27553511	10.1016/j.parkreldis.2016.08.010	Elsevier BV	Parkinsonism & related disorders	1353-8020, 1873-5126	Medium-term prognosis of an incident cohort of parkinsonian patients compared to controls	2685.74	TRUE	not applicable	FALSE	cc-by-nc-nd	unknown	hybrid	FALSE	Parkinson's UK, Charities Fund			G-0914
PMC4889782	26896569	10.1016/j.peptides.2016.02.004	Elsevier BV	Peptides	0196-9781, 1873-5169	The corticotropin-releasing factor-like diuretic hormone 44 (DH44) and kinin neuropeptides modulate desiccation and starvation tolerance in Drosophila melanogaster	2503.62	TRUE	not applicable	unknown	cc-by	not applicable	hybrid	TRUE	Wellcome Trust (WELLCOME)			096987/Z/11/Z	R01 GM084947	BB/L002647/1
PMC4788717	26541888	10.1016/j.peptides.2015.10.008	Elsevier BV	Peptides	0196-9781, 1873-5169	The effect of encapsulated glutamine on gut peptide secretion in human volunteers.	2504.4	TRUE	not applicable	unknown	cc-by	not applicable	hybrid	TRUE	wellcome-trust, & EU FP7	0	0	WT084210/Z/07/Z	WT088357/Z/09/Z	100574
PMC4773404	26687096	10.1016/j.phrs.2015.12.008	Elsevier BV	Pharmacological research	1043-6618, 1096-1186	Activation of a synapse weakening pathway by human Val66 but not Met66 pro-brain-derived neurotrophic factor (proBDNF)	2434.2	TRUE	not applicable	unknown	cc-by	not applicable	hybrid	TRUE	MRC	Wellcome Trust		unknown	106	BB/N001893/1
PMC4876767	26995304	10.1016/j.phrs.2016.03.013	Elsevier BV	Pharmacological research	1043-6618, 1096-1186	SRPK1 inhibition in prostate cancer: a novel anti-angiogenic treatment through modulation of VEGF alternative splicing	2677.62	TRUE	not applicable	FALSE	cc-by	not applicable	hybrid	TRUE	British Heart Foundation
PMC4667215	26481155	10.1016/j.pharmthera.2015.10.005	Elsevier BV	Pharmacology & therapeutics	0163-7258, 1879-016X	ParkinsonÂ’s disease proteins: Novel mitochondrial targets for cardioprotection	2132.05	TRUE	not applicable	unknown	cc-by	not applicable	hybrid	TRUE	British Heart Foundation	MRC		MR/J003530/1	FS/09/060/28039
PMC5243145	27373854	10.1016/j.pharmthera.2016.06.017	Elsevier BV	Pharmacology & therapeutics	0163-7258, 1879-016X	From bones to blood pressure, developing novel biologic approaches targeting the osteoprotegein pathway for pulmonary vascular disease	3202.21	TRUE	FALSE	FALSE	cc-by	not applicable	hybrid	TRUE	British Heart Foundation
PMC5109899	27519803	10.1016/j.pharmthera.2016.07.013	Elsevier BV	Pharmacology & therapeutics	0163-7258, 1879-016X	The therapeutic potential of epigenetic manipulation during infectious diseases	3215.66	TRUE	not applicable	unknown	cc-by	not applicable	hybrid	TRUE	The Wellcome Trust
PMC4959264	27137078	10.1016/j.physbeh.2016.04.044	Elsevier BV	Physiology & behavior	0031-9384, 1873-507X	The Effect of Heightened Awareness of Observation on Consumption of a Multi-Item Laboratory Test Meal in Females	2033.36	TRUE	not applicable	unknown	cc-by	not applicable	hybrid	TRUE	Wellcome Trust
PMC4721537	26612342	10.1016/j.placenta.2015.10.022	Elsevier BV	Placenta	0143-4004, 1532-3102	Abnormal uterine artery remodelling in the stroke prone spontaneously hypertensive rat	2453.77	TRUE	not applicable	unknown	cc-by	not applicable	hybrid	TRUE	Medical Research Council (MRC)	British Heart Foundation (BHF)		1521437	MR/J50032X/1	FS/12/66/30003
PMC5063007	27697225	10.1016/j.placenta.2016.08.076	Elsevier BV	Placenta	0143-4004, 1532-3102	Placental vascularity and markers of angiogenesis in relation to prenatal growth status in overnourished adolescent ewes	2498.23	TRUE	not applicable	unknown	cc-by	not applicable	hybrid	TRUE	Wellcome Trust
PMC4502406	25956988	10.1016/j.placenta.2015.04.005	Elsevier BV	Placenta	0143-4004, 1532-3102	Hypoxia is an effective stimulus for vesicular release of ATP from human umbilical vein endothelial cells	2350.54	TRUE	not applicable	unknown	cc-by-nc-nd	unknown	hybrid	FALSE	British Heart Foundation	0	0	FS/07/055/23594
PMC4678256	26441297	10.1016/j.ypmed.2015.09.022	Elsevier BV	Preventive medicine	0091-7435, 1096-0260	Quantifying the physical activity energy expenditure of commuters using a combination of global positioning system and combined heart rate and movement sensors.	1739.1	TRUE	not applicable	unknown	cc-by	not applicable	hybrid	TRUE	mrc, nihr, BHF, ESRC, Wellcome Trust	0	0	09/3001/06	ES/G007462/1	MC_U106179473
PMC4976831	27261410	10.1016/j.ypmed.2016.05.031	Elsevier BV	Preventive medicine	0091-7435, 1096-0260	Objectively measured physical activity, sedentary time and subclinical vascular disease: Cross-sectional study in older British men	1839.66	TRUE	not applicable	unknown	cc-by	not applicable	hybrid	TRUE	British Heart Foundation
PMC4766368	26740344	10.1016/j.ypmed.2015.12.010	Elsevier BV	Preventive medicine	0091-7435, 1096-0260	Longitudinal associations of active commuting with wellbeing and sickness absence.	1886.34	TRUE	not applicable	unknown	cc-by	not applicable	hybrid	TRUE	british-heart-foundation, cancer-research-uk, esrc, mrc, nihr, wellcome-trust,	0	0	unknown	09/3001/06	ES/G007462/1
PMC4893020	26946367	10.1016/j.ypmed.2016.02.042	Elsevier BV	Preventive medicine	0091-7435, 1096-0260	Causal pathways linking environmental change with health behaviour change: Natural experimental study of new transport infrastructure and cycling to work.	1987.26	TRUE	not applicable	FALSE	cc-by	not applicable	hybrid	TRUE	british-heart-foundation, cancer-research-uk, esrc, mrc, nihr, wellcome-trust,	0	0
PMC4893018	27156248	10.1016/j.ypmed.2016.02.002	Elsevier BV	Preventive medicine	0091-7435, 1096-0260	Can air pollution negate the health benefits of cycling and walking?	1992.19	TRUE	not applicable	unknown	cc-by	not applicable	hybrid	TRUE	british-heart-foundation, cancer-research-uk, esrc, mrc, nihr, wellcome-trust,	0	0
PMC4893019	26940254	10.1016/j.ypmed.2016.02.040	Elsevier BV	Preventive medicine	0091-7435, 1096-0260	Identifying correlates and determinants of physical activity in youth: How can we advance the field?	1992.96	TRUE	not applicable	FALSE	cc-by	not applicable	hybrid	TRUE	british-heart-foundation, cancer-research-uk, esrc, mrc, nihr, wellcome-trust,	0	0	MC_UU_12015/7
PMC4893017	26921657	10.1016/j.ypmed.2016.02.034	Elsevier BV	Preventive medicine	0091-7435, 1096-0260	Evaluating the impact of a community-based cancer awareness roadshow on awareness, attitudes and behaviors.	2008.54	TRUE	not applicable	unknown	cc-by	not applicable	hybrid	TRUE
PMC4976834	27212071	10.1016/j.ypmed.2016.05.010	Elsevier BV	Preventive medicine	0091-7435, 1096-0260	Food insecurity and social protection in Europe: quasi-natural experiment of Europe's Great Recessions 2004-2012	2012.78	TRUE	not applicable	unknown	cc-by	not applicable	hybrid	TRUE	Wellcome Trust
unknown	26656405	10.1016/j.ypmed.2015.11.029	Elsevier BV	Preventive medicine	0091-7435, 1096-0260	Adverse associations of car time with markers of cardio-metabolic risk.	1928.52	FALSE	FALSE	not applicable	unknown	unknown	hybrid	FALSE	british-heart-foundation, (See manuscript - there's about a page of Australia-specific funders)	0	0	FS/12/58/29709	MC_UU_12015/3	MC_U106179473
PMC4929125	27413656	10.1016/j.pmedr.2016.05.006	Elsevier BV	Preventive medicine reports	2211-3355	Age-related patterns of vigorous-intensity physical activity in youth: The International Children's Accelerometry Database.	957.73	TRUE	not applicable	FALSE	cc-by	not applicable	oa	TRUE	british-heart-foundation, cancer-research-uk, esrc, mrc, nihr, wellcome-trust,	0	0	MC_UU_12015/7	MC_UU_12015/3
PMC4959513	27320383	10.1016/j.pbiomolbio.2016.06.001	Elsevier BV	Progress in biophysics and molecular biology	0079-6107, 1873-1732	Mapping cardiac microstructure of rabbit heart in different mechanical states by high resolution diffusion tensor imaging: A proof-of-principle study	850.56	TRUE	not applicable	unknown	cc-by	not applicable	hybrid	TRUE	Wellcome Trust	EPSRC	BBSRC	BB/I012117/1	PG/13/33/30210	FS/12/17/29532
PMC4821179	26701222	10.1016/j.pbiomolbio.2015.12.002	Elsevier BV	Progress in biophysics and molecular biology	0079-6107, 1873-1732	Variability in cardiac electrophysiology: Using experimentally-calibrated populations of models to move beyond the single virtual physiological human paradigm	2642.69	TRUE	not applicable	unknown	cc-by	not applicable	hybrid	TRUE	Wellcome Trust			100246/Z/12/Z	100246	984966
PMC5067302	27208698	10.1016/j.pbiomolbio.2016.05.003	Elsevier BV	Progress in biophysics and molecular biology	0079-6107, 1873-1732	Rabbit models of cardiac mechano-electric and mechano-mechanical coupling	2703.44	TRUE	not applicable	unknown	cc-by	not applicable	hybrid	TRUE				FS/12/17/29532
PMC4959512	27210305	10.1016/j.pbiomolbio.2016.05.005	Elsevier BV	Progress in biophysics and molecular biology	0079-6107, 1873-1732	Electron tomography of rabbit cardiomyocyte three-dimensional ultrastructure	2703.44	TRUE	not applicable	unknown	cc-by	not applicable	hybrid	TRUE				FS/15/3/31047	FS/12/17/29532
PMC4821233	26850675	10.1016/j.pbiomolbio.2016.01.008	Elsevier BV	Progress in biophysics and molecular biology	0079-6107, 1873-1732	Early afterdepolarizations promote transmural reentry in ischemic human ventricles with reduced repolarization reserve	2740.65	TRUE	not applicable	unknown	cc-by	not applicable	hybrid	TRUE	Wellcome Trust			100246/Z/12/Z	MOP 142424
PMC4821177	26713555	10.1016/j.pbiomolbio.2015.12.007	Elsevier BV	Progress in biophysics and molecular biology	0079-6107, 1873-1732	Mechano-electric Heterogeneity Of The Myocardium As A Paradigm Of Its Function	2565.54	TRUE	not applicable	unknown	cc-by-nc-nd	unknown	hybrid	FALSE				FS/12/17/29532
unknown	27320382	10.1016/j.pbiomolbio.2016.06.003	Elsevier BV	Progress in biophysics and molecular biology	0079-6107, 1873-1732	Rabbit-specific computational modelling of ventricular cell electrophysiology: Using populations of models to explore variability in the response to ischemia	3223.03	FALSE	FALSE	not applicable	unknown	unknown	hybrid	FALSE	Wellcome Trust
PMC4779150	26365173	10.1016/j.pneurobio.2015.09.001	Elsevier BV	Progress in neurobiology	0301-0082, 1873-5118	Active Inference, homeostatic regulation and adaptive behavioural control	2279.11	TRUE	not applicable	unknown	cc-by	not applicable	hybrid	TRUE	Wellcome Trust			088130/Z/09/Z	91593	88130
PMC4854174	26923176	10.1016/j.preteyeres.2016.02.003	Elsevier BV	Progress in retinal and eye research	1350-9462, 1873-1635	NRP1 function and targeting in neurovascular development and eye disease	2676.21	TRUE	not applicable	unknown	cc-by	not applicable	hybrid	TRUE	British Heart Foundation/Wellcome Trust			FS/13/35/30148
PMC4995348	27458998	10.1016/j.protis.2016.06.003	Elsevier BV	Protist	1434-4610, 1618-0941	Transcripts in the Plasmodium Apicoplast Undergo Cleavage at tRNAs and Editing, and Include Antisense Sequences.	2314.89	TRUE	not applicable	FALSE	cc-by	not applicable	hybrid	TRUE	wellcome-trust,	0	0
PMC4693450	26619915	10.1016/j.psychres.2015.11.007	Elsevier BV	Psychiatry research	0165-1781, 1872-7123	Feedback training induces a bias for detecting happiness or fear in facial expressions that generalises to a novel task	1899.02	TRUE	not applicable	unknown	cc-by	not applicable	hybrid	TRUE	British Heart Foundation	Cancer Research UK		MC_UU_12013/6	unknown	unknown
PMC4834462	26549744	10.1016/j.pscychresns.2015.10.007	Elsevier BV	Psychiatry research	0165-1781, 1872-7123	Is it me? Verbal self-monitoring neural network and clinical insight in schizophrenia	1940.74	TRUE	not applicable	unknown	cc-by	not applicable	hybrid	TRUE	Wellcome Trust			067427/z/02/z
PMC4834461	26190555	10.1016/j.pscychresns.2015.07.004	Elsevier BV	Psychiatry research	0165-1781, 1872-7123	Morphological abnormalities in prefrontal surface area and thalamic volume in attention deficit/hyperactivity disorder	1965.9	TRUE	not applicable	unknown	cc-by	not applicable	hybrid	TRUE	Wellcome Tust	0	0	76448	WT096002/Z/11/Z
PMC4834463	26778365	10.1016/j.pscychresns.2015.12.009	Elsevier BV	Psychiatry research	0165-1781, 1872-7123	Prospective longitudinal study of subcortical brain volumes in individuals at high familial risk of mood disorders with or without subsequent onset of depression	2104	TRUE	not applicable	unknown	cc-by	not applicable	hybrid	TRUE	Wellcome Trust			unknown	104036	unknown
PMC4756272	26749569	10.1016/j.psychres.2015.12.025	Elsevier BV	Psychiatry research	0165-1781, 1872-7123	Longer-term increased cortisol levels in young people with mental health problems	2119.04	TRUE	not applicable	unknown	cc-by	not applicable	hybrid	TRUE	Wellcome Trust	MRC	0	unknown	MR/K013599/1
PMC4922385	27173659	10.1016/j.psychres.2016.03.055	Elsevier BV	Psychiatry research	0165-1781, 1872-7123	Insomnia and hallucinations in the general population: findings from the 2000 and 2007 British Psychiatric Morbidity Surveys	2274.96	TRUE	not applicable	unknown	cc-by	not applicable	hybrid	TRUE	Wellcome Trust
PMC4821175	26923848	10.1016/j.psyneuen.2016.02.008	Elsevier BV	Psychoneuroendocrinology	0306-4530, 1873-3360	Associations between hair cortisol concentration, income, income dynamics and status incongruity in healthy middle-aged women	1800	TRUE	not applicable	unknown	cc-by	not applicable	hybrid	TRUE	British Heart Foundation	ESRC/MRC		1189948
PMC4712651	26600009	10.1016/j.psyneuen.2015.11.005	Elsevier BV	Psychoneuroendocrinology	0306-4530, 1873-3360	Higher serum dehydroepiandrosterone sulfate protects against the onset of depression in the elderly: findings from the English Longitudinal Study of Ageing (ELSA)	1889.7	TRUE	not applicable	unknown	cc-by	not applicable	hybrid	TRUE	British Heart Foundation			520373	RG/10/05/28296	R01 AG017644
PMC4510145	26036451	10.1016/j.psyneuen.2015.05.003	Elsevier BV	Psychoneuroendocrinology	0306-4530, 1873-3360	Fetal brain 11?-hydroxysteroid dehydrogenase type 2 selectively determines programming of adult depressive-like behaviors and cognitive function, but not anxiety behaviors in male mice	1952.07	TRUE	not applicable	unknown	cc-by	not applicable	hybrid	TRUE	Wellcome Trust			WT079009	G0700704	IN11/2011
PMC4962775	27281345	10.1016/j.psyneuen.2016.05.025	Elsevier BV	Psychoneuroendocrinology	0306-4530, 1873-3360	Depression 12-months after coronary artery bypass graft is predicted by cortisol slope over the day	2525.27	TRUE	not applicable	unknown	cc-by	not applicable	hybrid	TRUE	British Heart Foundation
PMC4994426	27003672	10.1016/j.puhe.2016.02.014	Elsevier BV	Public health	0033-3506, 1476-5616	Validity of self-reported versus actual age in Nepali children and young people	2070.66	TRUE	not applicable	unknown	cc-by	not applicable	hybrid	TRUE	Wellcome Trust
PMC4917892	27117177	10.1016/j.radonc.2016.03.021	Elsevier BV	Radiotherapy and oncology : journal of the European Society for Therapeutic Radiology and Oncology	0167-8140, 1879-0887	ARCII: A Phase II trial of the HIV protease inhibitor Nelfinavir in combination with chemoradiation for locally advanced inoperable pancreatic cancer	1757.02	TRUE	not applicable	unknown	cc-by	not applicable	hybrid	TRUE	Cancer Research UK			MC_PC_12001/2	16466
unknown	27666929	10.1016/j.radonc.2016.08.027	Elsevier BV	Radiotherapy and oncology : journal of the European Society for Therapeutic Radiology and Oncology	0167-8140, 1879-0887	Prolongation of overall treatment time as a cause of treatment failure in early breast cancer	1885	FALSE	FALSE	not applicable	unknown	unknown	hybrid	FALSE	Cancer Research UK
unknown	27470308	10.1016/j.radonc.2016.07.004	Elsevier BV	Radiotherapy and oncology : journal of the European Society for Therapeutic Radiology and Oncology	0167-8140, 1879-0887	Quality of treatment plans & accuracy of in-vivo port dosimetry in hybrid intensity-modulated radiation therapy & volumetric modulated arc therapy for prostate cancer	1852.73	FALSE	FALSE	not applicable	unknown	unknown	hybrid	FALSE	Cancer Research UK
PMC5084687	27617789	10.1016/j.rbmo.2016.08.004	Elsevier BV	Reproductive biomedicine online	1472-6483, 1472-6491	Disclosure of sperm donation: A comparison between solo mother and two-parent families with identifiable donors.	2307.79	TRUE	not applicable	unknown	cc-by	not applicable	hybrid	TRUE	wellcome-trust,
PMC4916263	26524726	10.1016/j.ridd.2015.10.004	Elsevier BV	Research in developmental disabilities	0891-4222, 1873-3379	The relative contributions of speechreading and vocabulary to deaf and hearing children's reading ability	1655.42	TRUE	not applicable	FALSE	cc-by	not applicable	hybrid	TRUE	Wellcome Trust	ESRC		100229	GR075214MA
PMC4687496	26553156	10.1016/j.rmed.2015.10.016	Elsevier BV	Respiratory medicine	0954-6111, 1532-3064	Association of pulse wave velocity with total lung capacity: A cross-sectional analysis of the BOLD London study	2298.23	TRUE	not applicable	unknown	cc-by	not applicable	hybrid	TRUE				085790/Z/08/Z
PMC4879149	26976676	10.1016/j.resuscitation.2016.01.020	Elsevier BV	Resuscitation	0300-9572, 1873-1570	Themes and variations: An exploratory international investigation into resuscitation decision-making	2716.41	TRUE	not applicable	unknown	cc-by	not applicable	hybrid	TRUE	Wellcome Trust	0	0
PMC4604249	26232240	10.1016/j.schres.2015.07.022	Elsevier BV	Schizophrenia research	0920-9964, 1573-2509	Structural correlates of formal thought disorder in schizophrenia	1919.96	TRUE	not applicable	unknown	cc-by	not applicable	hybrid	TRUE	Wellcome Trust	MRC	0	WT096002/Z/11	G0601442
PMC4847740	26972475	10.1016/j.schres.2016.03.005	Elsevier BV	Schizophrenia research	0920-9964, 1573-2509	A longitudinal investigation of childhood communication ability and adolescent psychotic experiences in a community sampoe	2265.68	TRUE	not applicable	unknown	cc-by	not applicable	hybrid	TRUE	Wellcome Trust	MRC		102215	76467	PDF-2012-05-195
PMC5145804	27130562	10.1016/j.schres.2016.04.015	Elsevier BV	Schizophrenia research	0920-9964, 1573-2509	Metabotropic glutamate receptor 3 (mGlu3; mGluR3; GRM3) in schizophrenia: antibody characterisation and a semi-quantitative western blot study	2302.71	TRUE	not applicable	unknown	cc-by	not applicable	hybrid	TRUE	Wellcome Trust
PMC4884769	27284531	10.1016/j.scog.2016.04.002	Elsevier BV	Schizophrenia research. Cognition	2215-0013	Are persistent delusions in schizophrenia associated with aberrant salience?	1398.11	TRUE	not applicable	unknown	cc-by	not applicable	oa	TRUE	Wellcome Trust
PMC5042290	27450643	10.1016/j.seizure.2016.07.002	Elsevier BV	Seizure	1059-1311, 1532-2688	Antibody-associated epilepsies: clinical features, evidence for immunotherapies and future research questions	1981.5	TRUE	not applicable	unknown	cc-by	not applicable	hybrid	TRUE	Wellcome Trust
PMC4823277	26581486	10.1016/j.semarthrit.2015.10.004	Elsevier BV	Seminars in arthritis and rheumatism	0049-0172, 1532-866X	Clinical assessment of effusion in knee osteoarthritis-A systematic review.	1979.92	TRUE	not applicable	unknown	cc-by	not applicable	hybrid	TRUE				18676
PMC4987145	27105755	10.1016/j.semarthrit.2016.03.001	Elsevier BV	Seminars in arthritis and rheumatism	0049-0172, 1532-866X	Systemic glucocorticoid therapy and adrenal insufficiency in adults: A systematic review.	2315.31	TRUE	not applicable	unknown	cc-by	not applicable	hybrid	TRUE				G0902272
PMC5052142	27422803	10.1016/j.semarthrit.2016.06.001	Elsevier BV	Seminars in arthritis and rheumatism	0049-0172, 1532-866X	Treatment prescribing patterns in patients with juvenile idiopathic arthritis (JIA): Analysis from the UK Childhood Arthritis Prospective Study (CAPS).	2476.19	TRUE	not applicable	unknown	cc-by	not applicable	hybrid	TRUE
unknown	27586372	10.1016/j.semcancer.2016.08.009	Elsevier BV	Seminars in cancer biology	1044-579X, 1096-3650	TGFB-INDUCED TRANSCRIPTION IN CANCER	2698.11	FALSE	TRUE	not applicable	unknown	unknown	hybrid	FALSE	Cancer Research UK
PMC5056954	26791049	10.1016/j.semcdb.2016.01.009	Elsevier BV	Seminars in cell & developmental biology	1084-9521, 1096-3634	The regulation of oncogenic Ras/ERK signalling by dual-specificity mitogen activated protein kinase phosphatases (MKPs)	2718.35	TRUE	not applicable	unknown	cc-by	not applicable	hybrid	TRUE	Cancer Research UK			C8227/A12053	12053
PMC4884668	26845196	10.1016/j.semcdb.2016.01.043	Elsevier BV	Seminars in cell & developmental biology	1084-9521, 1096-3634	Actomyosin Ring driven Cytokinesis in Budding Yeast	2745.26	TRUE	not applicable	unknown	cc-by	not applicable	hybrid	TRUE	Wellcome Trust	0	0
unknown	25289569	10.1016/j.semcdb.2014.09.023	Elsevier BV	Seminars in cell & developmental biology	1084-9521, 1096-3634	mTOR signalling, embryogenesis and the control of lung development	2120.31	FALSE	FALSE	not applicable	unknown	unknown	hybrid	FALSE	Wellcome Trust			088032/Z/08/Z
PMC4643756	26726286	10.1016/j.snb.2015.08.095	Elsevier BV	Sensors and actuators. B, Chemical	0925-4005	Experimental investigation of the effect of polymer matrices on polymer fibre optic oxygen sensors and their time response characteristics using a vacuum testing chamber and a liquid flow apparatus	1644.5	TRUE	not applicable	unknown	cc-by	not applicable	hybrid	TRUE	Wellcome Trust
PMC4744087	26826049	10.1016/j.srhc.2015.11.007	Elsevier BV	Sexual & reproductive healthcare : official journal of the Swedish Association of Midwives	1877-5756, 1877-5764	Dickkopf-3 is upregulated in osteoarthritis and has a chondroprotective role	1796.38	TRUE	not applicable	unknown	cc-by	not applicable	hybrid	TRUE	Arthritis Research UK			84674	unknown
PMC4714610	26647364	10.1016/j.socscimed.2015.11.022	Elsevier BV	Social science & medicine (1982)	0277-9536, 1873-5347	Examining a Conceptual Model of Parental Nurturance, Parenting Practices and Physical Activity among 5-6 year olds	2430.75	TRUE	not applicable	unknown	cc-by	not applicable	hybrid	TRUE	British Heart Foundation			MC_UU_12013/5	SP/14/4/31123	PG/11/51/28986
PMC4884667	27140840	10.1016/j.socscimed.2016.04.027	Elsevier BV	Social science & medicine (1982)	0277-9536, 1873-5347	Anticipated stigma and blameless guilt: Mothers' evaluation of life with the sex-linked disorder, hypohidrotic ectodermal dysplasia (XHED)	2697.43	TRUE	not applicable	unknown	cc-by	not applicable	hybrid	TRUE	Wellcome Trust	0	0
PMC4857700	27082023	10.1016/j.socscimed.2016.04.004	Elsevier BV	Social science & medicine (1982)	0277-9536, 1873-5347	Marital transitions and associated changes in fruit and vegetable intake: Findings from the population-based prospective EPIC-Norfolk cohort, UK.	2756	TRUE	not applicable	FALSE	cc-by	not applicable	hybrid	TRUE	british-heart-foundation, esrc, mrc, nihr, wellcome-trust,	0	0	MR/K023187/1	MC_UU_12015/1
PMC5034849	27566044	10.1016/j.socscimed.2016.08.019	Elsevier BV	Social science & medicine (1982)	0277-9536, 1873-5347	Morals, morale and motivations in data fabrication: Medical research fieldworkers views and practices in two Sub-Saharan African contexts	3125.36	TRUE	not applicable	unknown	cc-by	not applicable	hybrid	TRUE	Wellcome Trust
PMC5165046	28018958	10.1016/j.ssmph.2016.05.006	Elsevier BV	SSM - population health	2352-8273	The impact of housing payment problems on health status during economic recession: A comparative analysis of longitudinal EU SILC data of 27 European states, 2008-2010	955.48	TRUE	not applicable	unknown	cc-by	not applicable	oa	TRUE	Wellcome Trust			313590
PMC5165043	28018957	10.1016/j.ssmph.2016.04.001	Elsevier BV	SSM - population health	2352-8273	How can GPS technology help us better understand exposure to the food environment? A systematic review.	962.62	TRUE	not applicable	FALSE	cc-by	not applicable	oa	TRUE	british-heart-foundation, cancer-research-uk, esrc, mrc, nihr, wellcome-trust,	0	0
PMC4944585	27411105	10.1016/j.stemcr.2016.06.004	Elsevier BV	Stem cell reports	2213-6711	Immobilized Wnt Proteins Act as a Stem Cell Niche for Tissue Engineering	2390.92	TRUE	not applicable	unknown	cc-by	not applicable	oa	TRUE	Wellcome Trust
PMC4834040	26947977	10.1016/j.stemcr.2016.02.005	Elsevier BV	Stem cell reports	2213-6711	Naive Pluripotent Stem Cells Derived Directly from Isolated Cells of the Human Inner Cell Mass.	2483.11	TRUE	not applicable	unknown	cc-by	not applicable	oa	TRUE	bbsrc, mrc, wellcome-trust, Swiss National Science Foundation/Novartis	0	0	unknown	BB/M004023/1	unknown
PMC5063467	27641648	10.1016/j.stemcr.2016.08.008	Elsevier BV	Stem cell reports	2213-6711	Distinctive Roles of Canonical and Noncanonical Wnt Signaling in Human Embryonic Cardiomyocyte Development	2611.13	TRUE	not applicable	unknown	cc-by	not applicable	oa	TRUE	British Heart Foundation			PG/12/75/29851	FS/12/37/29516
PMC4682065	26549847	10.1016/j.stemcr.2015.10.002	Elsevier BV	Stem cell reports	2213-6711	Generation of high number of healthy erythroid cells from gene-edited pyruvate kinase deficiency patient-specific induced pluripotent stem cells	2745.28	TRUE	not applicable	unknown	cc-by	not applicable	oa	TRUE				RC1 HL099559
PMC4750161	26862703	10.1016/j.stemcr.2016.01.006	Elsevier BV	Stem cell reports	2213-6711	What Is Trophoblast? A Combination of Criteria Define Human First-Trimester Trophoblast.	2833.8	TRUE	not applicable	unknown	cc-by	not applicable	oa	TRUE	british-heart-foundation, wellcome-trust, CIHR (Canadian)	0	0	090108/Z/09/Z	085992/Z/08/Z	PG/09/077/27964
PMC4788783	26905200	10.1016/j.stemcr.2016.01.013	Elsevier BV	Stem cell reports	2213-6711	ER stress and autophagic perturbations lead to elevated extracellular alfa-synuclein in GBA-N370S Parkinson's iPSC-derived dopamine neurons	2923.58	TRUE	not applicable	unknown	cc-by	not applicable	oa	TRUE	Parkinson's UK	Parkinson's UK		WT082260/Z/07/Z	090532/Z/09/Z	G090074791070
PMC4671958	26636256	10.1016/j.str.2015.10.014	Elsevier BV	Structure (London, England : 1993)	0969-2126, 1878-4186	Structure of the Helicase Domain of DNA Polymerase Theta Reveals a Possible Role in the Microhomology-Mediated End-Joining Pathway	3161.12	TRUE	not applicable	unknown	cc-by	not applicable	hybrid	TRUE	Wellcome Trust			092809/Z/10/Z	106169
PMC4533223	26146185	10.1016/j.str.2015.05.019	Elsevier BV	Structure (London, England : 1993)	0969-2126, 1878-4186	Structures of CD6 and Its Ligand CD166 Give Insight into Their Interaction	3226.63	TRUE	not applicable	unknown	cc-by	not applicable	hybrid	TRUE	Wellcome Trust	British Heart Foundation		100298/Z/12/Z	100298	MR/M011984/1
PMC4780864	26853940	10.1016/j.str.2015.12.015	Elsevier BV	Structure (London, England : 1993)	0969-2126, 1878-4186	Family-wide Structural Analysis of Human Numb-Associated Protein Kinases	3411.84	TRUE	not applicable	unknown	cc-by	not applicable	hybrid	TRUE	Wellcome Trust
PMC4826271	26996963	10.1016/j.str.2016.02.008	Elsevier BV	Structure (London, England : 1993)	0969-2126, 1878-4186	New Structural Insights into the Genome and Minor Capsid Proteins of BK Polyomavirus using Cryo-Electron Microscopy.	3450.36	TRUE	not applicable	unknown	cc-by	not applicable	hybrid	TRUE	Wellcome Trust	MRC	0	102572/B/13/Z	1052221/Z/14/Z	096685/Z/11/Z
PMC4975591	27452402	10.1016/j.str.2016.06.009	Elsevier BV	Structure (London, England : 1993)	0969-2126, 1878-4186	Phosphorylation of cysteine string protein triggers a major conformational switch	4536.68	TRUE	not applicable	unknown	cc-by	not applicable	hybrid	TRUE	Wellcome Trust
PMC4597091	26320580	10.1016/j.str.2015.07.016	Elsevier BV	Structure (London, England : 1993)	0969-2126, 1878-4186	Crystal Structures of the Extracellular Domain from PepT1 and PepT2 Provide Novel Insights into Mammalian Peptide Transport	3840.96	TRUE	not applicable	unknown	cc-by	not applicable	hybrid	TRUE	Wellcome Trust			102890/Z/13/Z	102890	84655
PMC4744086	26724997	10.1016/j.str.2015.11.008	Elsevier BV	Structure (London, England : 1993)	0969-2126, 1878-4186	Structures of the EphA2 Receptor at the Membrane: Role of Lipid Interactions	4097.44	TRUE	not applicable	unknown	cc-by	not applicable	hybrid	TRUE	Wellcome Trust			WT092970MA	090532/Z/09/Z	10976
PMC4780862	26833387	10.1016/j.str.2015.12.011	Elsevier BV	Structure (London, England : 1993)	0969-2126, 1878-4186	The Role of the Membrane in the Structure and Biophysical Robustness of the Dengue Virion Envelope	4097.44	TRUE	not applicable	unknown	cc-by	not applicable	hybrid	TRUE	Wellcome Trust			unknown
PMC4826273	26996961	10.1016/j.str.2016.02.010	Elsevier BV	Structure (London, England : 1993)	0969-2126, 1878-4186	Non-linear and flexible regions of the human Notch-1 extracellular domain revealed by high-resolution structural studies	4151.35	TRUE	not applicable	unknown	cc-by	not applicable	hybrid	TRUE	Wellcome Trust	Wellcome Trust	Wellcome Trust	3097928	100298	79440
PMC4906244	27161979	10.1016/j.str.2016.04.001	Elsevier BV	Structure (London, England : 1993)	0969-2126, 1878-4186	A comparative structure/function analysis of two type IV pilin DNA receptors defines a novel mode of DNA-binding	4187.05	TRUE	not applicable	unknown	cc-by	not applicable	hybrid	TRUE				BB/J016764/1
PMC4975593	27427480	10.1016/j.str.2016.06.002	Elsevier BV	Structure (London, England : 1993)	0969-2126, 1878-4186	Interactions of Pleckstrin homology domains with membranes adding back the bilayer via High throughput molecular dynamics	4503.42	TRUE	not applicable	unknown	cc-by	not applicable	hybrid	TRUE	Wellcome Trust
PMC4660056	26709317	10.1016/j.tet.2015.10.052	Elsevier BV	Tetrahedron	0040-4020	Synthesis of an azido-tagged low affinity ratiometric calcium sensor	1499.63	TRUE	not applicable	unknown	cc-by	not applicable	hybrid	TRUE	Wellcome Trust (WELLCOME)	Biotechnology and Biological Sciences Research Council (BBSRC)		PG/11/70/29086
		10.1016/j.tet.2015.10.061	Elsevier BV	Tetrahedron	0040-4020	An expedient strategy for the diversity-oriented synthesis of macrocyclic compounds with natural product-like characteristics	1496.3	FALSE	TRUE	not applicable	unknown	unknown	hybrid	FALSE	bbsrc, epsrc, erc, mrc, wellcome-trust,	0	0
PMC4837228	26996769	10.1016/j.amjcard.2016.02.003	Elsevier BV	The American journal of cardiology	0002-9149, 1879-1913	Prognostic Utility of Calcium Scoring as an Adjunct to Stress Myocardial Perfusion Scintigraphy in End-Stage Renal Disease	2264.99	TRUE	not applicable	unknown	cc-by	not applicable	hybrid	TRUE	British Heart Foundation	0	0	FS/11/17/28700
PMC4861758	27001627	10.1016/j.ajpath.2015.12.014	Elsevier BV	The American journal of pathology	0002-9440, 1525-2191	Ketamine-induced apoptosis in normal human urothelial cells: a direct, N-methyl-D-aspartate receptor-independent pathway characterised by mitochondrial stress.	1828.06	TRUE	not applicable	FALSE	unknown	unknown	hybrid	FALSE	Wellcome Trust	Wellcome Trust	Wellcome Trust
PMC4929388	27181404	10.1016/j.ajpath.2016.03.004	Elsevier BV	The American journal of pathology	0002-9440, 1525-2191	PERK Activation Promotes Medulloblastoma Tumorigenesis by Attenuating Premalignant Granule Cell Precursor Apoptosis.	2444.76	TRUE	not applicable	FALSE	unknown	unknown	hybrid	FALSE	wellcome-trust,	0	0	P30 CA021765	R56 NS037956	R01 NS073132
PMC4977013	26971241	10.1016/j.cjca.2016.01.004	Elsevier BV	The Canadian journal of cardiology	0828-282X, 1916-7075	Influence of Genetic Risk Factors on Coronary Heart Disease Occurrence in Afro-Caribbeans	2160	TRUE	not applicable	unknown	cc-by	not applicable	hybrid	TRUE	British Heart Foundation	MRC
PMC4989034	26968393	10.1016/j.cjca.2015.12.023	Elsevier BV	The Canadian journal of cardiology	0828-282X, 1916-7075	Vascular complications of cancer chemotherapy	2503.13	TRUE	not applicable	unknown	cc-by	not applicable	hybrid	TRUE	British Heart Foundation (BHF)	British Heart Foundation (BHF)		RG/13/7/30099
PMC4906153	27118293	10.1016/j.cjca.2016.02.070	Elsevier BV	The Canadian journal of cardiology	0828-282X, 1916-7075	Vascular fibrosis in aging and hypertension: molecular mechanisms and clinical implications	2565.38	TRUE	not applicable	unknown	cc-by	not applicable	hybrid	TRUE	British Heart Foundation (BHF)	British Heart Foundation (BHF)		RG/13/7/30099
PMC4679077	26475020	10.1016/j.biocel.2015.10.006	Elsevier BV	The international journal of biochemistry & cell biology	1357-2725, 1878-5875	Suppression of AGO2 by miR-132 as a determinant of miRNA-mediated silencing in human endothelial cells	1900.1	TRUE	not applicable	unknown	cc-by	not applicable	hybrid	TRUE	Wellcome Trust	MRC	0	WT095024MA	1504182	BB/I007571/1
PMC4711337	26556311	10.1016/j.biocel.2015.10.029	Elsevier BV	The international journal of biochemistry & cell biology	1357-2725, 1878-5875	Phenylephrine preconditioning in embryonic heart H9c2 cells is mediated by up-regulation of SUR2B/Kir6.2: a first evidence for functional role of SUR2B in sarcolemmal KATP channels and cardioprotection	2417.84	TRUE	not applicable	unknown	cc-by	not applicable	hybrid	TRUE	British Heart Foundation			PG/15/28/31384	PG/11/106/29235
PMC4762460	26725717	10.1016/j.jadohealth.2015.10.248	Elsevier BV	The Journal of adolescent health : official publication of the Society for Adolescent Medicine	1054-139X, 1879-1972	Incidence of human papillomavirus in Tanzania adolescents.	1887.77	TRUE	not applicable	unknown	cc-by	not applicable	hybrid	TRUE	Wellcome Trust			ITCRBE30	G0700837	MR/K012126/1
PMC5026680	27496078	10.1016/j.jadohealth.2016.05.017	Elsevier BV	The Journal of adolescent health : official publication of the Society for Adolescent Medicine	1054-139X, 1879-1972	Sexual function in British 16 to 21 year olds	2051.17	TRUE	not applicable	unknown	cc-by	not applicable	hybrid	TRUE	Wellcome Trust	MRC		MC_UU_12017/11
PMC4775071	26560041	10.1016/j.jaci.2015.08.051	Elsevier BV	The Journal of allergy and clinical immunology	0091-6749, 1097-6825	A homozygous STIM1 mutation impairs SOCE and NK-cell killing without clinical immunodeficiency	1966.96	TRUE	not applicable	unknown	cc-by	not applicable	hybrid	TRUE	Wellcome Trust	0	0	82448
PMC4819769	26830116	10.1016/j.jaci.2015.11.022	Elsevier BV	The Journal of allergy and clinical immunology	0091-6749, 1097-6825	Filaggrin genotype does not determine the skins threshold to UV-induced erythema	2091.04	TRUE	not applicable	unknown	cc-by	not applicable	hybrid	TRUE	Wellcome Trust			098439/Z/12/Z	086398/Z/08/Z	G0700314
PMC5010149	27215491	10.1016/j.jaci.2016.01.052	Elsevier BV	The Journal of allergy and clinical immunology	0091-6749, 1097-6825	Migration and allergic diseases in a rural area of a developing country	2095.18	TRUE	not applicable	unknown	cc-by	not applicable	hybrid	TRUE	Wellcome Trust	Wellcome Trust
PMC4929135	26851968	10.1016/j.jaci.2015.11.020	Elsevier BV	The Journal of allergy and clinical immunology	0091-6749, 1097-6825	Multidimensional endotyping in severe asthma reveals inflammatory heterogeneity in matrix metalloproteinases and chitinase-3-like protein 1	2246.16	TRUE	not applicable	unknown	cc-by	not applicable	hybrid	TRUE	MRC	Wellcome Trust	0	G0800649
PMC5052125	27345173	10.1016/j.jaci.2016.05.006	Elsevier BV	The Journal of allergy and clinical immunology	0091-6749, 1097-6825	Innate Generation of Thrombin and Intracellular Oxidants in Airway Epithelium by Allergen Der p1	2259.91	TRUE	not applicable	unknown	cc-by	not applicable	hybrid	TRUE	Wellcome Trust
PMC5052126	27106203	10.1016/j.jaci.2016.01.046	Elsevier BV	The Journal of allergy and clinical immunology	0091-6749, 1097-6825	Associations of wheezing phenotypes with late asthma outcomes in ALSPAC: a population-based birth cohort	2471.66	TRUE	not applicable	unknown	cc-by	not applicable	hybrid	TRUE	MRC	Wellcome Trust		102215	MC_PC_15018
PMC4774944	26525228	10.1016/j.jaci.2015.08.049	Elsevier BV	The Journal of allergy and clinical immunology	0091-6749, 1097-6825	Common variable immunodeficiency and natural killer cell lymphopenia caused by Ets-binding site mutation in the IL-2 receptor ? (IL2RG) gene promoter	2503.41	TRUE	not applicable	unknown	cc-by	not applicable	hybrid	TRUE	Wellcome Trust			103413/Z/13/Z	095198/Z/10/Z	95198
PMC5138155	27614800	10.1016/j.jaci.2016.06.029	Elsevier BV	The Journal of allergy and clinical immunology	0091-6749, 1097-6825	Bone marrow transplantation for MHC class I deficiency corrects T cell immunity but dissociates NK cell repertoire formation from function.	2739.67	TRUE	not applicable	unknown	cc-by	not applicable	hybrid	TRUE	Wellcome Trust	0	0
PMC5010150	27476889	10.1016/j.jaci.2016.07.007	Elsevier BV	The Journal of allergy and clinical immunology	0091-6749, 1097-6825	Regulation of the host immune system by helminth parasites	2751.05	TRUE	not applicable	unknown	cc-by	not applicable	hybrid	TRUE
PMC4852952	27006248	10.1016/j.jaci.2016.02.001	Elsevier BV	The Journal of allergy and clinical immunology	0091-6749, 1097-6825	Relation between lung function and quantitative computed tomography parameters of airway remodelling, air-trapping and emphysema in asthma and COPD: a single-center study	2752.86	TRUE	not applicable	unknown	cc-by	not applicable	hybrid	TRUE	Wellcome Trust			2037
unknown	26934939	10.1016/j.jaci.2015.11.040	Elsevier BV	The Journal of allergy and clinical immunology	0091-6749, 1097-6825	Filaggrin-null mutations are associated with increased maturation markers on Langerhans cells	2099.73	FALSE	FALSE	not applicable	unknown	unknown	hybrid	FALSE	Wellcome Trust
	27484035	10.1016/j.jaci.2016.06.014	Elsevier BV	The Journal of allergy and clinical immunology	0091-6749, 1097-6825	Transcriptional profiling identifies the lncRNA PVT1 as a novel rewgulator of the asthmatic phenotype in human airway smooth muscle	2698.46	FALSE	TRUE	not applicable	unknown	unknown	hybrid	FALSE
unknown	27477328	10.1016/j.jaci.2016.03.059	Elsevier BV	The Journal of allergy and clinical immunology	0091-6749, 1097-6825	Immune dysregulation in patients with PTEN hamartoma tumor syndrome - analysis of FOXP3 regulatory T cells	2711.76	FALSE	TRUE	not applicable	unknown	unknown	hybrid	FALSE	Cancer Research UK	Wellcome Trust
	27555459	10.1016/j.jaci.2016.06.021	Elsevier BV	The Journal of allergy and clinical immunology	0091-6749, 1097-6825	Clinical spectrum and features of activated PI3-kinase delta syndrome: a large patient cohort study	2741.29	FALSE	TRUE	not applicable	unknown	unknown	hybrid	FALSE	bbsrc, cancer-research-uk, erc, mrc, nihr, wellcome-trust,
PMC4993094	26996088	10.1016/j.jhin.2016.01.021	Elsevier BV	The Journal of hospital infection	0195-6701, 1532-2939	A qualitative study of views and experiences of performance management for healthcare-associated infections	2607.64	TRUE	not applicable	unknown	cc-by	not applicable	hybrid	TRUE	Wellcome Trust			97899
PMC4769314	26763186	10.1016/j.jinf.2015.12.014	Elsevier BV	The Journal of infection	0163-4453, 1532-2742	Quantitative Phospho-proteomics Reveals The Plasmodium Merozoite Triggers Pre-invasion Host Kinase Modification Of The Red Cell Cytoskeleton	1188	TRUE	not applicable	unknown	cc-by	not applicable	hybrid	TRUE				100693
PMC4769314	26763186	10.1016/j.jinf.2015.12.014	Elsevier BV	The Journal of infection	0163-4453, 1532-2742	Quantitative Phospho-proteomics Reveals The Plasmodium Merozoite Triggers Pre-invasion Host Kinase Modification Of The Red Cell Cytoskeleton	2505.19	TRUE	not applicable	unknown	cc-by	not applicable	hybrid	TRUE				100693
PMC4879866	27018131	10.1016/j.jinf.2016.03.010	Elsevier BV	The Journal of infection	0163-4453, 1532-2742	Pharyngeal carriage of Neisseria species in the African meningitis belt	2598.37	TRUE	not applicable	unknown	cc-by	not applicable	hybrid	TRUE	Wellcome Trust			87622	100891
PMC5127880	27575582	10.1016/j.jinf.2016.08.010	Elsevier BV	The Journal of infection	0163-4453, 1532-2742	Genomic analyses of Neisseria gonorrhoeae reveal an association of the gonococcal genetic island with antimicrobial resistance	2930.03	TRUE	not applicable	unknown	cc-by	not applicable	hybrid	TRUE	Wellcome Trust			87622
PMC4990000	27311750	10.1016/j.jinf.2016.05.012	Elsevier BV	The Journal of infection	0163-4453, 1532-2742	HIV coinfection influences the inflammatory response but not the outcome of cerebral malaria in Malawian children	3232.3	TRUE	not applicable	unknown	cc-by	not applicable	hybrid	TRUE	Wellcome Trust
PMC4759621	26763429	10.1038/jid.2015.383	Elsevier BV	The Journal of investigative dermatology	0022-202X, 1523-1747	Increased bacterial load and expression of antimicrobial peptides in skin of barrier-deficient mice with reduced... Susceptibility	1133.08	TRUE	not applicable	unknown	cc-by	not applicable	hybrid	TRUE	Wellcome Trust			unknown	96540	unknown
PMC4946792	27066886	10.1016/j.jid.2016.03.036	Elsevier BV	The Journal of investigative dermatology	0022-202X, 1523-1747	Fibroblast-Derived MMP-14 Regulates Collagen Homeostasis in Adult Skin.	2134.06	TRUE	not applicable	unknown	cc-by	not applicable	hybrid	TRUE
PMC4874948	26902921	10.1016/j.jid.2016.01.036	Elsevier BV	The Journal of investigative dermatology	0022-202X, 1523-1747	ÃŸ-catenin stabilization in skin fibroblasts causes fibrotic lesions by preventing adipocyte differentiation of the reticular dermis	2261.55	TRUE	not applicable	unknown	cc-by	not applicable	hybrid	TRUE	Wellcome Trust
PMC4759620	26763448	10.1038/jid.2015.364	Elsevier BV	The Journal of investigative dermatology	0022-202X, 1523-1747	Lentiviral engineered fibroblasts expressing codon optimized COL7A1 restore anchoring fibrils in RDEB	2520	TRUE	not applicable	unknown	cc-by	not applicable	hybrid	TRUE	Wellcome Trust			RP-2014-05-007	BB/E005896/1
PMC4803466	26778290	10.1016/j.jid.2015.11.027	Elsevier BV	The Journal of investigative dermatology	0022-202X, 1523-1747	Mosaic activating mutations in GNA11 and GNAQ are associated with Phakomatosis Pigmentovascularis and Extensive Dermal Melanocytosis	2719.27	TRUE	not applicable	unknown	cc-by	not applicable	hybrid	TRUE	Wellcome Trust			WT104076MA	MC_PC_U127585840	unknown
PMC4829940	26953979	10.1016/j.jsbmb.2016.03.005	Elsevier BV	The Journal of steroid biochemistry and molecular biology	0960-0760, 1879-1220	25-hydroxyvitamin D in pregnancy and genome wide cord blood DNA methylation in two pregnancy cohorts (MoBa and ALSPAC)	2677.6	TRUE	not applicable	unknown	cc-by	not applicable	hybrid	TRUE	MRC	Wellcome Trust	BBSRC	102215	BB/I025263/1	BBI025751/1
unknown	unknown	10.1016/s0140-6736(15)01129-0	Elsevier BV	The Lancet	0140-6736	Anastrozole versus tamoxifen for the prevention of locoregional and contralateral breast cancer in postmenopausal women with locally excised ductal carcinoma in situ (IBIS-II DCIS): a double-blind, randomised controlled trial	4084.7	FALSE	TRUE	not applicable	unknown	unknown	hybrid	FALSE
unknown	unknown	10.1016/S0140-6736(16)31008-X	Elsevier BV	The Lancet	0140-6736	Tuberculosis in migrants moving from high to low incidence countries: a population-based cohort study of 519,955 migrants to the England, Wales and Northern Ireland screened pre-entry	4505.25	FALSE	TRUE	not applicable	unknown	unknown	hybrid	FALSE	Wellcome Trust
		10.1016/S0140-6736(15)00257-3	Elsevier BV	The Lancet	0140-6736	Spironolactone versus placebo, bisoprolol, and doxazosin to determine the optimal treatment for drug-resistant hypertension (PATHWAY-2): a randomised, double-blind, crossover trial	4852.5	FALSE	TRUE	not applicable	unknown	unknown	hybrid	FALSE	british-heart-foundation, NIHR (Comprehensive Local Research Networks and Biomedical Research Centre awards)	0	0
		10.1016/S2213-8587(15)00377-0	Elsevier BV	The Lancet Diabetes & Endocrinology	2213-8587	Effect of amiloride, or amiloride plus hydrochlorothiazide, versus hydrochlorothiazide on glucose tolerance and blood pressure (PATHWAY-3): a parallel-group, double-blind randomised phase 4 trial	3932.9	FALSE	TRUE	not applicable	unknown	unknown	hybrid	FALSE	british-heart-foundation, nihr, National Institute of Health Research Comprehensive Local Research Networks.	0	0
		10.1016/S2468-1253(16)30086-3	Elsevier BV	The Lancet Gastroenterology & Hepatology	2468-1253	A non-endoscopic sampling device to sample the oesophageal microbiota: a case-control study	4507.02	FALSE	TRUE	not applicable	unknown	unknown	hybrid	FALSE	cruk, NIHR, Wellcome, mrc
		10.1016/S2213-2600(15)00544-5	Elsevier BV	The Lancet Respiratory Medicine	2213-2600	BMPR2 mutations and survival in pulmonary arterial hypertension: an individual participant data meta-analysis	4257.69	FALSE	TRUE	not applicable	unknown	unknown	hybrid	FALSE	british-heart-foundation, mrc, nihr,	0	0
PMC4673089	26109024	10.1016/s2213-8587(15)00129-1	Elsevier BV	The lancet. Diabetes & endocrinology	2213-8587, 2213-8595	Impact of diabetes definition on global surveillance of diabetes prevalence and diagnosis: pooled analysis of 96 population-based studies with 330,000 participants	3960.9	TRUE	not applicable	unknown	cc-by	not applicable	hybrid	TRUE				100693	unknown	98504
PMC4805857	26781229	10.1016/s2213-8587(15)00386-1	Elsevier BV	The lancet. Diabetes & endocrinology	2213-8587, 2213-8595	Plasma urate concentration and risk of coronary heart disease: a Mendelian randomisation analysis	3986.19	TRUE	not applicable	unknown	cc-by	not applicable	hybrid	TRUE	British Heart Foundation	MRC		068545/Z/02	57762	RG/97006
PMC5075282	26774708	10.1016/s2214-109x(15)00299-5	Elsevier BV	The Lancet. Global health	2214-109X	Posterior lamellar versus bilamellar tarsal rotation surgery for trachomatous trichiasis in Ethiopia: a randomised controlled trial.	4094.42	TRUE	not applicable	unknown	cc-by	not applicable	oa	TRUE	Wellcome Trust			098481/Z/12/Z
PMC5081398	27198842	10.1016/s2214-109x(16)30052-3	Elsevier BV	The Lancet. Global health	2214-109X	Topical 5-Fluorouracil following surgery for ocular surface squamous neoplasia in Kenya: a randoised, double-masked, placebo-controlled trial.	4188.42	TRUE	not applicable	unknown	cc-by	not applicable	oa	TRUE	Wellcome Trust
PMC4985564	27470174	10.1016/s2214-109x(16)30133-4	Elsevier BV	The Lancet. Global health	2214-109X	Chronic disease outcomes after severe acute malnutrition in Malawian children (ChroSAM): a cohort study	4512.43	TRUE	not applicable	unknown	cc-by	not applicable	oa	TRUE	Wellcome Trust
PMC5010562	27570089	10.1016/s2352-3026(16)30079-5	Elsevier BV	The Lancet. Haematology	2352-3026	Rivaroxaban versus warfarin in patients with thrombotic antiphospholipid syndrome, with or without SLE (RAPS): a randomised, controlled, open label, phase 2/3, non-inferiority trial	4505.25	TRUE	not applicable	unknown	cc-by	not applicable	hybrid	TRUE	Arthritis Research UK
PMC4384819	25844394	10.1016/s2352-3018(15)00016-8	Elsevier BV	The lancet. HIV	2405-4704, 2352-3018	Community-based strategies to strengthen the continuum of HIV care are cost-effective in rural South Africa: a health economic modelling analysis	3830.39	TRUE	not applicable	unknown	cc-by	not applicable	hybrid	TRUE				090285/Z/09/Z	3 R0 AI083034-02S2	5 R01 AI083034
PMC4700389	26546548	10.1016/s1473-3099(15)00362-x	Elsevier BV	The Lancet. Infectious diseases	1473-3099, 1474-4457	Use of ChAd3-EBO-Z Ebola virus vaccine in Malian and US adults, and boosting of Malian adults with MVA-BN-Filo: a phase 1, single-blind, randomised trial, a phase 1b, open-label and double-blind, dose-escalation trial, and a nested, randomised, double-blind, placebo-controlled trial	3841.52	TRUE	not applicable	unknown	cc-by	not applicable	hybrid	TRUE	Wellcome Trust			unknown	1	HHSN261200800001C
PMC4579482	26116186	10.1016/s1473-3099(15)00062-6	Elsevier BV	The Lancet. Infectious diseases	1473-3099, 1474-4457	Whole-genome sequencing for prediction of Mycobacterium tuberculosis drug susceptibility and resistance: a retrospective cohort study	3920.27	TRUE	not applicable	unknown	cc-by	not applicable	hybrid	TRUE	Wellcome Trust			087646/Z/08/Z	T5-358	102541
PMC4655307	26515523	10.1016/s1473-3099(15)00267-4	Elsevier BV	The Lancet. Infectious diseases	1473-3099, 1474-4457	Genomic epidemiology of age-associated meningococcal lineages in national surveillance: an observational cohort study	4158.87	TRUE	not applicable	unknown	cc-by	not applicable	hybrid	TRUE	Wellcome Trust			102908	104992	87622
PMC4835583	26831472	10.1016/s1473-3099(15)00536-8	Elsevier BV	The Lancet. Infectious diseases	1473-3099, 1474-4457	Global epidemiology of drug resistance after failure of WHO recommended first-line regimens for adult HIV-1 infection: a multicentre retrospective cohort study	4245.06	TRUE	not applicable	unknown	cc-by	not applicable	hybrid	TRUE	Wellcome Trust			MC_UU_12023/23	UM1 AI069456	R01 AI098558
PMC4828586	27017469	10.1016/s1474-4422(16)00071-5	Elsevier BV	The Lancet. Neurology	1474-4422, 1474-4465	Deletions at 22q11.2 in idiopathic Parkinson's Disease: a combined analysis of GWAS data	4366.81	TRUE	not applicable	unknown	cc-by	not applicable	hybrid	TRUE	Wellcome Trust			93875	Z01 AG000949	G1000183B
PMC4705431	26474517	10.1016/s1470-2045(15)00220-x	Elsevier BV	The Lancet. Oncology	1470-2045, 1474-5488	Cediranib combined with carboplatin and paclitaxel in patients with metastatic or recurrent cervical cancer (CIRCCa): a randomised, double-blind, placebo-controlled phase 2 trial	3821.52	TRUE	not applicable	unknown	cc-by	not applicable	hybrid	TRUE	Cancer Research UK (CAN-RES-UK)			19278	unknown	SCD/11
PMC5052459	27569442	10.1016/s1470-2045(16)30214-5	Elsevier BV	The Lancet. Oncology	1470-2045, 1474-5488	Comparison of MAPIE versus MAP in patients with a poor response to preoperative chemotherapy for newly diagnosed high-grade osteosarcoma (EURAMOS-1): an open-label, international, randomised controlled trial	4273.48	TRUE	not applicable	unknown	cc-by	not applicable	hybrid	TRUE	Cancer Research UK	MRC		U10 CA098413	U10 CA180899	U10 CA180886
PMC5052458	27527254	10.1016/s1470-2045(16)30240-6	Elsevier BV	The Lancet. Oncology	1470-2045, 1474-5488	Genome-wide association studies in oesophageal adenocarcinoma and Barrett's oesophagus: a large-scale meta-analysis	4558.53	TRUE	not applicable	unknown	cc-by	not applicable	hybrid	TRUE	Wellcome Trust			K05 CA124911	P01 CA091955	U01 CA057949
PMC4579558	26360286	10.1016/s2215-0366(15)00088-7	Elsevier BV	The lancet. Psychiatry	2215-0366, 2215-0374	Substance use disorders, psychiatric disorders, and mortality after release from prison: a nationwide longitudinal cohort study	3600	TRUE	not applicable	unknown	cc-by	not applicable	hybrid	TRUE	Wellcome Trust			95806
PMC4520382	26236648	10.1016/s2215-0366(14)00128-x	Elsevier BV	The lancet. Psychiatry	2215-0366, 2215-0374	Depression and violence: a Swedish population study	3600	TRUE	not applicable	unknown	cc-by	not applicable	hybrid	TRUE	Wellcome Trust			95806	NF-SI-0513-10010
PMC4629414	26342957	10.1016/s2215-0366(15)00234-5	Elsevier BV	The lancet. Psychiatry	2215-0366, 2215-0374	Psychiatric disorders and violent reoffending: a national cohort study of convicted prisoners in Sweden	3600	TRUE	not applicable	unknown	cc-by	not applicable	hybrid	TRUE	Wellcome Trust			95806
PMC4698465	26669893	10.1016/s2213-2600(15)00466-x	Elsevier BV	The Lancet. Respiratory medicine	2213-2600, 2213-2619	Rapid, comprehensive, and affordable mycobacterial diagnosis with whole-genome sequencing: a prospective study	4020.64	TRUE	not applicable	unknown	cc-by	not applicable	hybrid	TRUE	Wellcome Trust			unknown	98615	G0800778
PMC4820667	26917434	10.1016/s2213-2600(16)00046-1	Elsevier BV	The Lancet. Respiratory medicine	2213-2600, 2213-2619	Genomic landscape of the individual host response and outcomes in sepsis: a prospective cohort study.	4306.45	TRUE	not applicable	unknown	cc-by	not applicable	hybrid	TRUE	Wellcome Trust			1367322	NIHR/CS/009/007	281824
PMC5122671	27072790	10.1016/j.surge.2016.03.003	Elsevier BV	The surgeon : journal of the Royal Colleges of Surgeons of Edinburgh and Ireland	1479-666X	Insinuating electronics in the brain	2169.05	TRUE	not applicable	FALSE	cc-by-nc-nd	unknown	hybrid	FALSE	Wellcome Trust
PMC4697135	26489729	10.1016/j.thromres.2015.10.006	Elsevier BV	Thrombosis research	0049-3848, 1879-2472	Quantification of experimental venous thrombus resolution by longitudinal nanogold-enhanced micro-computed tomography	1940.51	TRUE	not applicable	unknown	cc-by	not applicable	hybrid	TRUE	British Heart Foundation			WT 084052/Z/07/Z	1719	AMS-SGCL12-Saha
PMC4804751	26845733	10.1016/j.tox.2016.01.011	Elsevier BV	Toxicology	0300-483X, 1879-3185	Induction of cytochrome P450 1A1 and 1A2 suppresses formation of DNA adducts by carcinogenic aristolochic acid I in rats in vivo	2026.54	TRUE	not applicable	unknown	cc-by	not applicable	hybrid	TRUE	Cancer Research UK			14329
PMC5110642	27344508	10.1016/j.trsl.2016.05.005	Elsevier BV	Translational research : the journal of laboratory and clinical medicine	1931-5244, 1878-1810	Clinical and methodological factors affecting Non-Transferrin-Bound Iron (NTBI) values using a novel fluorescent bead assay	2065.94	TRUE	not applicable	unknown	cc-by	not applicable	hybrid	TRUE	Wellcome Trust
PMC5093331	27591088	10.1016/j.tmaid.2016.08.010	Elsevier BV	Travel medicine and infectious disease	1477-8939, 1873-0442	Brucella melitensis prosthetic joint infection in a traveller returning to the UK from Thailand: case report and review of the literature	2366.96	TRUE	not applicable	unknown	cc-by	not applicable	hybrid	TRUE	Wellcome Trust
PMC4929974	27242194	10.1016/j.tibs.2016.05.005	Elsevier BV	Trends in biochemical sciences	0968-0004	Blind evaluation of hybrid protein structure analysis method	3074.79	TRUE	not applicable	unknown	cc-by	not applicable	hybrid	TRUE	Wellcome Trust
PMC4756277	26949746	10.1016/j.trecan.2015.11.003	Elsevier BV	Trends in cancer	2405-8033, 2405-8025	Cancer evolution and the limits of predictabili in precision cancer medicine	1891.74	TRUE	not applicable	unknown	cc-by	not applicable	hybrid	TRUE				PA12-15	18377
PMC4961066	27133808	10.1016/j.tcb.2016.04.001	Elsevier BV	Trends in cell biology	0962-8924, 1879-3088	Unravelling the actin cytoskeleton: a new competitive edge?	2965.85	TRUE	not applicable	unknown	cc-by	not applicable	hybrid	TRUE	Wellcome Trust
PMC4762228	26754530	10.1016/j.tics.2015.12.004	Elsevier BV	Trends in cognitive sciences	1364-6613, 1879-307X	Distorted grids as a spatial label and metric	2217.28	TRUE	not applicable	unknown	cc-by	not applicable	hybrid	TRUE	Wellcome Trust			101208	unknown
PMC4703769	26545853	10.1016/j.tics.2015.07.010	Elsevier BV	Trends in cognitive sciences	1364-6613, 1879-307X	Mood as representation of momentum	2437.22	TRUE	not applicable	unknown	cc-by	not applicable	hybrid	TRUE	Wellcome Trust			095844/Z/11/Z	98362	91593
PMC4993149	27422443	10.1016/j.tics.2016.06.012	Elsevier BV	Trends in cognitive sciences	1364-6613, 1879-307X	Neurobiological basis of language learning difficulties	3291.49	TRUE	not applicable	unknown	cc-by	not applicable	hybrid	TRUE	Wellcome Trust
PMC5086000	27592079	10.1016/j.it.2016.08.004	Elsevier BV	Trends in immunology	1471-4906, 1471-4981	Integrating Inflammasome Signaling in Sexually Transmitted Infections	3313.6	TRUE	not applicable	unknown	cc-by	not applicable	hybrid	TRUE
PMC4889773	27237815	10.1016/j.it.2016.04.003	Elsevier BV	Trends in immunology	1471-4906, 1471-4981	Immune Dysfunction as a Cause and Consequence of Malnutrition.	3328.24	TRUE	not applicable	unknown	cc-by	not applicable	hybrid	TRUE
PMC4854172	26946977	10.1016/j.tim.2016.01.008	Elsevier BV	Trends in microbiology	0966-842X, 1878-4380	Pseudomonas aeruginosa evolutionary adaptation and diversification in cystic fibrosis chronic lung infections	2648.98	TRUE	not applicable	unknown	cc-by	not applicable	hybrid	TRUE	Wellcome Trust			093306/Z/10	105624	C2D2
[truncated: 2,319 more rows]
